# Supplementary material for: Bioinformatics analysis of glial inflammatory responses to air pollution
Source: J Neuroinflammation. 2017 Aug 15;14:160. doi: 10.1186/s12974-017-0937-z (PMC5558762; doi:10.1186/s12974-017-0937-z)
Supplement: Supplementary file 2 — Differentially expressed RNAs between “nPM-treated”and control groups. (CSV 167 kb) [file 12974_2017_937_MOESM2_ESM.csv]

X	logFC	AveExpr	t	P.Value	adj.P.Val	B	anno
1389696_at	-1.051197612	10.59425758	-25.47097613	1.21E-07	6.47E-06	8.305602094	1-Mar
1384285_at	-1.706699023	10.08982194	-9.774151069	4.59E-05	0.000459595	1.550514371	3-Mar
1368984_at	-1.334758208	6.508926296	-4.149335837	0.005293436	0.021310105	-3.823890694	2-Sep
1382442_at	-1.634762964	5.100154105	-9.85215556	4.37E-05	0.000443711	1.605147302	6-Sep
1377141_at	1.53297335	9.350714317	12.71673105	9.24E-06	0.000139803	3.381411999	Aaed1
1384381_at	-1.157562279	9.407258418	-9.412255745	5.75E-05	0.000545426	1.291908302	Abca1
1368081_at	1.198407338	7.275799988	11.35674355	1.85E-05	0.000231748	2.589537204	Abca2
1390563_at	1.093717223	10.10549445	14.55954338	4.01E-06	7.63E-05	4.335866608	Abca3
1384603_at	-3.535015339	5.11351609	-18.82452524	8.08E-07	2.39E-05	6.159423219	Abca4
1370464_at	-1.724892592	3.034313355	-5.98199484	0.000789576	0.004322307	-1.689027745	Abcb1a
1370583_s_at	-3.08058032	8.69220578	-49.57830643	1.78E-09	4.38E-07	12.88611254	Abcb1a /// Abcb1b
1379717_at	-1.200687855	10.13321226	-30.24991935	4.07E-08	3.06E-06	9.51604978	Abcg3l2 /// Abcg3l4 /// LOC102552852 /// LOC102556623
1389594_at	1.137703189	9.21121805	16.54338264	1.81E-06	4.17E-05	5.241404841	Abhd12
1382137_at	1.343224405	11.53152423	10.49195153	2.99E-05	0.000332115	2.039258008	Abhd3
1379854_at	-1.814683161	5.375803459	-8.897245873	8.05E-05	0.000709406	0.908507079	Abhd5
1393197_at	1.123879471	5.611349925	6.331277023	0.00057612	0.003366546	-1.332066941	Abhd8
1388546_at	1.435379312	3.473440072	23.05312306	2.26E-07	9.71E-06	7.599216897	Ablim1
1370893_at	1.054477068	10.13822449	13.31156687	6.97E-06	0.000114808	3.703109462	Acaca
1384406_at	-1.070022551	3.770047696	-5.133648989	0.00180194	0.008556808	-2.619770022	Ackr4
1398250_at	1.399814939	8.754994222	15.20642731	3.06E-06	6.21E-05	4.643648154	Acot1
1388211_s_at	1.404005257	5.533710106	10.01284429	3.97E-05	0.000411921	1.716492162	Acot1 /// Acot2
1368789_at	-1.095092939	4.076670015	-6.282766307	0.000601421	0.003484925	-1.380782976	Acpp
1388153_at	-1.018747357	6.436241269	-10.4093181	3.14E-05	0.000344209	1.984545718	Acsl1
1387101_at	-1.525289445	11.84859894	-21.2315803	3.80E-07	1.41E-05	7.014827878	Acsl4
1368182_at	1.236959752	7.853013857	10.5104113	2.96E-05	0.000329502	2.051427323	Acsl6
1389649_at	-1.053815963	6.317233821	-3.93897756	0.006788209	0.026242416	-4.099308202	Acss3
1369928_at	6.097413029	5.159368466	47.11429555	2.46E-09	5.27E-07	12.54955266	Acta1
1370857_at	1.574623453	9.493489148	8.181239536	0.000132151	0.001046051	0.342610442	Acta2
1370856_at	1.874501253	5.416604036	7.610702556	0.000201595	0.001457323	-0.138688534	Acta2 /// Actc1
1386869_at	7.054180922	7.191070101	32.32718486	2.67E-08	2.27E-06	9.980019762	Actg2
1395886_at	-2.525574697	9.461154201	-6.558504794	0.000472619	0.002863984	-1.107457603	Actr3 /// Actr3b /// LOC100910079
1389151_at	2.312618856	8.721737892	25.89494864	1.09E-07	6.03E-06	8.422271601	Adam19
1374187_at	1.196076273	7.535339705	8.932896522	7.86E-05	0.00069611	0.935657318	Adam22
1392754_at	-2.289184179	3.310806496	-27.64287396	7.19E-08	4.60E-06	8.883041167	Adam8
1368223_at	-2.431714542	8.072605767	-20.18493548	5.21E-07	1.77E-05	6.655535355	Adamts1
1380088_at	1.120021835	7.360798909	8.157216784	0.000134453	0.001059915	0.322911947	Adamts12
1384724_at	-1.024314001	5.576845528	-10.79721806	2.51E-05	0.000292753	2.238060808	Adamts5
1376481_at	2.852473263	5.443751122	9.51048688	5.41E-05	0.000521544	1.362955321	Adamts9
1391139_at	-3.275087711	4.747411222	-19.76944149	5.94E-07	1.94E-05	6.507664252	Adamtsl1
1376022_at	-1.76536646	7.657760618	-16.03688113	2.20E-06	4.81E-05	5.020684794	Adar
1399096_at	-1.078538553	12.64086449	-21.81270708	3.20E-07	1.24E-05	7.206644824	Add3
1390549_at	-1.110050682	5.925382133	-13.34441584	6.87E-06	0.000113448	3.720476378	Adipor2
1387219_at	-2.257668329	9.875105494	-20.85430618	4.25E-07	1.53E-05	6.887424153	Adm
1368300_at	-4.943153489	5.036519651	-18.09730267	1.03E-06	2.85E-05	5.879311593	Adora2a
1387395_at	-3.594163936	7.675148577	-16.35388244	1.95E-06	4.39E-05	5.159609796	Adora2b
1376379_a_at	-1.654371964	10.27735674	-21.18912128	3.84E-07	1.41E-05	7.000604735	Adprm
1393048_at	2.231651464	6.837006928	14.83331446	3.57E-06	6.98E-05	4.467703528	Adra2a
1383491_at	-1.486627375	8.432299288	-13.57413881	6.18E-06	0.000105734	3.840806999	Aen
1383278_at	-1.173773588	9.581569198	-22.84725781	2.39E-07	1.01E-05	7.535581888	Agap1
1372736_at	1.067367956	9.425826027	10.70248001	2.65E-05	0.000304375	2.176913465	Agl
1381574_at	-1.73922706	4.063203767	-13.08202575	7.76E-06	0.000123377	3.580608832	Agmo
1375566_at	-1.102312683	7.433087248	-9.287325196	6.23E-05	0.000580724	1.200608202	Agtrap
1380746_at	-1.323452482	3.113090816	-12.2182972	1.18E-05	0.000167637	3.10076604	Ahrr
1374499_at	-1.581963161	11.58198395	-23.12174682	2.22E-07	9.63E-06	7.620299734	Aida
1392597_at	1.43198152	8.370861416	13.72417175	5.78E-06	0.000100469	3.918354967	Aif1l
1374346_at	1.205305884	3.771492977	6.97124786	0.000334239	0.002170222	-0.713981614	Aifm2
1373122_at	1.631784569	8.969403711	32.98109391	2.36E-08	2.11E-06	10.11943602	Ajuba
1371824_at	-2.884270685	7.531440016	-18.38289509	9.37E-07	2.66E-05	5.990629406	Ak4
1368869_at	1.547885196	13.10315803	50.93472529	1.50E-09	4.11E-07	13.062915	Akap12
1373843_at	-2.191243001	11.32703551	-26.22343245	1.00E-07	5.72E-06	8.511302451	Akap2
1392079_at	-5.51971218	4.90709103	-49.27435257	1.85E-09	4.49E-07	12.8456914	Akap7
1370902_at	-3.904228971	12.15985991	-47.98099227	2.19E-09	4.89E-07	12.67028492	Akr1b8
1367982_at	-1.099311872	9.446201116	-13.33159778	6.91E-06	0.000114062	3.713704426	Alas1
1387022_at	4.391889086	7.04113997	15.36924228	2.86E-06	5.89E-05	4.719119406	Aldh1a1
1383469_at	-1.03596616	2.846086959	-3.851954484	0.007538698	0.02864687	-4.215080324	Aldh1a3
1379400_at	-2.343068601	8.180174123	-18.46917627	9.10E-07	2.61E-05	6.023921878	Aldh1l2
1396383_at	-1.095835837	8.094574239	-12.98955083	8.11E-06	0.000126879	3.530682216	Aldh3b1
1369672_at	1.022959129	6.637164591	8.059390541	0.000144317	0.001117556	0.242193963	Alox5ap
1373345_at	-2.063782216	7.273291164	-17.20894279	1.42E-06	3.52E-05	5.521570262	Amigo2
1374622_at	1.530575179	7.979782129	12.84688696	8.68E-06	0.000133589	3.452997527	Amot
1368342_at	-2.164949961	11.06419406	-65.90872454	2.91E-10	1.59E-07	14.69235575	Ampd3
1390326_at	-2.244763293	5.396534764	-3.916634103	0.006972686	0.02684372	-4.128931644	Ang
1374207_at	1.844678151	3.223203769	4.832017119	0.002470739	0.011194275	-2.974049448	Angpt2
1388924_at	-4.82750533	11.08435095	-92.81358325	3.30E-11	5.16E-08	16.63454515	Angptl4
1379095_at	-1.3278756	4.586411395	-4.191449075	0.005040367	0.020495601	-3.769515331	Ankdd1a
1393439_a_at	1.121021836	8.89079914	11.7054076	1.54E-05	0.000203589	2.800610978	Ankh
1394649_at	-1.31533531	8.234757621	-7.975383186	0.000153452	0.001171665	0.17222817	Ankrd6
1390896_at	1.250479327	6.623955139	6.296322893	0.000594226	0.003450303	-1.367141532	Anks1b
1373250_at	2.301366206	8.961702841	22.49708769	2.64E-07	1.08E-05	7.425979436	Anln /// Anlnl1
1377828_at	-2.716857819	4.384201906	-7.199110211	0.000277975	0.001880111	-0.504379299	Ano3
1389673_at	1.304566087	4.163899571	9.423679493	5.71E-05	0.000542891	1.300203951	Ano5
1389017_at	-2.238868235	10.55304751	-35.20464601	1.56E-08	1.64E-06	10.57189565	Antxr2
1367974_at	-1.820709473	11.47080536	-27.53751438	7.37E-08	4.68E-06	8.856145283	Anxa3
1387376_at	-1.971278319	5.998481538	-10.37255306	3.21E-05	0.000349414	1.96007757	Aox1
1377769_at	-1.146579455	11.63045612	-16.00569525	2.22E-06	4.86E-05	5.006873023	Ap1s1
1398616_at	1.590367326	11.0101836	20.15426473	5.26E-07	1.78E-05	6.644725067	Ap1s2
1385659_at	-1.142108968	7.025605127	-18.0858501	1.04E-06	2.86E-05	5.874811312	Apcdd1
1375060_at	2.180707523	6.053573646	13.15708071	7.49E-06	0.000120457	3.620886072	Apitd1 /// Cort /// Kif1b /// LOC100360180
1389307_at	1.158441677	6.374270746	6.422605993	0.000531699	0.003150183	-1.241086817	Aplp1
1379604_at	-3.8901116	6.695592377	-47.98534903	2.19E-09	4.89E-07	12.67088525	Apol3
1376496_at	-4.390311068	8.378500026	-57.21984986	7.15E-10	2.62E-07	13.81271466	Apol9a
1369625_at	1.032332216	11.59577811	14.62905612	3.89E-06	7.47E-05	4.369565783	Aqp1
1369871_at	-2.441070235	3.812728664	-10.10136145	3.76E-05	0.00039578	1.777150448	Areg
1368266_at	-6.27863453	7.782082278	-41.00378174	5.93E-09	8.57E-07	11.61690717	Arg1
1394419_at	1.400554707	10.37250614	22.96727199	2.32E-07	9.90E-06	7.572750582	Arhgap11a
1389711_at	1.236554318	3.805879308	9.635790743	5.00E-05	0.000490648	1.452654413	Arhgap19
1392590_at	1.44100808	8.184972873	17.36202047	1.34E-06	3.41E-05	5.584497773	Arhgap24
1388940_at	-1.708541361	8.608613533	-13.55518753	6.24E-06	0.000106398	3.830953658	Arhgap25
1391916_at	-1.306656651	7.466258475	-13.10810449	7.67E-06	0.000122373	3.59462834	Arhgap26
1380831_at	4.938745534	5.601041077	21.72194582	3.29E-07	1.26E-05	7.177031413	Arhgap6
1373881_at	-1.347659051	9.915558359	-9.99151092	4.02E-05	0.00041614	1.701801604	Arhgdib
1374907_at	-1.943477194	6.026654283	-17.3064147	1.37E-06	3.45E-05	5.561702761	Arhgef17
1393437_at	1.139990463	6.709937168	6.54618307	0.000477656	0.002889441	-1.119488287	Arhgef26
1377750_at	-1.434173839	7.41158831	-7.60791812	0.000202024	0.001459744	-0.141108649	Arhgef3
1390900_at	-1.061145255	3.989632023	-5.071013064	0.001922064	0.009029344	-2.692293258	Arid3a
1379311_at	-1.834960309	4.602645288	-13.25123881	7.17E-06	0.000116541	3.671108618	Arid5a
1395855_at	-1.186426281	2.824513521	-5.517114294	0.001227405	0.006232011	-2.187413374	Arih2
1382931_at	1.040583033	9.31945325	8.535728212	0.000102918	0.000860617	0.627802165	Arl4a
1377110_at	-3.103464983	6.359191686	-42.74127137	4.56E-09	7.13E-07	11.89771364	Arl5c
1389208_at	1.459659208	8.415502505	8.829009502	8.42E-05	0.000735707	0.85627927	Armcx4
1370510_a_at	-1.116037392	7.278099707	-9.119682847	6.95E-05	0.000632432	1.076399581	Arntl
1370265_at	-1.24165084	9.176560167	-15.67715256	2.53E-06	5.39E-05	4.859750911	Arrb2
1394948_at	-1.73976487	9.242526892	-22.80328894	2.42E-07	1.02E-05	7.521914512	Arrdc3
1391808_at	-2.17156925	8.960468416	-25.96654438	1.07E-07	5.97E-06	8.441776724	Arrdc4
1375412_at	1.558380935	11.52556046	16.71465434	1.70E-06	3.99E-05	5.314545383	Arsb
1383918_at	1.134865026	5.754416271	10.78907013	2.52E-05	0.000293878	2.232821003	Arsg
1378174_at	3.602812525	4.873631741	21.72127191	3.29E-07	1.26E-05	7.176811058	Arsi
1372065_at	-1.180643451	3.497281312	-14.50028314	4.11E-06	7.77E-05	4.307015329	Art3
1392769_at	1.09207941	8.949463278	9.150394396	6.81E-05	0.000622102	1.099301633	Arxes2
1377755_at	-2.907130815	8.797810817	-46.46081117	2.68E-09	5.35E-07	12.45676462	Ascc3
1369765_at	1.552917011	8.740518709	14.79714495	3.62E-06	7.07E-05	4.450420844	Ascl1
1383684_at	1.756537526	8.529238475	16.24392275	2.03E-06	4.54E-05	5.111720777	Asf1b
1370149_at	-5.615757511	5.999392295	-38.19090546	9.30E-09	1.17E-06	11.13227618	Asgr1
1387925_at	-1.66836314	10.19131324	-61.96075965	4.31E-10	1.99E-07	14.31266025	Asns
1368563_at	2.249327894	8.052178678	24.37632776	1.59E-07	7.82E-06	7.994784818	Aspa
1387959_at	-1.370914251	7.196395058	-5.97139022	0.000797337	0.004357124	-1.700094638	Aspg
1393581_at	1.50603887	9.773325407	26.86753333	8.61E-08	5.22E-06	8.682539487	Aspm
1370964_at	-5.263640059	8.890763899	-17.28889303	1.38E-06	3.46E-05	5.554504956	Ass1
1379561_at	-1.196687842	11.74629041	-44.53044895	3.51E-09	6.24E-07	12.17343127	Atad1 /// LOC100910983
1376599_at	1.116191458	9.57319384	13.20054839	7.34E-06	0.000118551	3.644113208	Atad2
1384701_at	1.05340807	4.931373745	5.244688815	0.001609191	0.00777688	-2.492528981	Atad5
1367624_at	-1.02577403	12.57316983	-21.44657316	3.56E-07	1.34E-05	7.086407032	Atf4
1372601_at	-2.087243479	10.42758794	-40.04799323	6.88E-09	9.31E-07	11.45657331	Atf5
1382735_at	-1.349890814	7.11385592	-8.504309409	0.000105185	0.000875344	0.60293199	Atg12
1384797_at	-1.352473893	5.363203954	-6.223596529	0.000634007	0.003625778	-1.440574192	Atl3
1373287_at	-1.056030395	7.964432658	-16.97041405	1.54E-06	3.71E-05	5.422407146	Atoh8
1385361_at	-1.518720542	6.697266082	-7.403486157	0.000236554	0.001658013	-0.320770002	Atp10a
1371925_at	-1.274282377	8.93259432	-12.79610204	8.90E-06	0.000135952	3.425147425	Atp13a1
1382576_at	1.168675316	6.804143956	5.60595549	0.001125911	0.005804826	-2.090035378	Atp6v0a2 /// Tctn2
1388738_at	1.507571728	6.493396936	11.32908723	1.88E-05	0.000234369	2.572540424	Atrnl1
1384742_at	-1.247248373	9.849020288	-7.147633968	0.000289674	0.001941087	-0.551272506	Atrx
1376039_at	1.365972064	7.924938772	11.16781372	2.05E-05	0.000250438	2.472661914	Aurka
1368260_at	1.619376435	8.968612187	21.05825332	4.00E-07	1.46E-05	6.956583412	Aurkb
1371440_at	-1.206784031	13.8884359	-40.3983473	6.51E-09	9.02E-07	11.51584596	B2m
1374083_at	1.955072384	7.761887475	12.49985434	1.03E-05	0.000151024	3.260587247	B3galtl
1369755_at	1.957868486	6.763729377	18.00025277	1.07E-06	2.93E-05	5.841086048	B3gat2
1384791_at	-1.330946239	3.31668598	-7.563448916	0.000209016	0.001498774	-0.179856589	B3gnt2
1377637_at	1.801296259	4.395056378	5.940083798	0.000820758	0.004460812	-1.732846218	B3gnt5
1371073_at	-1.958380351	9.03551228	-19.1271719	7.31E-07	2.23E-05	6.272830347	B4galt1
1371537_at	-1.388431393	12.29471543	-58.87489251	5.96E-10	2.30E-07	13.99310579	B4galt5
1377390_at	-1.06980751	8.294936504	-21.96953319	3.06E-07	1.20E-05	7.257519255	Bace2
1389047_at	1.213161648	7.150086921	6.33929371	0.000572056	0.003347202	-1.32404254	Bag2
1382663_at	-2.281043956	6.152944545	-9.335424808	6.04E-05	0.000566118	1.235885861	Batf
1395034_at	-4.796300985	5.047485714	-13.37113451	6.78E-06	0.000112535	3.734572407	Batf2
1383010_at	1.248216339	6.468907184	6.364839437	0.000559323	0.003287542	-1.298521604	Bcl11a
1368482_at	-2.534655438	12.10005143	-40.81135832	6.11E-09	8.70E-07	11.58497255	Bcl2a1
1398482_at	-2.967857918	8.048160045	-18.03063836	1.06E-06	2.91E-05	5.853076126	Bcl3
1370650_s_at	-1.593817081	2.975564466	-3.766511753	0.008365648	0.031247091	-4.329775276	Bdkrb2
1377814_at	-2.007517189	5.89903072	-20.00697062	5.51E-07	1.84E-05	6.592577525	Bean1
1387448_at	-1.196855484	6.236838457	-5.692330971	0.001036243	0.005419797	-1.996340674	Bet1l
1373458_at	-1.521357522	10.12217461	-17.56811839	1.24E-06	3.25E-05	5.66836125	Bex4
1395377_at	-1.718119236	8.401780211	-24.61039875	1.50E-07	7.57E-06	8.06244757	Bfar
1367594_at	1.062841675	11.7458428	10.05858695	3.86E-05	0.000403992	1.747897711	Bgn
1393708_at	1.451247906	5.494442358	5.803536954	0.000932458	0.004957859	-1.877115146	Bhlhe22
1369415_at	-1.033419322	8.338623363	-9.118526721	6.95E-05	0.000632432	1.075536136	Bhlhe40
1377759_at	-2.15274068	9.656651727	-41.01357878	5.92E-09	8.57E-07	11.61852851	Bid
1368291_at	-2.231373038	10.66092538	-23.10399551	2.23E-07	9.65E-06	7.614852276	Birc2
1370113_at	-5.218584048	8.554261945	-23.95832504	1.77E-07	8.32E-06	7.872265288	Birc3
1368799_at	1.507611423	8.701980008	17.52218661	1.26E-06	3.29E-05	5.649755605	Birc5
1382783_at	1.140527878	7.045107588	9.298361185	6.19E-05	0.000577134	1.208716368	Blm
1392539_at	-1.398200751	10.60606078	-17.14298976	1.45E-06	3.58E-05	5.494287824	Blvrb /// LOC681468
1398270_at	1.172097276	6.111059432	6.276571896	0.000604742	0.003499129	-1.387023278	Bmp2
1387232_at	1.055777096	9.10440377	9.38631765	5.85E-05	0.000552826	1.273039955	Bmp4
1391345_at	1.035807927	7.131200317	4.161636788	0.005218086	0.021064027	-3.807981625	Bmper
1387805_at	-1.099726796	11.44039603	-45.99044636	2.86E-09	5.53E-07	12.38901772	Bnip3
1369294_at	-3.400099199	9.319982664	-29.66550416	4.60E-08	3.33E-06	9.379335205	Bst1
1390738_at	-4.094459699	11.11945105	-20.39243419	4.89E-07	1.69E-05	6.728238828	Bst2
1380377_at	-1.468283243	7.533341411	-17.05324043	1.50E-06	3.65E-05	5.456995105	Btk
1385086_at	1.565846571	9.336566717	21.21598521	3.81E-07	1.41E-05	7.009607109	Bub1
1383926_at	2.261227262	8.400396906	31.36919544	3.23E-08	2.65E-06	9.770161278	Bub1b
1378362_at	3.072194932	5.90167936	8.871426924	8.19E-05	0.000719247	0.888785909	C1ql3
1374722_at	-4.200491081	4.902411316	-43.73649647	3.94E-09	6.73E-07	12.05269764	C1qtnf1
1382185_at	2.503510484	4.689139006	8.266650121	0.000124322	0.001001159	0.412258347	C1qtnf2
1383241_at	-2.592853607	12.48569318	-71.23466675	1.78E-10	1.13E-07	15.15868781	C1r
1387893_at	-2.940199347	12.8429495	-46.96076489	2.51E-09	5.33E-07	12.52789047	C1s
1383391_a_at	-1.712490324	12.51631309	-35.80369157	1.40E-08	1.53E-06	10.68843744	C2 /// Cfb
1368000_at	-1.803115457	13.30943838	-33.01938335	2.34E-08	2.10E-06	10.12750625	C3
1369173_at	-3.808762092	8.379372341	-23.81526414	1.84E-07	8.56E-06	7.829825734	C3ar1
1370892_at	-4.508718078	8.43531488	-19.88677022	5.72E-07	1.90E-05	6.549735053	C4a /// C4b /// LOC100911579
1384580_at	-1.528340727	3.096495686	-6.330346719	0.000576594	0.003368681	-1.332998621	C6
1369649_at	1.04688176	7.151105596	10.02752626	3.93E-05	0.000409529	1.726586265	Cacna2d1
1376657_at	1.412878316	9.733329522	17.09320787	1.48E-06	3.62E-05	5.473626229	Cadm1
1370201_at	3.304538987	9.778174065	41.85683207	5.20E-09	7.74E-07	11.7564454	Calb1
1370562_at	-1.656365502	3.013643967	-6.833883086	0.000374396	0.002381535	-0.84291611	Calcb
1368824_at	1.515005783	10.81758651	11.58291127	1.64E-05	0.000213292	2.727122638	Cald1
1389568_at	1.016597036	8.212741858	12.88024551	8.54E-06	0.000132062	3.47123479	Calhm2
1368753_at	1.086444186	3.128101402	5.094160312	0.001876652	0.008846748	-2.665428883	Camkk2
1397536_at	1.061318451	8.07295208	10.37712617	3.20E-05	0.00034885	1.96312534	Camta1
1368808_at	-1.599825047	9.816589434	-4.878611699	0.002351245	0.010731049	-2.918487086	Cap1
1377788_at	1.08436079	6.162334765	6.068613312	0.000729294	0.004061663	-1.599146297	Cap2
1395173_at	-1.310833109	5.269316766	-5.456953235	0.001302002	0.006538184	-2.253942764	Caprin1
1373790_at	1.68314802	3.926621991	7.431376024	0.000231468	0.001630447	-0.296027174	Car14
1367896_at	4.306210143	4.536281636	46.12808535	2.81E-09	5.48E-07	12.40892622	Car3
1381819_at	3.426521349	5.695993856	12.9450949	8.28E-06	0.000129003	3.506561261	Card14
1391572_at	-1.992437418	6.77070126	-43.67285442	3.97E-09	6.75E-07	12.04290963	Cars
1395480_at	1.218214856	6.41759436	4.112732785	0.005524892	0.022073305	-3.871359054	Casc5 /// LOC100911204 /// LOC102549359
1369186_at	-3.329467551	9.009620498	-45.15262457	3.22E-09	5.95E-07	12.26630158	Casp1
1387605_at	-2.638784156	9.317322402	-56.79268316	7.50E-10	2.71E-07	13.76507703	Casp12
1387690_at	-1.239085538	6.85344128	-4.687533571	0.002886842	0.012757978	-3.148306219	Casp3
1387818_at	-2.946142693	10.4956045	-46.59767181	2.63E-09	5.33E-07	12.47632477	Casp4
1389170_at	-1.738133472	9.399161907	-23.88333174	1.81E-07	8.45E-06	7.850050928	Casp7
1369262_at	-2.33695619	8.042120776	-34.01155497	1.94E-08	1.88E-06	10.33314184	Casp8
1388604_at	3.550606229	5.370346268	17.88774097	1.11E-06	3.00E-05	5.79651371	Casq1
1390800_a_at	1.240601896	10.70017056	8.402561115	0.000112932	0.000925051	0.521855147	Cav2
1373115_at	-1.267504164	9.535769766	-20.45058259	4.80E-07	1.67E-05	6.748479074	Ccdc115
1393346_at	-2.45595969	7.489200352	-14.2318895	4.61E-06	8.47E-05	4.174911656	Ccdc125
1390805_at	2.512268377	6.425893466	15.59664738	2.61E-06	5.53E-05	4.823242736	Ccdc167
1390964_at	1.654300452	4.28440798	6.743546812	0.000403798	0.002526703	-0.928793786	Ccdc177
1372140_at	-1.081714633	7.779142749	-8.820472039	8.47E-05	0.000738108	0.849720403	Ccdc28a
1394387_at	1.787775453	7.169169181	10.56446111	2.87E-05	0.000322304	2.086948292	Ccdc34
1385724_at	1.237049062	5.701891793	10.2984908	3.35E-05	0.000360632	1.910549623	Ccdc74a
1390284_at	1.526951239	4.677459546	14.08926078	4.91E-06	8.87E-05	4.103734501	Ccdc77
1370161_at	1.788563113	11.55400987	76.12937537	1.16E-10	9.29E-08	15.54652864	Ccdc80
1367973_at	-2.663015882	14.33878461	-27.54033784	7.37E-08	4.68E-06	8.856867459	Ccl2
1369814_at	-8.295485348	9.800045846	-16.79336612	1.65E-06	3.91E-05	5.347912373	Ccl20
1369815_at	-6.088382851	9.786253571	-42.65432643	4.61E-09	7.13E-07	11.8839761	Ccl3
1370832_at	-7.670752322	9.990402032	-23.77425278	1.86E-07	8.62E-06	7.817611079	Ccl4
1369983_at	-11.02472995	8.678443817	-62.95831928	3.90E-10	1.86E-07	14.41156085	Ccl5
1389123_at	-3.351053911	13.11771979	-50.50120521	1.58E-09	4.16E-07	13.00703409	Ccl6
1379935_at	-3.902721099	13.3268833	-98.1857677	2.31E-11	3.99E-08	16.92268806	Ccl7
1392172_at	-5.638147081	8.588426398	-16.03034701	2.20E-06	4.82E-05	5.017793098	Ccl9
1382827_at	1.170087797	4.376070837	3.357457009	0.013982853	0.048274062	-4.892267639	Ccna1
1379582_a_at	2.167188111	10.48753719	11.39830162	1.81E-05	0.000228391	2.615006271	Ccna2
1370345_at	2.284672636	9.608480242	50.31498768	1.62E-09	4.19E-07	12.98285159	Ccnb1
1389566_at	1.958191147	10.43683158	33.17171842	2.27E-08	2.06E-06	10.15951325	Ccnb2
1373530_at	1.900779271	6.962522625	5.944677958	0.000817273	0.00444731	-1.728032444	Ccne1
1374359_at	1.657296296	9.007810994	7.169514116	0.000284634	0.00191474	-0.531308115	Ccne2
1374277_at	1.468904903	5.067487408	7.289877686	0.000258635	0.001778308	-0.422332028	Ccnjl
1396317_at	1.052066511	9.405457601	14.56113603	4.00E-06	7.63E-05	4.336640443	Ccpg1
1370083_at	-3.345405403	4.981680782	-11.51883637	1.69E-05	0.000218267	2.68839657	Ccr1
1369290_at	-4.77276037	5.518495038	-10.21658628	3.51E-05	0.000375298	1.855403939	Ccr5
1398591_at	-4.234023433	4.491571878	-35.06419946	1.60E-08	1.66E-06	10.5442558	Ccrl2
1377201_at	1.279288439	6.703181953	7.698212226	0.000188633	0.00137836	-0.06299129	Ccsap
1368490_at	-3.476691361	11.74451293	-32.38198356	2.65E-08	2.26E-06	9.991820019	Cd14
1393863_at	1.821385953	6.273855672	12.01527573	1.31E-05	0.000180981	2.9833783	Cd180
1369670_at	-2.833264004	8.920210421	-19.95507342	5.60E-07	1.86E-05	6.574111896	Cd200
1387745_at	-3.686710518	6.356240273	-14.21164934	4.65E-06	8.51E-05	4.164852752	Cd200r1
1370483_at	-4.361529445	6.312164399	-42.92517505	4.43E-09	7.13E-07	11.92666496	Cd244
1389490_at	2.626038061	8.181640953	29.28305035	5.00E-08	3.51E-06	9.288301526	Cd248 /// LOC100911882 /// LOC100911932
1367689_a_at	-2.592092483	8.368159661	-18.56787986	8.80E-07	2.53E-05	6.061818306	Cd36 /// LOC100365047
1386901_at	-2.02621456	9.747983309	-18.45577927	9.14E-07	2.61E-05	6.018762675	Cd36 /// LOC100365047 /// RGD1565355
1390325_at	-2.018780688	8.674023513	-21.00607934	4.06E-07	1.48E-05	6.938955798	Cd38
1377698_at	-4.300160879	6.091257421	-15.58638772	2.62E-06	5.53E-05	4.818576939	Cd40
1387952_a_at	-1.591242461	11.70220614	-29.82006758	4.46E-08	3.28E-06	9.41577078	Cd44
1369559_a_at	-1.78687383	11.77732919	-27.00158419	8.34E-08	5.09E-06	8.717636249	Cd47
1367929_at	1.457444453	10.94997172	23.28425381	2.12E-07	9.46E-06	7.669970625	Cd59
1385635_at	1.8173351	9.795334474	28.27817782	6.23E-08	4.09E-06	9.04296127	Cd5l
1384837_at	-4.916390919	4.606171366	-71.54790799	1.73E-10	1.13E-07	15.18461709	Cd69
1367679_at	-7.666638188	7.293867258	-53.40439102	1.11E-09	3.38E-07	13.37054621	Cd74
1386976_at	-1.330264091	11.11145979	-28.79817692	5.55E-08	3.77E-06	9.171053712	Cd82
1390529_at	-2.307243121	9.336355254	-28.96171975	5.36E-08	3.69E-06	9.210833093	Cd83
1377943_at	-2.036563086	9.853912832	-41.04978134	5.89E-09	8.57E-07	11.62451595	Cd86
1372468_at	-1.323248171	7.839279433	-16.51419408	1.83E-06	4.19E-05	5.228866014	Cd97
1387895_s_at	1.733586339	8.106284262	23.07528403	2.25E-07	9.68E-06	7.606032302	Cdc20
1370034_at	1.32051103	3.781754673	7.947995648	0.000156571	0.001190808	0.149286949	Cdc25b
1389145_at	-3.838187956	5.712151159	-35.26504171	1.54E-08	1.64E-06	10.58374418	Cdc42ep2
1379235_x_at	1.388058439	7.174077732	10.13171767	3.69E-05	0.000390129	1.797843563	Cdc45
1381833_at	2.530692198	6.444336472	16.05023013	2.19E-06	4.80E-05	5.026588859	Cdca2
1374449_at	1.969944758	9.348642682	20.82828471	4.28E-07	1.53E-05	6.878550956	Cdca3
1374540_at	2.779022152	6.601159421	12.57829153	9.89E-06	0.000146685	3.304510971	Cdca7
1389755_at	1.745942761	7.047054861	12.31279473	1.13E-05	0.000161643	3.154786173	Cdca7l
1371928_at	1.992255879	8.015688449	24.17531719	1.68E-07	8.09E-06	7.936140348	Cdca8
1386947_at	4.341858417	5.197138582	23.2324814	2.15E-07	9.52E-06	7.654184934	Cdh1
1380317_at	1.138644992	8.423064143	16.2177909	2.05E-06	4.58E-05	5.100293355	Cdh10
1391146_at	1.27466407	6.298590797	6.79482109	0.000386799	0.002445928	-0.879943391	Cdh11
1370657_at	1.172278288	6.816831738	6.896703853	0.000355385	0.002283026	-0.783705841	Cdh6
1367776_at	1.676594477	11.81414453	23.27072339	2.13E-07	9.48E-06	7.665848608	Cdk1
1378874_at	1.141293338	7.888253101	8.717802193	9.08E-05	0.00077964	0.77041655	Cdk2
1373901_at	-1.733224804	10.95153345	-19.16254322	7.22E-07	2.22E-05	6.285967381	Cdk2ap2
1387391_at	-3.632548406	8.432248544	-23.1214664	2.22E-07	9.63E-06	7.620213712	Cdkn1a
1370054_at	1.376520645	9.256604334	15.03495567	3.28E-06	6.54E-05	4.563313482	Cdkn2c
1372685_at	1.777113661	10.71507213	17.6474001	1.21E-06	3.18E-05	5.700363116	Cdkn3
1367755_at	-1.026821526	10.83347182	-18.32192459	9.57E-07	2.69E-05	5.967009435	Cdo1
1374139_at	1.274303473	7.938051318	13.11744117	7.64E-06	0.000121962	3.599641181	Cdr2
1368248_at	-1.104370438	8.680023719	-17.69588092	1.19E-06	3.16E-05	5.719862276	Cds1
1370371_a_at	-1.240149015	8.219114781	-14.76206501	3.68E-06	7.14E-05	4.43361982	Ceacam1 /// Ceacam10
1383243_at	1.886520935	7.396196093	28.35280966	6.13E-08	4.05E-06	9.061498108	Cebpa
1387087_at	-3.241596146	11.29152959	-34.37876042	1.81E-08	1.82E-06	10.40759138	Cebpb
1368813_at	-1.903930974	11.61169869	-27.02394615	8.30E-08	5.08E-06	8.723473178	Cebpd
1387819_at	1.625457177	4.436525601	18.32429996	9.56E-07	2.69E-05	5.967931115	Cela1
1380318_at	1.405265593	10.04515866	19.59627765	6.28E-07	2.01E-05	6.445112028	Cemip
1389542_at	2.461723203	6.802444798	23.92152776	1.79E-07	8.39E-06	7.86137425	Cenpe
1382493_at	2.08123556	9.438786192	30.54245992	3.83E-08	2.96E-06	9.583427865	Cenpf
1368773_at	2.387694183	7.593010098	14.7568964	3.69E-06	7.15E-05	4.431141142	Cenpi
1379538_at	-1.388947069	9.460947006	-25.5809626	1.17E-07	6.36E-06	8.336061653	Cenpj
1382419_at	1.339551748	9.647652643	13.81369353	5.55E-06	9.73E-05	3.964242683	Cenpk
1393451_at	1.324976029	8.608536083	15.90650937	2.31E-06	5.03E-05	4.962769861	Cenpn
1393158_at	1.484142965	6.619272831	13.75076006	5.71E-06	9.96E-05	3.932013504	Cenpq
1375937_a_at	2.06793646	6.274269536	25.98140936	1.06E-07	5.96E-06	8.445819414	Cenpt
1393844_at	1.236997873	6.77995309	9.402291174	5.79E-05	0.000548379	1.284665081	Cenpu
1391518_at	3.105808254	6.927866897	12.95299003	8.25E-06	0.000128712	3.510850706	Cenpw
1377062_at	1.065453817	7.726011016	5.847893784	0.000894386	0.004789825	-1.829995031	Cep250
1374270_at	1.485999231	5.47010162	5.094430657	0.001876129	0.008846748	-2.665115563	Cep41
1388977_at	-1.091536818	11.91523906	-24.07165668	1.72E-07	8.20E-06	7.905700394	Cept1
1380452_at	1.061914721	7.033772646	15.43501621	2.79E-06	5.77E-05	4.749388631	Cfdp1 /// RGD1561890
1388928_at	1.035082071	10.23054792	5.20995429	0.001666868	0.008017003	-2.532150059	Cfl2
1368545_at	-4.250388487	6.295705205	-53.54102742	1.09E-09	3.36E-07	13.38705341	Cflar
1393411_at	1.022165756	8.03719791	11.59534903	1.63E-05	0.000212343	2.734616967	Cfp
1380063_at	-6.627078343	10.16459453	-47.20167311	2.43E-09	5.24E-07	12.56184372	Ch25h
1389573_at	-3.124133933	6.252965477	-76.19467898	1.16E-10	9.29E-08	15.55146277	Chac1
1373489_at	1.38138021	7.616066563	9.908960482	4.22E-05	0.000432285	1.644691785	Chaf1a
1373256_at	1.293860387	7.975570445	8.151995129	0.00013496	0.001062561	0.31862384	Chd3
1369010_at	1.455553361	3.400709328	12.09358682	1.26E-05	0.000175479	3.028875204	Chek2
1392171_at	-1.932035555	9.128217898	-18.81020275	8.11E-07	2.40E-05	6.154011291	Chi3l1
1376800_at	1.483692946	9.712796524	21.14275924	3.90E-07	1.43E-05	6.985041091	Chn2
1379770_at	-1.076877936	9.718267363	-29.3462098	4.93E-08	3.48E-06	9.303422058	Chpt1
1393579_at	2.111313276	5.405413282	7.322767027	0.000252009	0.001740449	-0.392801632	Chrdl1
1394264_at	1.290532351	6.144466702	13.10195467	7.69E-06	0.000122476	3.591324669	Chst5
1394334_at	-3.603287765	4.839115787	-30.16011956	4.15E-08	3.09E-06	9.49522704	Chst8
1370805_at	1.910427985	9.164221129	17.07175514	1.49E-06	3.64E-05	5.464704152	Cited1 /// RGD1563402
1375643_at	1.094759389	7.340157743	5.877255156	0.000870154	0.004677019	-1.798939845	Ckap4
1387984_at	-1.106377381	8.747610868	-19.57639787	6.32E-07	2.02E-05	6.437895346	Cklf
1376346_at	1.663507646	6.916846829	10.03679607	3.91E-05	0.000407961	1.732952641	Cks1b
1373823_at	1.267121947	11.85287316	16.96837364	1.55E-06	3.71E-05	5.421552984	Cks2
1385827_at	-1.768486434	6.643336858	-6.274607946	0.000605799	0.003504415	-1.389002711	Clcf1
1379932_at	1.493349761	9.078455773	11.58118452	1.64E-05	0.000213345	2.726081604	Clcn4
1376711_at	1.055359495	12.23402877	18.79249568	8.16E-07	2.41E-05	6.147314777	Cldn11
1390782_at	1.865732086	3.429298821	4.037761705	0.006034856	0.023784903	-3.969185193	Clec14a
1382153_at	1.53022972	9.002757613	16.42408025	1.89E-06	4.30E-05	5.190017417	Clec4a
1389553_at	1.068235204	11.91080478	18.41523935	9.27E-07	2.64E-05	6.003127953	Clec4a3
1368755_at	-7.514520273	6.226738862	-51.82786979	1.34E-09	3.90E-07	13.17623792	Clec4f
1381993_at	3.353679682	6.911444369	33.74623426	2.04E-08	1.94E-06	10.27879962	Clic2
1388759_at	-1.072379158	13.17488828	-32.90583569	2.39E-08	2.13E-06	10.10354419	Clic4
1394965_at	-1.006286704	5.88278937	-4.601140525	0.003172891	0.013825659	-3.253931128	Clint1
1389791_at	1.046673055	9.423402653	11.16005384	2.06E-05	0.000251302	2.467822901	Cln8
1391893_at	-1.125695976	3.720834893	-7.855334149	0.000167677	0.001255924	0.07118389	Clp1
1391077_at	1.481150712	4.134800485	4.889849392	0.002323406	0.010621137	-2.905132557	Clspn /// LOC100912530 /// LOC100912611
1374190_at	1.4051786	4.147679552	14.83714079	3.56E-06	6.97E-05	4.469529463	Clybl
1372372_at	1.000544921	8.279831994	6.097752325	0.000710202	0.003976697	-1.569113623	Cmbl
1372450_at	1.172006829	8.641714479	15.17712368	3.10E-06	6.26E-05	4.629981671	Cmc2
1379039_at	-1.49561729	7.806716556	-7.433118176	0.000231154	0.001628714	-0.294484065	Cmklr1
1393044_at	-7.009403572	10.63803177	-50.74874684	1.53E-09	4.11E-07	13.03901332	Cmpk2
1398925_at	-1.429452471	10.37312891	-30.59736506	3.79E-08	2.94E-06	9.595996557	Cmtr1
1390569_at	1.680806731	11.09456071	20.10329382	5.35E-07	1.80E-05	6.626723033	Cndp1
1367785_at	6.463806886	7.760191838	27.69037448	7.12E-08	4.57E-06	8.895131644	Cnn1
1369677_at	1.290847066	6.771215087	7.362938438	0.000244178	0.001696917	-0.356875239	Cnr1
1387385_at	1.446630562	4.782866159	5.890972939	0.000859088	0.004631896	-1.784467477	Cntn1
1382083_at	-3.374592685	6.312621377	-6.235090282	0.000627523	0.003597521	-1.428927644	Coch
1392915_at	1.363592804	9.989233158	16.62309763	1.76E-06	4.10E-05	5.275538613	Col11a1
1370927_at	1.94598615	8.91647778	29.76853793	4.50E-08	3.30E-06	9.403646018	Col12a1
1388459_at	1.553306845	4.104813427	10.94799731	2.31E-05	0.000274439	2.334381785	Col18a1
1387854_at	1.218797156	13.29206165	18.75752863	8.26E-07	2.42E-05	6.134072311	Col1a2
1377813_at	-1.664007416	4.117498524	-7.749745168	0.000181446	0.001334312	-0.018740449	Col22a1
1372161_at	3.896494252	4.972332984	16.68859376	1.71E-06	4.01E-05	5.303463943	Col26a1
1374705_at	2.353630001	10.12182599	26.55190067	9.28E-08	5.48E-06	8.599170843	Col4a5
1384276_at	1.566113105	7.924722582	13.67254259	5.91E-06	0.000102288	3.891760702	Col4a6
1369955_at	1.186743275	9.325677698	11.98689638	1.33E-05	0.000182649	2.966822497	Col5a1
1373463_at	1.170830486	12.11001281	26.4652563	9.47E-08	5.53E-06	8.576103575	Col5a2
1393891_at	1.340961724	10.89944472	19.64877377	6.17E-07	1.99E-05	6.464133707	Col8a1
1372818_at	1.582122155	11.8414274	28.45946797	5.99E-08	3.99E-06	9.087900132	Colec12
1370506_at	1.086436747	8.81786421	14.46297182	4.18E-06	7.85E-05	4.288791836	Coq7
1377097_at	2.419053636	5.597920044	9.76748451	4.61E-05	0.000461187	1.545827358	Cox6b2
1368420_at	-1.679198299	13.86638945	-36.39094692	1.26E-08	1.44E-06	10.80061126	Cp
1368584_a_at	1.605868656	6.537693211	8.433239807	0.00011053	0.000910802	0.546387834	Cplx2
1391656_at	1.804835045	7.370309321	16.69823725	1.71E-06	4.01E-05	5.307566511	Cpm
1368399_a_at	1.035388456	7.303725004	8.712062519	9.12E-05	0.000782042	0.765959639	Cpq
1390420_at	-2.517606278	4.794722713	-15.3718211	2.86E-06	5.89E-05	4.720308547	Cpxm1
1379682_at	1.652078155	6.418662632	18.63700571	8.60E-07	2.50E-05	6.088239311	Crb2
1374575_at	-1.782866992	7.341191988	-11.46913856	1.74E-05	0.000222174	2.658222951	Creb3l1
1383531_at	-1.410013645	7.43758476	-8.344388706	0.000117654	0.000958086	0.475129096	Crebrf
1378925_at	-1.111269671	10.34195789	-15.97582742	2.25E-06	4.91E-05	4.993620362	Crem
1370026_at	1.675908133	10.0787404	18.85394578	8.00E-07	2.37E-05	6.170527244	Cryab
1368059_at	-1.650006697	10.46592795	-20.10369052	5.35E-07	1.80E-05	6.626863318	Crym
1380393_at	1.012682233	6.527582395	4.786426279	0.002594292	0.011657043	-3.02871332	Cryz
1398286_at	1.185964647	9.415451122	9.11463961	6.97E-05	0.000633823	1.072632381	Csad
1388133_at	1.307260428	4.098319895	7.850040304	0.000168339	0.001260429	0.066699008	Csdc2
1379631_at	-1.30517357	8.010323708	-10.11383372	3.73E-05	0.00039311	1.785659209	Csf1
1369529_at	-6.774262204	6.21645421	-16.7806611	1.66E-06	3.92E-05	5.342536954	Csf3
1389402_at	-2.164913432	7.222114039	-18.97994058	7.67E-07	2.32E-05	6.217885843	Csrnp1
1382622_at	-3.360819221	5.192123936	-10.50954284	2.96E-05	0.000329549	2.050855239	Cst7
1379238_at	2.153219473	6.289957959	8.837851623	8.37E-05	0.000732607	0.863066466	Ctdspl
1367631_at	2.174396742	13.15626103	44.08304635	3.74E-09	6.47E-07	12.10570747	Ctgf
1375968_at	1.361943373	8.455805206	16.46462346	1.87E-06	4.25E-05	5.20752161	Ctnna2
1398354_at	1.435599995	7.907292042	8.130644746	0.000137054	0.001074154	0.301066771	Ctnnal1
1370123_a_at	-1.400919578	5.813478754	-6.638508292	0.000441345	0.002716287	-1.029752282	Cttn
1370922_at	1.396903638	5.384273262	9.565517388	5.22E-05	0.000507484	1.402476182	Ctxn1
1387037_at	2.553026568	3.676681323	6.368619109	0.000557466	0.003277249	-1.29475197	Cubn
1368200_at	-2.092441862	7.644987004	-13.69055852	5.86E-06	0.000101605	3.901051581	Cx3cl1
1387316_at	-5.26715744	11.76560163	-50.7558378	1.53E-09	4.11E-07	13.03992659	Cxcl1
1387969_at	-10.73129333	9.325128448	-54.13528219	1.02E-09	3.19E-07	13.4582441	Cxcl10
1379365_at	-10.37126518	10.0291252	-46.67516576	2.61E-09	5.33E-07	12.48737012	Cxcl11
1369633_at	-1.717675119	11.6542914	-35.04411487	1.60E-08	1.66E-06	10.5402932	Cxcl12
1398390_at	-7.564752541	6.234073229	-49.90778995	1.70E-09	4.36E-07	12.92959266	Cxcl13
1372064_at	-2.543239077	12.07607964	-20.26983984	5.08E-07	1.74E-05	6.685374844	Cxcl16
1368760_at	-11.2958962	7.862398917	-221.4587386	1.31E-13	1.36E-09	19.85803425	Cxcl2
1370633_at	-10.34421476	8.211080925	-112.6096395	9.66E-12	2.15E-08	17.58177709	Cxcl3
1387648_at	-5.334183094	5.325071721	-17.28134477	1.38E-06	3.47E-05	5.551401955	Cxcl6
1373544_at	-9.987420036	7.147093987	-194.6339603	2.97E-13	1.85E-09	19.54767344	Cxcl9
1367940_at	-1.793421796	8.128604582	-14.08597295	4.92E-06	8.87E-05	4.102085628	Cxcr7
1372846_at	1.004511581	8.195571494	7.754696397	0.000180773	0.00133237	-0.014501491	Cyb561a3
1379344_at	-1.074912669	12.3702666	-17.02029399	1.52E-06	3.68E-05	5.443256655	Cybb
1398533_at	1.040009777	6.247093844	7.452295122	0.000227735	0.001608523	-0.277517168	Cyfip2
1370269_at	-8.070850127	6.214023865	-61.2502845	4.64E-10	2.06E-07	14.24094307	Cyp1a1
1368990_at	-1.205364361	12.92613004	-14.37414723	4.34E-06	8.09E-05	4.245226002	Cyp1b1
1384392_at	1.674593826	8.852444806	17.49949486	1.27E-06	3.31E-05	5.640546033	Cyp26b1
1387914_at	-3.933564373	5.74247919	-10.89113215	2.38E-05	0.000280586	2.298197612	Cyp27a1
1367979_s_at	1.469008541	11.27933282	46.63880631	2.62E-09	5.33E-07	12.48219045	Cyp51
1388188_at	-3.002304537	6.461952356	-11.46360191	1.75E-05	0.000222738	2.654853967	Cyp7b1
1368290_at	1.569953802	10.94106708	7.214842787	0.000274508	0.001861517	-0.490099991	Cyr61
1388712_at	1.251690341	7.838594577	13.44824402	6.55E-06	0.000110079	3.775103949	Cyth3
1386410_at	1.047193402	2.700195535	7.086221369	0.000304373	0.002016554	-0.607564683	Cytip
1384225_at	1.602391071	7.494722549	15.58758182	2.62E-06	5.53E-05	4.819120133	Dab1
1382440_at	1.685795018	7.842640215	14.0398914	5.02E-06	9.01E-05	4.078936559	Daglb
1376788_at	-1.419559975	7.721806393	-19.28447005	6.94E-07	2.16E-05	6.33106617	Dapk1
1387800_at	-2.88422581	8.366108577	-34.29243343	1.84E-08	1.84E-06	10.39016749	Daxx
1388657_at	1.594923153	4.750015635	11.47810186	1.73E-05	0.000221481	2.663673829	Dchs1
1370308_at	1.283336672	9.351247866	12.6595887	9.50E-06	0.000142516	3.349766008	Dctpp1
1387111_at	1.388320497	9.481205768	12.53514804	1.01E-05	0.000148963	3.28038309	Ddah1
1369590_a_at	-2.889737262	11.10988709	-39.0498993	8.08E-09	1.05E-06	11.28444102	Ddit3
1368013_at	-1.260233103	7.391503163	-10.3927421	3.17E-05	0.00034642	1.973523567	Ddit4l /// LOC100363484
1368673_at	-1.22845201	6.531537757	-7.538254333	0.0002131	0.001523185	-0.201891232	Ddr2
1391463_at	-3.835170882	10.89428128	-26.64473437	9.08E-08	5.40E-06	8.623798564	Ddx58
1381556_at	-3.917672588	11.89216103	-15.503088	2.71E-06	5.65E-05	4.780583793	Ddx60
1367777_at	1.130468576	11.73405197	42.89042311	4.46E-09	7.13E-07	11.92120507	Decr1
1380021_at	-1.314260398	3.361834841	-6.588111498	0.00046076	0.002810253	-1.078619064	Dennd2d
1379703_at	-1.917565436	7.840353741	-26.45512318	9.49E-08	5.53E-06	8.573400681	Dennd3
1376914_at	2.349223288	8.141881285	17.9514241	1.09E-06	2.97E-05	5.821776259	Depdc1
1390892_at	3.044860494	5.253122532	32.63038975	2.52E-08	2.21E-06	10.04504129	Depdc1b
1374758_at	3.380195948	5.841686715	19.66429853	6.14E-07	1.98E-05	6.469749244	Deptor
1368189_at	1.235567772	9.392588854	18.73681278	8.32E-07	2.43E-05	6.126215335	Dhcr7
1383536_at	1.544142788	7.319866666	15.1229689	3.17E-06	6.36E-05	4.604657875	Dhfr
1385439_x_at	-4.413677799	8.726817821	-73.93078134	1.40E-10	1.00E-07	15.37680428	Dhx58
1376377_at	2.190141937	8.410435672	36.11727778	1.32E-08	1.48E-06	10.74858814	Diaph3
1390127_at	1.602813361	7.244668502	10.90240773	2.37E-05	0.00027978	2.305386077	Dixdc1
1368944_at	-1.66996614	6.695944947	-4.283858036	0.004530877	0.018757249	-3.651097793	Dlg1
1387210_at	-1.888242196	5.742430291	-11.60504665	1.62E-05	0.000211705	2.740455092	Dlg4
1376684_at	1.559708073	8.507020563	19.00703236	7.60E-07	2.30E-05	6.228028001	Dlgap5
1383302_at	-1.037021605	9.147437806	-15.31369373	2.93E-06	5.99E-05	4.693457883	Dnajb1
1389290_at	1.536220872	10.13680288	24.79400236	1.43E-07	7.32E-06	8.115057039	Dnajc10
1369813_at	-1.086881023	6.753633732	-22.45630314	2.67E-07	1.09E-05	7.413100625	Dnajc5
1373772_at	1.249636915	9.524953247	15.2601645	2.99E-06	6.10E-05	4.668643706	Dnmt1
1384804_at	1.010347914	7.113118351	7.244281295	0.000268151	0.001826778	-0.463446536	Dnmt3a
1385143_at	1.026078716	9.822996492	21.60672193	3.40E-07	1.30E-05	7.139254482	Dock10
1370905_at	1.120540543	6.77597389	3.892055994	0.007182042	0.027520246	-4.161598946	Dock9
1384292_at	-1.514193934	8.554246473	-18.78217597	8.19E-07	2.41E-05	6.143409129	Dok1
1380512_at	2.409099843	4.577529803	12.44868604	1.05E-05	0.0001539	3.231794354	Dpep2
1372504_at	1.073458139	9.354395739	8.66672488	9.40E-05	0.00080218	0.730666328	Dpm3 /// LOC100910177
1376183_at	1.176073962	5.717227177	4.68943476	0.00288088	0.012737062	-3.145993871	Dpp6
1378860_at	1.448345137	9.707856912	19.65606231	6.16E-07	1.98E-05	6.466770637	Dpy19l3
1388101_at	1.075820864	8.26304844	9.183124884	6.67E-05	0.000612585	1.123636018	Dpysl3
1371049_at	1.354872798	8.523827668	16.18373294	2.08E-06	4.60E-05	5.085372809	Dpysl4
1389732_at	-2.539425529	8.000093203	-13.40215269	6.69E-06	0.000111506	3.750903273	Dram1
1397400_at	2.659448766	7.63173646	22.0381299	3.00E-07	1.19E-05	7.279655827	Draxin
1375936_at	-3.346448403	5.021133162	-16.7501605	1.68E-06	3.95E-05	5.329615991	Dsc2
1374805_at	1.445042136	7.957817651	13.85184039	5.45E-06	9.60E-05	3.983710189	Dscc1
1376130_a_at	-2.497236043	7.332516998	-58.87689712	5.96E-10	2.30E-07	13.99332034	Dtnb
1374718_at	-2.990817669	10.95045816	-63.67901584	3.62E-10	1.82E-07	14.4817393	Dtx3l
1373324_at	1.145988657	7.704308041	14.28837642	4.50E-06	8.32E-05	4.202912028	Dusp14
1385912_at	1.059166954	7.663311516	8.550727446	0.000101855	0.000853343	0.6396478	Dusp15
1377023_at	-5.188420617	5.831739407	-59.03839001	5.86E-10	2.30E-07	14.01057431	Dusp2
1377300_at	1.392925781	7.237638751	5.316353269	0.00149716	0.007334619	-2.411300505	Dusp3 /// LOC100365414
1387865_at	1.635213881	11.04164907	23.77903451	1.86E-07	8.62E-06	7.819036367	Dut
1390028_at	1.094349275	8.803790215	15.07139303	3.23E-06	6.47E-05	4.580458322	Dyrk2
1382511_at	1.731450417	7.007218398	16.44728115	1.88E-06	4.27E-05	5.200039383	E2f1
1382472_at	1.581501232	5.285798599	7.518055601	0.00021644	0.001542758	-0.219599419	E2f2
1378537_at	1.94646806	4.602232526	6.584233034	0.000462294	0.002817894	-1.082391376	E2f7
1377410_at	2.2128164	5.220326082	17.95353514	1.09E-06	2.97E-05	5.822612164	E2f8
1391453_at	-3.547952082	10.95511446	-37.12754832	1.11E-08	1.34E-06	10.93850454	Ebi3
1393401_at	-4.303860781	4.883423258	-40.50845197	6.40E-09	8.97E-07	11.53435281	Ecscr
1383747_at	1.730553553	10.50576705	20.04928176	5.44E-07	1.82E-05	6.607596689	Ect2
1375189_at	-1.113324635	13.77035081	-22.01743845	3.02E-07	1.19E-05	7.272985978	Edf1
1369519_at	2.061775361	4.040534762	8.127196187	0.000137396	0.001075981	0.298227323	Edn1
1383641_at	1.647583332	9.907952338	19.76043917	5.96E-07	1.95E-05	6.504425916	Ednra
1369638_at	1.209240492	7.962269524	8.77788945	8.72E-05	0.000755536	0.816925164	Eef2k
1390285_at	1.242884511	3.994103303	4.276883414	0.004567262	0.018882913	-3.659992306	Efcab4a /// LOC100911692
1390112_at	1.452426228	10.33328957	8.701844266	9.18E-05	0.000786562	0.758018871	Efemp1
1384175_at	1.807194711	3.963714156	6.989775871	0.000329208	0.002143192	-0.696740925	Efna4
1389206_at	-1.153383115	8.594399657	-19.53519315	6.40E-07	2.04E-05	6.422913922	Efr3b
1393433_at	1.850304305	3.759622796	7.34223024	0.00024818	0.001718965	-0.375375658	Egflam
1387306_a_at	1.090848867	8.581016041	4.903948614	0.002289	0.010480801	-2.888402716	Egr2
1388623_at	-1.19537506	7.98988561	-12.32520467	1.12E-05	0.000160819	3.161851623	Ehd1
1387242_at	-2.738524227	11.78696775	-23.79658584	1.85E-07	8.59E-06	7.824265356	Eif2ak2
1386888_at	-1.515872407	10.21387359	-17.9070995	1.10E-06	2.99E-05	5.804202493	Eif4ebp1
1388714_at	-1.134830562	9.24916127	-11.28433334	1.92E-05	0.000238517	2.544955132	Ell /// LOC100911828
1389680_at	-1.967418854	7.937967718	-15.0873969	3.21E-06	6.44E-05	4.587975945	Ell2
1388108_at	1.452743123	9.181449796	16.03473266	2.20E-06	4.81E-05	5.019734108	Elovl6
1390174_at	1.10427568	7.07963993	21.44624615	3.56E-07	1.34E-05	7.086298712	Eml1
1370544_at	-1.599545648	7.404253512	-13.1395562	7.56E-06	0.000120997	3.611501247	Eml2
1397552_at	1.011423086	7.333046508	4.638148476	0.003046643	0.013348486	-3.208553408	Eml4
1370341_at	-1.05750171	10.7683704	-19.22266494	7.08E-07	2.19E-05	6.308241229	Eno2 /// LOC100911625
1384198_at	-1.018232107	7.202229733	-4.271914129	0.004593384	0.018965699	-3.666333775	Enox2
1368512_a_at	-1.630443328	8.315293353	-11.7137751	1.53E-05	0.000202875	2.805604876	Enpep /// LOC100910501
1370047_at	1.259889975	5.104915369	5.484633001	0.001267063	0.006389554	-2.223273711	Enpp1
1367905_at	-2.811245446	6.601860167	-28.28167586	6.23E-08	4.09E-06	9.043831259	Enpp3
1373912_at	-2.795355576	9.576382018	-42.38945803	4.80E-09	7.30E-07	11.84192637	Enpp4
1382434_at	-1.231452589	7.307234868	-15.02005837	3.30E-06	6.58E-05	4.556292294	Entpd5
1398333_at	-1.303220907	13.06348442	-13.61475435	6.07E-06	0.000104222	3.861880271	Epas1
1392607_at	1.359495465	3.291913055	9.160294624	6.77E-05	0.000620052	1.106670183	Epb4.1
1385053_at	1.016512284	6.938385881	6.892077872	0.000356747	0.002290828	-0.788051809	Epha3
1369096_at	1.960876381	3.810263974	7.782629396	0.000177024	0.001311092	0.009371912	Epha7
1399152_at	-1.084193328	10.63616148	-20.83049903	4.28E-07	1.53E-05	6.879306464	Eps15
1385213_at	-2.620453963	9.498923624	-36.92833675	1.15E-08	1.36E-06	10.90151403	Epsti1
1385781_at	2.423940258	5.806592186	11.59134036	1.63E-05	0.000212646	2.732202368	Ercc6l
1381252_at	1.012856959	6.734688526	7.211131981	0.000275321	0.001865813	-0.493465809	Eri2
1389297_at	-2.602153346	9.101514908	-34.13264133	1.90E-08	1.85E-06	10.35778852	Ero1l
1397704_at	1.71768767	8.796654284	14.08407914	4.92E-06	8.87E-05	4.101135699	Esco2
1368078_at	-1.848612842	11.24894951	-17.79917625	1.15E-06	3.06E-05	5.761232268	Esm1
1376084_a_at	1.769032373	7.54598336	21.26438044	3.76E-07	1.40E-05	7.025795696	Espl1
1371710_at	-1.170475428	12.04149979	-13.1431251	7.54E-06	0.000120873	3.613413444	Etnk1
1372564_at	-1.115740526	8.627961911	-8.231947035	0.000127437	0.00102038	0.384032546	Ets2
1391241_at	1.093326268	8.737005409	8.215766809	0.00012892	0.001028019	0.370838362	Etv1
1385294_at	-1.096122935	6.334442462	-4.106735961	0.005563873	0.02218629	-3.879154357	Etv6
1385733_at	2.618694348	5.677161635	6.389757492	0.000547212	0.003226724	-1.273699903	Exo1
1379425_at	-1.862079124	8.969151952	-35.20302264	1.56E-08	1.64E-06	10.57157686	Exo5
1395697_at	1.2092856	8.695494979	14.99818559	3.33E-06	6.62E-05	4.545971318	Ezh2
1369852_at	-8.264827892	6.935282854	-140.8891491	2.32E-12	6.57E-09	18.51815892	F10
1367899_at	1.47277337	10.99378179	23.60842213	1.95E-07	8.92E-06	7.767998438	F2r
1374320_at	2.070712174	4.26912336	9.473247306	5.53E-05	0.000529573	1.336097269	F5
1367660_at	1.733813404	9.443295475	23.11903394	2.22E-07	9.63E-06	7.619467494	Fabp3
1373266_at	3.165255485	9.321277486	27.6414026	7.20E-08	4.60E-06	8.882666305	Fam107a
1389146_at	1.512334255	8.151693228	10.88299847	2.40E-05	0.00028165	2.293007981	Fam107b
1385251_at	-4.248125266	4.233705127	-16.197477	2.07E-06	4.60E-05	5.091397672	Fam110c
1371970_at	1.27650542	9.036265553	10.89563745	2.38E-05	0.0002802	2.301070665	Fam111a
1376177_at	1.088672447	5.469298992	3.371923574	0.013725213	0.047537632	-4.872018017	Fam117a
1378400_at	1.380500436	5.049599028	10.72931149	2.61E-05	0.000301027	2.194281107	Fam122b /// LOC100909732
1387454_at	-1.983763855	3.16179405	-7.787346045	0.0001764	0.001307092	0.013396179	Fam129a
1392510_at	2.423175859	8.672210282	20.59382875	4.60E-07	1.62E-05	6.798093279	Fam180a
1391944_at	1.385543371	5.204723114	4.243466261	0.004746165	0.019503301	-3.702705869	Fam184a
1389007_at	1.509479671	5.256488231	7.372459621	0.000242363	0.001688453	-0.348383023	Fam189a2
1398387_at	2.961614885	8.228843623	20.39217932	4.89E-07	1.69E-05	6.728149985	Fam198b
1379367_at	-1.391481353	7.859582426	-10.55829807	2.88E-05	0.000323212	2.082906304	Fam213b
1391214_at	-4.331371492	4.958365866	-33.68106614	2.06E-08	1.95E-06	10.26538064	Fam26f
1390403_at	-1.205099997	9.374939837	-21.88986492	3.13E-07	1.22E-05	7.231721243	Fam43a
1394940_at	-2.990187627	9.773094245	-35.83409966	1.39E-08	1.53E-06	10.69429566	Fam46a
1384081_at	1.427019956	3.710180537	3.501561205	0.011634506	0.041237918	-4.691678959	Fam46b
1394470_at	-1.72256432	6.887488563	-16.51460135	1.83E-06	4.19E-05	5.229041122	Fam49a
1376831_at	2.293347256	8.564717032	18.7228318	8.35E-07	2.44E-05	6.120907815	Fam64a
1391741_a_at	1.736153782	3.707827855	8.032641981	0.000147156	0.001133897	0.219981989	Fam78a
1394031_at	2.409289023	3.976046216	20.76078521	4.37E-07	1.55E-05	6.855481567	Fam83d
1374699_at	1.389352369	10.42497236	15.55885334	2.65E-06	5.57E-05	4.806040335	Fam84a
1377307_at	1.48797623	7.113326623	9.109806535	6.99E-05	0.000635645	1.069020476	Fam89a
1377718_at	1.849017351	4.358870902	7.846781037	0.000168747	0.001262416	0.063936563	Fancb
1378240_at	1.671760838	7.29412435	17.06458799	1.49E-06	3.64E-05	5.461720916	Fancd2
1369422_at	1.481555842	3.551328205	7.753285824	0.000180964	0.00133237	-0.015708918	Fap
1384842_s_at	-3.052999656	9.11737811	-85.6539992	5.50E-11	5.52E-08	16.20694812	Fas
1367707_at	1.634418195	9.18358599	18.87691333	7.94E-07	2.36E-05	6.179183735	Fasn
1394550_at	-3.570374759	6.524259437	-32.36769019	2.65E-08	2.26E-06	9.988744198	Faxdc2
1373286_at	1.010691101	7.354198667	8.828229474	8.43E-05	0.000735707	0.855680243	Fblim1
1389533_at	1.21797657	9.330076769	12.06916811	1.27E-05	0.000177269	3.014717976	Fbln2
1367866_at	5.292575517	4.916395907	65.29549316	3.09E-10	1.66E-07	14.63538795	Fbln5
1370037_at	3.987164443	5.270555195	33.41994257	2.17E-08	2.00E-06	10.21132611	Fbn2
1372776_at	-1.835093134	11.01749183	-52.19247541	1.28E-09	3.76E-07	13.22181559	Fbxl5
1375041_at	-3.094126491	6.246825421	-13.22485444	7.26E-06	0.000117797	3.657069719	Fbxo27
1384502_at	-2.423767337	4.551803648	-22.28082105	2.80E-07	1.13E-05	7.357413425	Fbxo42
1384988_at	1.0348086	7.407454733	14.10004516	4.89E-06	8.84E-05	4.109140366	Fbxo5
1384457_at	-2.794650295	9.094897528	-27.39099655	7.62E-08	4.79E-06	8.818561911	Fbxw17
1393038_at	-2.077826796	11.5416155	-31.09523793	3.42E-08	2.71E-06	9.708874935	Fcgr1a
1367850_at	-1.43558304	14.26056519	-35.11127468	1.58E-08	1.65E-06	10.55353376	Fcgr2a /// LOC100911825 /// LOC100912061 /// LOC100912098 /// LOC498276
1371079_at	-3.78403329	6.203051597	-26.38471301	9.65E-08	5.56E-06	8.554589578	Fcgr2b
1373523_at	-3.762571769	12.09718715	-43.41466462	4.13E-09	6.94E-07	12.00303014	Fcgr3a
1387885_at	1.309621589	9.962608675	11.08756008	2.14E-05	0.000259334	2.422467025	Fcgrt
1395126_at	2.380837772	12.63651058	17.34135486	1.35E-06	3.42E-05	5.576034543	Fcrl2
1389906_at	1.211255231	7.417776246	9.000456721	7.51E-05	0.000672072	0.986854013	Fdft1
1367667_at	1.105276044	11.51680071	20.67246103	4.49E-07	1.59E-05	6.825180072	Fdps
1368011_at	1.208121682	3.889233722	7.571620276	0.00020771	0.001492856	-0.172722782	Fdxr
1367983_at	1.475232922	8.581782482	21.1568697	3.88E-07	1.43E-05	6.989781606	Fen1
1381882_at	-1.529327656	4.71543514	-6.173067018	0.000663428	0.00376152	-1.49196003	Fgd6
1368349_at	4.963067504	5.326004642	21.73044669	3.28E-07	1.26E-05	7.1798104	Fgfbp1
1377878_at	1.754419458	8.583467968	14.07467747	4.94E-06	8.90E-05	4.096418054	Fgfbp3
1370623_at	-1.289351634	5.915130151	-8.219579375	0.000128568	0.001026546	0.373949274	Fgl2
1368693_at	-2.984181997	4.23972425	-23.69519656	1.90E-07	8.76E-06	7.794003918	Fgr
1372107_at	1.642222586	11.55934815	27.90950885	6.77E-08	4.39E-06	8.950626915	Fhl1
1374667_at	3.437600673	5.597718852	37.5251293	1.04E-08	1.27E-06	11.01167202	Fhod3
1379463_at	2.48723914	4.165325519	6.20754224	0.000643191	0.003668181	-1.456867903	Filip1
1376937_at	-1.052332321	8.552927157	-15.34597543	2.89E-06	5.93E-05	4.708381883	Filip1l
1394392_at	1.054654645	6.257072579	7.075958718	0.000306912	0.002030776	-0.617008777	Fitm2
1370132_at	1.105285103	7.269699851	6.255679554	0.000616096	0.003548143	-1.408103394	Fkbp1b
1388401_at	1.384841479	9.761223069	15.89777133	2.32E-06	5.03E-05	4.958871635	Flnb /// LOC100911261
1388496_at	2.247186332	9.854271063	21.86499775	3.15E-07	1.23E-05	7.223649219	Flnc
1376036_at	-1.902721134	3.213444089	-23.09745832	2.23E-07	9.65E-06	7.612845086	Flvcr2
1373252_at	1.036202963	7.382406085	7.338745625	0.000248861	0.001721762	-0.378492837	Fmnl3 /// LOC100912815
1383248_at	-2.361972898	7.955174603	-31.42626964	3.20E-08	2.64E-06	9.782856662	Fmo5
1367700_at	1.948165617	5.764365595	12.30405625	1.13E-05	0.000162074	3.14980703	Fmod
1392751_at	-2.170307649	5.965428457	-10.11872076	3.72E-05	0.000392364	1.788990661	Fndc3c1
1390348_at	1.001266864	10.92846507	10.72795838	2.61E-05	0.000301146	2.193406201	Folr2
1368489_at	-1.710568746	6.959073799	-15.58753132	2.62E-06	5.53E-05	4.819097162	Fosl1
1383860_at	-2.893005238	3.678949063	-14.01300342	5.08E-06	9.08E-05	4.065395789	Fosl2
1369018_at	1.682938512	6.319798074	12.4514139	1.05E-05	0.000153889	3.233332137	Foxm1
1380387_at	1.641050466	6.810768908	7.459769413	0.000226418	0.001601402	-0.270913707	Foxp2
1377011_at	1.698157619	5.145798305	7.274617718	0.000261776	0.001794353	-0.436069344	Fry
1387843_at	-1.894857981	6.592002609	-10.7372211	2.60E-05	0.000300575	2.199393383	Fst
1385170_at	1.077121294	4.468435573	5.259913224	0.001584622	0.007677232	-2.475214543	Fstl5
1376580_at	1.156139408	9.057557954	17.45115823	1.30E-06	3.35E-05	5.620888935	Fxn
1387799_at	1.901293594	6.529245963	17.12957151	1.46E-06	3.59E-05	5.488724507	Fxyd2
1370248_at	1.563454891	8.380753673	20.49749096	4.73E-07	1.65E-05	6.764764616	Fxyd6
1391979_at	-1.195709678	10.82620545	-12.77999632	8.96E-06	0.000136742	3.416293432	Fyb
1373937_at	-1.229032104	9.612311554	-13.15590794	7.50E-06	0.000120461	3.620258393	Fyco1
1388039_a_at	1.547788655	8.713172942	10.5106038	2.96E-05	0.000329502	2.051554127	Gabbr1
1368344_at	-2.642130622	7.93205064	-26.98300291	8.38E-08	5.10E-06	8.712782294	Gad1
1368947_at	-1.114297851	11.53418263	-13.88763621	5.37E-06	9.49E-05	4.001931428	Gadd45a
1372016_at	-1.737367301	9.420157002	-17.36829096	1.34E-06	3.41E-05	5.58706377	Gadd45b
1376790_at	2.25497096	9.441052236	46.46634637	2.68E-09	5.35E-07	12.45755703	Galc
1383021_at	1.324509469	2.877935897	8.416945415	0.000111799	0.000918517	0.533367147	Galnt13
1374759_at	1.63277491	9.133411123	18.40682089	9.29E-07	2.64E-05	5.999876975	Galnt16
1368253_at	1.188436189	10.51291175	19.30863217	6.89E-07	2.14E-05	6.339969458	Gamt
1367930_at	1.125231672	11.86456434	45.30311005	3.15E-09	5.90E-07	12.28853926	Gap43
1395730_at	-1.972825303	6.861791988	-5.366290091	0.001424295	0.007038638	-2.355109114	Gars
1374216_at	1.342747457	6.645568124	12.73562345	9.16E-06	0.000138897	3.391845415	Gas2l3
1370963_at	-1.402459472	7.630281248	-12.44138356	1.06E-05	0.000154239	3.227676148	Gas7
1382866_at	1.631179354	7.428221583	6.151672632	0.000676349	0.003819464	-1.513808046	Gatc
1367627_at	1.623531565	10.72023353	10.60197999	2.81E-05	0.000316481	2.111508983	Gatm
1368332_at	-3.946338529	13.90366231	-102.0275811	1.81E-11	3.52E-08	17.11350193	Gbp2
1385051_at	-6.883301578	8.546545184	-17.47776411	1.28E-06	3.33E-05	5.631715416	Gbp4 /// LOC100911495
1370522_at	-1.276961027	6.941474774	-19.02543171	7.56E-07	2.29E-05	6.234907801	Gcgr
1387221_at	-6.544747957	7.93580458	-34.03656676	1.93E-08	1.88E-06	10.33824076	Gch1
1374903_at	-1.065181108	8.033406486	-7.731077383	0.000184013	0.001349039	-0.034742584	Gcnt2
1387659_at	-1.647870779	10.00276348	-12.65913658	9.50E-06	0.000142516	3.349515088	Gda
1370153_at	-2.141534212	8.54174523	-12.39221699	1.08E-05	0.000157004	3.199889837	Gdf15
1374665_at	1.299924326	7.010573605	7.992695252	0.000151516	0.001160592	0.186696188	Gemin4
1368470_at	1.236315784	10.58841408	28.43963243	6.01E-08	4.00E-06	9.082998014	Ggh
1375874_at	-1.273556074	10.73180238	-39.61370401	7.38E-09	9.76E-07	11.38227867	Ginm1
1376231_at	2.206339431	8.156728733	29.26312232	5.02E-08	3.51E-06	9.2835235	Gins1
1384139_at	1.026235269	8.584418466	12.41965902	1.07E-05	0.000155538	3.215411288	Gjc1
1386908_at	-2.395665847	12.83577379	-83.22317193	6.61E-11	6.23E-08	16.04909667	Glrx
1382616_at	-1.147239436	2.711596909	-23.39016566	2.06E-07	9.25E-06	7.702151681	Gls
1370375_at	2.31485784	7.303052238	10.66404991	2.71E-05	0.000308605	2.151969387	Gls2
1367633_at	-1.561856693	10.41037988	-12.71576699	9.25E-06	0.000139803	3.380879201	Glul
1371803_at	1.142908989	11.16265385	11.22364997	1.99E-05	0.000244675	2.507390621	Gm2a
1378056_at	1.226280356	9.764750405	10.18533514	3.58E-05	0.000380477	1.8342584	Gmnn
1386914_at	3.443115087	6.33130567	26.59458359	9.18E-08	5.45E-06	8.610505318	Gmpr
1380373_at	-1.389236585	6.925040951	-4.410808991	0.00392196	0.016585402	-3.490433445	Gmps
1381557_at	-1.06087642	9.648280813	-10.93673912	2.32E-05	0.000275845	2.327231632	Gna14
1368030_at	-1.584544308	6.124205354	-4.482135996	0.00362026	0.015480058	-3.401189722	Gnai1 /// Gnai3
1368879_a_at	1.431369308	6.849838587	5.924613944	0.000832619	0.004513443	-1.749074697	Gnao1
1392905_at	-2.13894916	8.959255878	-13.13141764	7.59E-06	0.000121351	3.607138814	Gng2
1379295_at	1.120869555	10.14064726	15.08867595	3.21E-06	6.44E-05	4.588576432	Gngt2
1368890_at	1.51410381	8.179070558	26.29400603	9.87E-08	5.64E-06	8.530278316	Gnpat
1387979_at	-1.0752878	7.885507527	-11.33216788	1.87E-05	0.000234191	2.574435586	Golgb1
1390050_at	2.400479927	8.216123841	32.72337242	2.48E-08	2.19E-06	10.06484996	Golm1
1369571_at	-1.025234892	6.774753949	-6.604097187	0.000454499	0.002781826	-1.063088422	Golph3
1367852_s_at	1.324824576	6.803174581	13.18017822	7.41E-06	0.000119532	3.633237343	Gp1bb /// Sept5
1382986_at	-1.708519337	6.467023433	-8.768913537	8.77E-05	0.000758723	0.809994954	Gpam
1368395_at	1.239772784	3.866782686	3.699304922	0.009086482	0.033481101	-4.420693394	Gpc3
1384602_at	-1.340049564	4.773119293	-10.2356052	3.47E-05	0.000372	1.868244442	Gpr107
1391690_at	-2.896764363	4.955634625	-7.134553343	0.000292736	0.001956965	-0.563230713	Gpr114
1379867_at	1.135430638	4.825115232	6.761112633	0.00039788	0.002499229	-0.912026647	Gpr123
1385025_a_at	-1.02235937	7.379198308	-8.256657558	0.00012521	0.001006173	0.404141048	Gpr137b
1374648_at	2.087839349	6.996152468	23.51621727	2.00E-07	9.04E-06	7.740257465	Gpr155
1393682_at	3.468146463	8.32765525	17.79664913	1.15E-06	3.06E-05	5.760222989	Gpr34
1385605_at	-1.376160569	8.514388821	-21.24412341	3.78E-07	1.40E-05	7.019024112	Gpr84
1387241_at	-2.038145136	3.391061962	-15.85276403	2.36E-06	5.10E-05	4.938759769	Gpr88
1369926_at	3.206363384	8.445049492	22.46699933	2.66E-07	1.09E-05	7.416480545	Gpx3
1374488_at	-1.659570546	7.581452632	-15.39612569	2.83E-06	5.85E-05	4.731506332	Gramd1b
1371517_at	1.209647568	9.02982661	15.46457898	2.76E-06	5.73E-05	4.762952695	Grb10
1368401_at	1.110044711	10.70498585	22.72101592	2.48E-07	1.04E-05	7.49626793	Gria2
1396696_at	1.269274458	6.980221615	7.985816506	0.000152282	0.001165595	0.180950587	Gria4
1388189_at	-1.80986071	5.128918961	-5.914255829	0.000840669	0.004549942	-1.759957269	Grm3
1393665_at	1.801351517	3.93189188	5.751517915	0.000979465	0.005168909	-1.932690239	Grm5
1382181_at	-3.771014827	9.040088115	-74.6543228	1.32E-10	1.00E-07	15.43344283	Gsap
1385001_at	-1.787501194	7.696255894	-29.92098672	4.36E-08	3.21E-06	9.439452062	Gsdmd
1369061_at	-1.890779101	7.120157993	-10.50581744	2.97E-05	0.000329814	2.048400695	Gsr
1367774_at	-2.862014479	10.90342532	-43.7974349	3.90E-09	6.70E-07	12.06205435	Gsta1
1371942_at	2.105838285	4.419977233	17.79635192	1.15E-06	3.06E-05	5.760104283	Gstt3
1368233_at	-1.014936128	8.972590672	-14.19325241	4.69E-06	8.57E-05	4.155697977	Gtf2f2
1375447_at	-1.522136724	3.379878562	-4.685652633	0.002892753	0.012776841	-3.150594445	Gtpbp1
1374489_at	-1.252153554	7.533744967	-8.755607237	8.85E-05	0.000763255	0.799710135	Gtpbp2
1369097_s_at	1.093622976	8.488795323	6.913692361	0.000350435	0.002257287	-0.76776486	Gucy1b3
1367901_at	1.982577568	9.73090393	28.88975656	5.44E-08	3.74E-06	9.193358567	Gusb
1374541_at	-1.236964544	7.856812001	-12.12075826	1.24E-05	0.00017394	3.044597149	Gys1
1371376_at	1.367180028	5.517040101	10.16016038	3.63E-05	0.000385021	1.817182101	H1fx
1374293_at	1.018163065	11.12525837	8.142740681	0.000135863	0.00106751	0.311018324	H2afj /// LOC100910152
1390384_at	1.651661217	9.188832527	26.54628538	9.29E-08	5.48E-06	8.597678278	H2afx
1383897_at	1.105896662	8.760039111	4.227563314	0.004834031	0.019798964	-3.723089662	H2afy2
1376837_at	-1.739663697	6.03624658	-13.302535	7.00E-06	0.000114937	3.69832729	H6pd
1395533_at	-1.863439015	6.943002242	-4.420462226	0.003879533	0.016432797	-3.478312265	Hars
1387548_at	-5.135901504	8.06841503	-15.37037117	2.86E-06	5.89E-05	4.71963998	Has2
1374802_at	1.524134449	7.695562494	8.237986481	0.000126888	0.001016773	0.388951873	Haus4
1372349_at	1.171340892	8.79807807	10.64481293	2.74E-05	0.000311013	2.139452541	Haus7
1369204_at	-2.624500359	10.43001218	-43.06259614	4.34E-09	7.10E-07	11.94820531	Hck
1380521_at	-2.497179702	9.642973413	-19.15130859	7.25E-07	2.22E-05	6.281797431	Hcls1
1372898_at	-1.489781204	6.251985541	-7.201234364	0.000277504	0.001877437	-0.502449929	Heatr6
1372004_at	-1.443584243	11.24196085	-15.28040926	2.97E-06	6.06E-05	4.678038335	Hebp1
1393331_at	-1.013844577	8.642869413	-23.46113524	2.02E-07	9.15E-06	7.723631903	Heca
1373415_at	1.130030158	10.14567521	11.36005281	1.84E-05	0.000231617	2.591568436	Heg1
1393684_at	1.006645695	8.731815727	9.022542846	7.41E-05	0.000664244	1.003518933	Hells /// LOC100911660
1390531_at	-5.95108038	6.240270372	-78.57871653	9.52E-11	8.23E-08	15.72752758	Helz2
1368533_at	4.189818645	5.159721409	34.97298132	1.62E-08	1.66E-06	10.52623872	Heph
1382902_at	-6.301446679	8.722490246	-85.92564426	5.39E-11	5.52E-08	16.22416751	Herc6
1373222_at	1.017342561	12.37554017	26.28872574	9.88E-08	5.64E-06	8.528860392	Hexa
1387701_at	-1.052480901	3.278766895	-3.674988183	0.009363916	0.034311339	-4.453739546	Hgf
1387270_at	2.2831728	6.143430395	13.67148634	5.92E-06	0.000102288	3.891215625	Hhex
1374898_at	1.073256352	7.198309506	8.17395326	0.000132844	0.00105096	0.336640837	Hid1
1387076_at	-1.178758556	13.72874497	-15.26138954	2.99E-06	6.10E-05	4.669212531	Hif1a
1392941_at	1.395485919	9.668701355	24.18638345	1.67E-07	8.09E-06	7.939381993	Hip1
1376692_at	1.163173602	8.919621121	10.02116436	3.95E-05	0.000410687	1.722213973	Hipk2
1390021_at	-1.131626547	12.94350334	-13.40520267	6.68E-06	0.000111495	3.752507134	Hist1h2bcl1 /// Hist1h2bh /// Hist1h2bl /// LOC100364835 /// LOC100365043 /// LOC100910200 /// LOC100912338 /// LOC684797
1386059_at	1.767799065	7.721836876	19.08270367	7.41E-07	2.26E-05	6.256280172	Hist2h2be
1381208_at	1.365377056	9.071006993	11.92721774	1.37E-05	0.000186832	2.93188837	Hist3h2a
1369006_at	-2.216135172	3.34198275	-6.656402412	0.000434677	0.00268002	-1.012468451	Hk2
1393672_at	4.578599835	4.459625663	22.24296247	2.83E-07	1.14E-05	7.345340707	Hmcn1
1367676_at	1.067576156	13.87505153	12.81500644	8.82E-06	0.000134991	3.435526602	Hmgb2 /// Hmgb2l1 /// LOC100911856 /// LOC100912122 /// RGD1559962 /// RGD1561694
1371887_at	1.341521745	10.83821556	35.24222435	1.55E-08	1.64E-06	10.57927046	Hmgb3 /// LOC100912369 /// LOC688583
1367932_at	1.328256036	12.63616789	33.32795166	2.20E-08	2.02E-06	10.19217351	Hmgcs1
1373433_at	1.410920255	9.01680845	10.6316259	2.76E-05	0.000312527	2.130860375	Hmgn5 /// Hmgn5b
1370462_at	1.955072095	8.333898592	18.49408036	9.02E-07	2.59E-05	6.033502587	Hmmr
1370080_at	-2.529952751	13.30744531	-22.26359703	2.82E-07	1.13E-05	7.35192346	Hmox1
1370065_at	-1.906140191	4.285265625	-13.57816227	6.17E-06	0.000105619	3.842897235	Hpx
1374029_at	2.035362516	8.115079289	12.45091751	1.05E-05	0.000153889	3.233052331	Hrct1
1386953_at	-1.897013754	9.444419124	-24.56195763	1.52E-07	7.63E-06	8.048499541	Hsd11b1
1368102_at	-3.26757075	3.976084573	-8.875118781	8.17E-05	0.00071795	0.891608859	Hsd11b2
1367672_at	1.048631676	10.76624782	19.1516094	7.25E-07	2.22E-05	6.281909113	Hsd17b4
1389430_at	2.659383073	6.629240881	21.58993705	3.42E-07	1.30E-05	7.133734352	Hsd17b7
1396993_at	-1.385080379	2.8058496	-17.61691819	1.22E-06	3.21E-05	5.688076023	Hsh2d
1369841_at	1.325921759	7.817209649	9.674779025	4.88E-05	0.000481455	1.48035496	Hspa2
1367577_at	1.013603627	13.17272549	24.89185632	1.39E-07	7.19E-06	8.142931233	Hspb1
1387898_at	1.482140457	8.603620797	9.253110533	6.37E-05	0.000591548	1.175417187	Hspb6
1372565_at	1.037281563	6.245687947	4.211427339	0.004925038	0.020116072	-3.743809525	Htra3
1373797_at	-1.335786002	8.649069173	-37.3535266	1.07E-08	1.30E-06	10.98019833	Hyal3
1375988_at	1.625878003	8.741562752	14.67931617	3.81E-06	7.34E-05	4.393835558	Hyls1
1387202_at	-1.612050431	11.07515103	-25.71575751	1.14E-07	6.24E-06	8.373206155	Icam1
1388872_at	1.536863675	10.12744882	17.87305766	1.12E-06	3.01E-05	5.790676321	Idi1
1376845_at	-5.166511948	13.29121701	-35.03980999	1.61E-08	1.66E-06	10.53944354	Ifi27l2b
1374551_at	-2.79957151	10.31803551	-28.62730533	5.77E-08	3.88E-06	9.129234829	Ifi35
1381014_at	-3.718756355	10.16613957	-38.92380265	8.25E-09	1.07E-06	11.26234109	Ifi44
1379748_at	-7.141355847	9.049084898	-35.61463402	1.45E-08	1.56E-06	10.65189104	Ifi44l
1394352_at	-5.647690955	5.95995498	-15.91703816	2.30E-06	5.01E-05	4.967464209	Ifih1
1379568_at	-7.843141924	11.02435518	-58.964236	5.91E-10	2.30E-07	14.00265918	Ifit2
1376908_at	-8.373995826	10.94781428	-44.15061727	3.71E-09	6.44E-07	12.11598695	Ifit3
1387995_a_at	-2.638975941	13.07441586	-21.78189027	3.23E-07	1.25E-05	7.196604058	Ifitm3
1375696_at	-1.835052816	3.693283912	-10.72274119	2.62E-05	0.000301835	2.190031889	Ifnar1
1390154_at	-1.599147688	7.836636391	-12.3889274	1.09E-05	0.000157187	3.198027058	Ifnar2
1375716_at	-1.633747803	7.449590236	-10.96703587	2.29E-05	0.000271762	2.346458091	Ifngr2
1367795_at	-1.016574935	10.490296	-18.78340387	8.19E-07	2.41E-05	6.143873957	Ifrd1
1370333_a_at	2.691795997	11.85340828	45.55390604	3.04E-09	5.79E-07	12.32540826	Igf1
1367571_a_at	1.129117524	7.730236081	12.29882993	1.13E-05	0.000162393	3.14682752	Igf2
1372168_s_at	1.194340843	5.863005899	7.835019054	0.000170231	0.001270461	0.05395969	Igfbp6
1387687_at	-2.568998638	10.3383156	-31.52739016	3.13E-08	2.60E-06	9.80528867	Igsf6
1396163_at	-6.290693489	6.317511825	-76.57489184	1.12E-10	9.29E-08	15.58007048	Igtp
1375796_at	-6.823372216	5.794263392	-58.17718294	6.43E-10	2.41E-07	13.91785688	Igtp /// Irgm2 /// LOC102555634
1389062_at	-1.309891925	12.33957814	-33.76940853	2.03E-08	1.93E-06	10.28356468	Ik
1387711_at	-7.355873395	5.787579191	-74.44260385	1.34E-10	1.00E-07	15.41695027	Il10
1385572_at	-1.421420489	8.493480564	-13.78810106	5.61E-06	9.82E-05	3.951153312	Il10ra
1388711_at	-2.060958444	10.70087357	-55.6168191	8.56E-10	2.99E-07	13.63157516	Il13ra1 /// LOC100360218
1368375_a_at	-3.444762733	5.900332004	-25.70786954	1.14E-07	6.24E-06	8.371038115	Il15
1369665_a_at	-2.754556434	11.71526678	-91.33861112	3.66E-11	5.16E-08	16.55073583	Il18
1369031_at	-4.440610734	8.886247647	-23.23038458	2.15E-07	9.52E-06	7.653544839	Il18bp
1371170_a_at	-9.82447032	8.010835168	-90.62880185	3.84E-11	5.16E-08	16.50964151	Il1a
1398256_at	-5.643821425	11.87492767	-42.63021501	4.63E-09	7.13E-07	11.88016071	Il1b
1392946_at	-1.103040591	8.965896179	-17.10220165	1.47E-06	3.62E-05	5.477363413	Il1r1
1387273_at	-1.344928798	8.197919523	-6.13735845	0.000685154	0.003862874	-1.528456127	Il1rl1
1387835_at	-6.041254945	5.241288567	-54.42331647	9.83E-10	3.12E-07	13.49240206	Il1rn
1389092_at	-1.366938115	2.959616313	-4.124427514	0.005449742	0.021826339	-3.856171886	Il2rg
1373970_at	-1.241634582	9.532873578	-15.70570031	2.50E-06	5.34E-05	4.872653209	Il33
1368134_a_at	-2.84584534	7.831940927	-14.91845158	3.45E-06	6.78E-05	4.508224191	Il4r
1369191_at	-7.413812433	7.976430513	-33.30722766	2.21E-08	2.02E-06	10.1878508	Il6
1371926_at	-1.060296655	11.41276017	-17.34904456	1.35E-06	3.41E-05	5.579184883	Il6st
1369208_at	-2.852582019	5.646983091	-17.17300632	1.43E-06	3.55E-05	5.506717417	Il7
1386052_at	-4.470972825	10.02588309	-30.48609324	3.87E-08	2.98E-06	9.570499383	Il7r
1384035_at	2.881433037	7.884095819	23.21581149	2.16E-07	9.52E-06	7.649094493	Ildr2
1387366_at	1.190646905	4.673724952	7.984782945	0.000152397	0.001166192	0.180086934	Ilf3
1383292_at	1.267361655	4.686314112	17.22014743	1.41E-06	3.51E-05	5.526194979	Incenp
1377163_at	1.498608496	5.816729008	11.59025805	1.63E-05	0.000212646	2.731550316	Inhbb
1399125_at	-1.902369428	9.352326787	-22.40823816	2.70E-07	1.10E-05	7.397892097	Inpp1
1388502_at	-1.666902324	10.84117232	-26.09679285	1.03E-07	5.84E-06	8.477117302	Inpp5b
1367894_at	1.340091039	9.891916269	19.1567519	7.24E-07	2.22E-05	6.283818126	Insig1
1393690_at	-1.180120123	7.409468853	-7.009034415	0.000324069	0.002115499	-0.678857923	Insig2
1372723_at	1.137654468	10.48299473	15.14859923	3.13E-06	6.32E-05	4.61665402	Ipo9
1373036_at	2.185285053	6.142580204	10.32115194	3.30E-05	0.000357441	1.925737752	Iqgap2
1383474_at	-3.534046474	7.588396562	-18.89541615	7.89E-07	2.35E-05	6.186149825	Irak2
1380336_at	-3.764283908	8.49771631	-30.95657488	3.52E-08	2.75E-06	9.677633197	Irak3
1368073_at	-2.718851089	9.811642977	-58.81530282	6.00E-10	2.30E-07	13.9867236	Irf1
1379563_at	-1.365064521	7.315026209	-13.93822694	5.25E-06	9.33E-05	4.027607451	Irf5
1383564_at	-4.439657486	12.54709214	-44.84309113	3.36E-09	6.04E-07	12.22028678	Irf7
1383448_at	-2.277136988	10.235626	-32.61469727	2.53E-08	2.21E-06	10.04169218	Irf9
1391489_at	-3.880590281	9.778647799	-17.37314344	1.33E-06	3.41E-05	5.589048869	Irgm
1376151_a_at	-3.695113968	11.48841874	-31.46501863	3.17E-08	2.62E-06	9.791461702	Irgm2
1369771_at	1.322913617	3.810954156	3.665502255	0.009474658	0.034640534	-4.466652251	Irs1
1382314_at	-5.141582182	12.77775462	-27.97952057	6.66E-08	4.34E-06	8.968260334	Isg15
1390507_at	-7.429562203	6.429958704	-99.50131731	2.12E-11	3.88E-08	16.98939214	Isg20
1397717_at	-2.015641256	7.226010414	-11.50961757	1.70E-05	0.000218781	2.682808521	Isoc2b
1371817_at	1.266129599	6.860276863	8.279229992	0.000123214	0.000994247	0.422465746	Isyna1
1394824_at	1.329542348	3.221463336	3.987247856	0.006407825	0.024972048	-4.035551201	Itga11
1383240_at	1.524827193	11.33671954	26.42875177	9.55E-08	5.53E-06	8.566361318	Itga6
1383398_at	2.319283269	5.500745825	12.84021692	8.71E-06	0.000133884	3.449345642	Itga8
1370526_at	1.256448777	7.304112869	10.41870828	3.12E-05	0.00034271	1.990782684	Itgae
1388046_at	-2.052277707	6.79123134	-9.942732435	4.14E-05	0.000425336	1.668106718	Itgam
1380077_at	-1.488676484	7.769458263	-7.930251052	0.000158631	0.001202475	0.134388394	Itgax
1398358_a_at	2.304944761	9.010925698	35.6723027	1.43E-08	1.55E-06	10.66306155	Itgb5
1383708_at	2.332002013	7.861874199	10.11981653	3.72E-05	0.00039224	1.789737439	Itgbl1
1368856_at	-1.90694635	9.123240631	-36.46874045	1.25E-08	1.42E-06	10.81532024	Jak2
1369583_at	-2.978501548	4.975731134	-39.63793199	7.35E-09	9.76E-07	11.38644765	Jdp2
1387788_at	-1.057421817	8.326285568	-5.606713157	0.001125087	0.005801541	-2.089209323	Junb
1374006_at	-3.341920266	9.176139037	-41.58239812	5.42E-09	8.03E-07	11.71191265	Kat3
1392641_at	1.164916357	5.468544516	4.016826656	0.00618643	0.024233755	-3.996645933	Katnbl1
1377367_at	1.107490603	2.939982026	3.937185811	0.006802802	0.026285402	-4.101681146	Kazald1
1378738_at	1.410830255	3.827151346	6.963052747	0.000336492	0.00218031	-0.721618636	Kcnab1
1379863_at	2.656131618	3.902699308	9.596876162	5.12E-05	0.000499803	1.424907636	Kcnd2
1376225_at	1.265453897	7.993782774	18.59162624	8.73E-07	2.52E-05	6.07090559	Kcnip3
1398290_at	-1.576181942	5.188631817	-7.940156461	0.000157478	0.001195945	0.14270846	Kcnk13
1370342_at	1.48779327	3.094748314	9.016029221	7.44E-05	0.000666146	0.998607788	Kcnk2
1387318_at	1.540473682	7.175413967	8.13109913	0.000137009	0.001074154	0.301440823	Kcnmb4
1386049_at	1.181391795	5.610585216	5.027951835	0.002009872	0.009382195	-2.742467557	Kctd4
1372870_at	1.026602654	9.609306571	9.26415556	6.33E-05	0.000588224	1.183558087	Kdelr3
1390891_at	2.332067857	8.353106373	17.89796744	1.11E-06	3.00E-05	5.800576467	Kif11
1392065_at	1.035300516	6.646428636	7.647080992	0.000196087	0.001424125	-0.107135478	Kif18a
1372903_at	1.698598403	7.623461189	11.08628056	2.14E-05	0.000259415	2.421664056	Kif18b
1373722_at	2.285892613	9.356228455	23.63564988	1.93E-07	8.87E-06	7.776168919	Kif20a
1380775_at	1.915225024	8.876252829	13.01083296	8.03E-06	0.00012605	3.542201953	Kif20b
1391063_at	2.233303878	9.268486261	15.84271997	2.37E-06	5.11E-05	4.93426391	Kif23
1376617_at	-1.613966534	6.402448598	-5.481097754	0.001271465	0.006407601	-2.227185114	Kif26b
1374912_at	1.880292595	7.448226724	11.69981082	1.54E-05	0.000203925	2.797268859	Kif2c
1376185_at	1.871636732	8.493100909	22.70012405	2.49E-07	1.04E-05	7.489740262	Kifc1
1368249_at	-1.443717835	7.911255119	-16.82894846	1.63E-06	3.87E-05	5.362945813	Klf15
1386041_a_at	2.74403946	3.681491395	17.12297526	1.46E-06	3.60E-05	5.485988068	Klf2
1387260_at	-1.20866114	8.441432552	-11.75577337	1.50E-05	0.000199418	2.830620603	Klf4
1368363_at	1.363636843	7.852554416	4.865101625	0.002385211	0.010868522	-2.934565692	Klf5
1395557_at	-1.430290782	8.528981797	-11.60814577	1.62E-05	0.000211705	2.742319865	Klf6
1377618_at	1.551445009	3.647825508	5.368572795	0.001421061	0.007026006	-2.352548504	Klf7
1395223_at	2.026439376	9.229698323	13.62862631	6.03E-06	0.000103855	3.869064004	Klhdc8b
1383883_at	4.629458734	5.734514191	24.83753188	1.41E-07	7.27E-06	8.127470704	Klhl30
1377153_a_at	2.583210613	3.976135564	7.744642967	0.000182144	0.001338807	-0.023110968	Klhl6
1392515_at	4.046234052	6.653682054	9.24412188	6.41E-05	0.000594638	1.168785726	Klra17 /// LOC100910679 /// LOC102546863 /// LOC497796 /// LOC502907 /// LOC690097 /// Ly49si1 /// Ly49si2 /// Ly49si3 /// RGD1561306
1370740_at	2.135992987	7.913418098	26.17343062	1.02E-07	5.76E-06	8.49782559	Klra5
1388282_s_at	4.039702263	4.718338879	42.36245148	4.82E-09	7.30E-07	11.83762189	Klra5 /// LOC100911234 /// Ly49i2 /// Ly49i4 /// Ly49s7
1369549_at	-2.445842975	5.34654605	-13.60273078	6.10E-06	0.000104516	3.855648108	Klrk1
1368915_at	-3.638101579	7.61230954	-18.45441447	9.14E-07	2.61E-05	6.018236879	Kmo
1387050_s_at	-3.749783607	4.850622725	-12.25354441	1.16E-05	0.000165283	3.120960778	Kng1 /// Kng1l1 /// Kng2
1390137_at	2.504853241	9.053926138	28.87902934	5.46E-08	3.74E-06	9.190749761	Knstrn
1377689_at	2.272916391	6.49002563	12.3674865	1.10E-05	0.000158457	3.185874497	Kntc1
1367683_at	1.170509991	12.02516546	45.517363	3.06E-09	5.79E-07	12.32005099	Kpna2 /// LOC100359600
1373254_at	1.043836388	7.575477862	3.846995395	0.007584146	0.028791427	-4.221709596	Krt10
1388433_at	2.538352269	7.107422493	12.11269745	1.25E-05	0.000174343	3.039936429	Krt19
1371530_at	-1.03348105	3.790841109	-4.018497435	0.006174179	0.02419491	-3.994452058	Krt8
1392928_at	1.443619745	3.978346379	3.575210162	0.010603845	0.038110364	-4.590157246	L3hypdh
1375818_at	-1.202681658	7.886837531	-6.599814177	0.000456167	0.00278877	-1.067246748	Lactb
1367880_at	1.026927711	10.02834925	10.91548527	2.35E-05	0.000278172	2.313714875	Lamb2
1370993_at	-1.736122631	6.438964951	-7.686823838	0.000190265	0.001388651	-0.07280284	Lamc1
1383658_at	1.422768556	10.32276107	12.11262473	1.25E-05	0.000174343	3.039894365	Laptm5
1387868_at	-2.581349543	4.726712005	-8.440096406	0.000110001	0.000907405	0.55186054	Lbp
1387011_at	-3.3320112	12.94356693	-42.52505042	4.70E-09	7.21E-07	11.86349032	Lcn2
1370090_at	-1.45820648	9.837957687	-17.58881824	1.24E-06	3.23E-05	5.676730449	Lcp2
1370605_s_at	-1.557107657	6.571386627	-8.668688918	9.39E-05	0.000801323	0.732198498	Lepr
1369805_at	1.68533346	8.048662849	24.38296324	1.59E-07	7.82E-06	7.996712175	Leprel4
1387946_at	-2.270995232	12.76884466	-32.49839004	2.59E-08	2.25E-06	10.01681514	Lgals3bp
1369716_s_at	-6.596547146	8.120045491	-104.9308539	1.51E-11	3.14E-08	17.24996186	Lgals5 /// Lgals9
1368960_at	-1.45050007	8.207199532	-17.23077453	1.40E-06	3.50E-05	5.530578578	Lgals8
1387027_a_at	-8.059562183	8.102642879	-17.3598818	1.34E-06	3.41E-05	5.583622379	Lgals9
1373151_at	1.429062471	11.87412719	35.9972112	1.35E-08	1.49E-06	10.72562605	Lhfp
1386191_a_at	-1.446422309	8.108788903	-17.35379642	1.34E-06	3.41E-05	5.581130951	Lhfpl2
1379195_s_at	1.114347141	8.218737493	17.72977848	1.17E-06	3.12E-05	5.733464615	Lig1
1368204_at	1.082621879	9.561143328	17.25942852	1.39E-06	3.48E-05	5.542384858	Lig1 /// LOC100911727
1370493_a_at	-4.112111615	6.019575433	-8.999022877	7.52E-05	0.000672434	0.985770898	Lilra3 /// Lilrb3l /// LOC100912456 /// LOC683463 /// LOC690948 /// LOC690955
1387568_at	-2.150060688	5.943688905	-11.47394509	1.74E-05	0.00022188	2.661146449	Lilrb3
1370682_at	-2.512936266	7.740348742	-17.92127479	1.10E-06	2.98E-05	5.809827379	Lilrb3l
1375917_at	1.635559155	12.00541738	29.32969588	4.95E-08	3.49E-06	9.299471931	Lilrb4
1377232_at	2.16794044	7.539265179	31.77910714	2.98E-08	2.50E-06	9.860792857	Limch1
1387090_a_at	-1.498113971	8.803590948	-11.17108766	2.04E-05	0.000250188	2.474702604	Limk2
1373071_at	-1.045430943	8.02220861	-7.79253544	0.000175716	0.001302957	0.017821497	Lin37
1370928_at	-1.016744073	12.93386821	-17.73458499	1.17E-06	3.12E-05	5.735391275	Litaf
1376632_at	1.531567202	6.051352361	9.420508033	5.72E-05	0.000543538	1.297901796	Lmcd1
1368054_at	1.290312254	8.704328343	19.03906331	7.52E-07	2.28E-05	6.240000576	Lmna
1373897_at	1.7740418	9.984126089	23.52879715	1.99E-07	9.04E-06	7.744048864	Lmnb1
1381190_at	3.129986059	4.867684992	24.18689565	1.67E-07	8.09E-06	7.939531997	Lmo7
1374237_at	1.234000186	5.847182826	5.976539647	0.000793558	0.004340284	-1.69471902	Lmod1
1389464_at	1.112772257	7.471922218	6.808587037	0.000382375	0.002423226	-0.866876008	Lnx1
1385954_at	2.216950052	7.193143558	11.24361122	1.96E-05	0.000242521	2.519767623	LOC100125362
1389408_at	1.563190614	12.417911	23.1980293	2.17E-07	9.53E-06	7.643660265	LOC100359539 /// Rrm2
1371646_at	-1.26282543	11.23635185	-14.92418069	3.44E-06	6.78E-05	4.510942917	LOC100360180
1389918_at	1.229218008	12.58526973	23.55806735	1.97E-07	8.98E-06	7.752862428	LOC100360205
1391296_at	-2.241713129	5.440313233	-13.81786074	5.54E-06	9.72E-05	3.96637183	LOC100360380
1397537_at	-1.864401355	6.796781337	-8.861387762	8.24E-05	0.000722748	0.881104443	LOC100360856 /// LOC100912852 /// LOC100912904 /// LOC102555682 /// LOC102557056 /// LOC102557419 /// LOC102557525 /// LOC363181 /// LOC501396 /// MGC116197
1389600_at	-2.209057855	8.087754684	-9.931360158	4.17E-05	0.000427854	1.660229934	LOC100360856 /// LOC100912904 /// LOC102555682 /// LOC102557419 /// LOC363306 /// LOC501396 /// LOC685796
1391960_at	1.795493281	3.418221909	6.491786387	0.000500636	0.002998703	-1.172802521	LOC100361039 /// LOC100362881 /// LOC100911408 /// LOC100912517 /// LOC100912790 /// LOC100912792 /// LOC302022 /// LOC365085 /// LOC367597 /// LOC501230 /// LOC687005
1371509_at	-1.050786654	11.87090889	-23.22482402	2.16E-07	9.52E-06	7.651847087	LOC100361475 /// LOC100911055 /// Tbrg1
1373961_at	-1.532641863	10.19740863	-20.83130701	4.28E-07	1.53E-05	6.879582122	LOC100361713 /// LOC100362724 /// MGC95208
1375706_at	2.113565274	7.51948195	8.916088066	7.95E-05	0.000702781	0.922868232	LOC100361913
1383811_at	1.878412921	4.189554407	7.283785463	0.000259884	0.001783597	-0.427813634	LOC100362814
1373599_at	1.756069055	8.827890281	16.59826289	1.77E-06	4.12E-05	5.264921683	LOC100363275
1369931_at	-1.334399088	12.54088173	-7.398703151	0.000237439	0.001663466	-0.325020769	LOC100364062 /// Pkm
1382546_at	-8.724766564	6.875340355	-87.74235942	4.72E-11	5.22E-08	16.33723008	LOC100364832 /// LOC102551046 /// LOC102557205 /// LOC102557219 /// Phf11 /// Phf11b /// Setdb2
1371078_at	-5.51769222	6.907198383	-23.09323042	2.24E-07	9.65E-06	7.611546631	LOC100364956 /// LOC683761 /// RT1-CE11 /// RT1-CE13 /// RT1-CE5 /// RT1-CE7 /// RT1-EC2 /// Rt1.aa
1398376_at	-1.580539382	6.436122663	-7.774751358	0.000178072	0.00131666	0.002645896	LOC100365921
1385571_at	-6.553916523	6.297456113	-81.52707993	7.53E-11	6.69E-08	15.93480473	LOC100366216
1379576_at	-1.393463859	5.655560225	-9.976697163	4.05E-05	0.000418484	1.691584147	LOC100909405
1388694_at	-5.158789458	11.56866509	-37.39559147	1.06E-08	1.30E-06	10.98792837	LOC100909797 /// RT1-T24-3
1396077_at	-1.29436439	8.690109161	-12.49130037	1.03E-05	0.000151343	3.255781536	LOC100909830
1392965_a_at	-1.481959684	4.413721314	-8.314202311	0.000120193	0.000974406	0.45077449	LOC100909873 /// LOC100910861 /// Smoc2
1384259_at	2.465772953	6.826579827	18.62005359	8.65E-07	2.51E-05	6.08176899	LOC100909901 /// Racgap1
1373403_at	-3.424966385	7.902597672	-28.85481273	5.49E-08	3.74E-06	9.184856622	LOC100910163 /// LOC684871
1370111_at	1.971807522	7.753168769	16.75816399	1.67E-06	3.94E-05	5.333008741	LOC100910229
1374924_at	2.988646782	5.224180422	8.921154032	7.92E-05	0.000700757	0.926724965	LOC100910237
1371447_at	-5.732582062	7.503808701	-28.36879989	6.11E-08	4.04E-06	9.065462998	LOC100910270 /// Plac8
1376668_at	-2.458813532	5.969275334	-18.88183503	7.92E-07	2.36E-05	6.181037362	LOC100910316 /// Ttc39a
1379477_at	-1.247156523	6.183978795	-6.636960893	0.000441927	0.002718794	-1.031248552	LOC100910424
1398589_at	-2.297408167	9.156371508	-41.9492475	5.13E-09	7.67E-07	11.77136644	LOC100910497 /// LOC100910669 /// LOC685020
1378176_at	1.268472562	6.10578057	8.577082687	0.000100017	0.000841569	0.66041927	LOC100910508
1397372_at	-2.037411686	4.366610298	-12.26472674	1.15E-05	0.000164532	3.127356324	LOC100910520 /// LOC680562 /// LOC690779 /// Mob1a
1376736_at	1.612423514	6.337174515	10.13047395	3.70E-05	0.000390153	1.796996837	LOC100910632
1390524_at	-1.130361769	7.601598738	-5.23890451	0.001618638	0.007816461	-2.499115627	LOC100910646 /// Rlim
1376688_a_at	-1.623189712	11.86848896	-23.87978538	1.81E-07	8.45E-06	7.848998653	LOC100910669
1391754_at	-4.724217194	7.38471065	-16.74513913	1.68E-06	3.95E-05	5.327486573	LOC100910735 /// Oas1i
1393000_at	1.242054906	9.227847343	17.02729358	1.51E-06	3.67E-05	5.446177625	LOC100910792
1384449_at	-1.372590688	9.302423944	-27.8977323	6.79E-08	4.39E-06	8.94765624	LOC100910797
1395301_x_at	-1.249368887	5.415612115	-4.033488895	0.006065455	0.023868098	-3.974784807	LOC100910801 /// LOC102547879 /// RGD1561143
1396117_at	1.362077308	6.830290735	5.781566933	0.000951993	0.005048775	-1.900545372	LOC100910839
1376749_at	3.278195998	9.124035302	23.31071975	2.11E-07	9.41E-06	7.678026313	LOC100910855 /// Ogn
1372604_at	-5.111852196	9.397904471	-27.29678224	7.79E-08	4.84E-06	8.794282988	LOC100910885
1376007_at	1.177379684	6.909247024	9.751003371	4.65E-05	0.000464547	1.534227927	LOC100910911 /// Tprkb
1377950_at	-2.551719345	12.86562717	-25.8109766	1.11E-07	6.13E-06	8.399322924	LOC100910934 /// RGD1309362
1374756_at	-1.432421581	4.992680877	-9.156012741	6.78E-05	0.000621185	1.103484107	LOC100910965 /// RGD1311188
1372585_at	-3.60731653	12.29836565	-82.17432316	7.17E-11	6.55E-08	15.9788335	LOC100910973
1378421_at	2.396465742	8.022566494	7.339000476	0.000248811	0.001721762	-0.378264819	LOC100910996
1377626_at	-5.212249692	7.359057675	-16.12360324	2.13E-06	4.69E-05	5.058955354	LOC100911030
1384195_at	-1.220217264	3.119418426	-4.955812425	0.002167273	0.009998487	-2.82710337	LOC100911041 /// Tmem45a
1394359_at	1.132163864	6.142881177	16.51363209	1.83E-06	4.19E-05	5.228624384	LOC100911069
1379223_x_at	-3.497454203	6.67247086	-27.6448098	7.19E-08	4.60E-06	8.883534331	LOC100911077
1388754_at	-1.634519361	13.27612886	-42.00590445	5.09E-09	7.64E-07	11.7804954	LOC100911177
1376296_at	1.546841395	4.033061302	9.834818826	4.42E-05	0.00044698	1.593038154	LOC100911217
1383578_at	1.529684289	9.496604899	13.31065809	6.98E-06	0.000114808	3.702628423	LOC100911267 /// Rad51
1372302_at	-1.649485715	8.790859505	-23.13964139	2.21E-07	9.62E-06	7.625786812	LOC100911313 /// Rmdn3
1384887_at	1.021655553	3.051262475	4.187253647	0.005064965	0.020568731	-3.774920865	LOC100911506
1377461_at	-1.936367801	4.833042883	-11.17573837	2.04E-05	0.000249948	2.477600506	LOC100911534
1376935_at	-1.058947837	7.106613225	-11.08022217	2.15E-05	0.000260077	2.417860955	LOC100911553
1371697_at	-1.105214525	8.78752111	-18.06786336	1.04E-06	2.88E-05	5.867737719	LOC100911615 /// Pnpla2
1375986_at	-2.632855656	7.049675213	-11.78878305	1.47E-05	0.000197225	2.850224443	LOC100911717
1383913_at	1.482872038	4.004116078	5.432675454	0.001333546	0.006667514	-2.280925887	LOC100911719
1372556_at	1.189725867	11.07013318	19.07891477	7.42E-07	2.26E-05	6.254868238	LOC100911840 /// Polr2l
1383688_at	2.189550822	5.493449882	12.08652483	1.26E-05	0.000175951	3.02478361	LOC100911864
1379232_at	1.095912429	7.565422469	8.013845191	0.00014919	0.001147008	0.204336543	LOC100911865 /// LOC100911914 /// LOC685933
1377049_at	1.233366573	8.860452112	19.08801668	7.40E-07	2.26E-05	6.258259595	LOC100911867 /// Pnpla7
1387130_at	-2.066683979	10.43957125	-15.44423958	2.78E-06	5.76E-05	4.753623222	LOC100911874 /// Slc40a1
1391302_at	-2.954272007	4.828628408	-10.35328575	3.24E-05	0.000352871	1.947223494	LOC100911946
1377736_at	1.71961895	6.431163105	15.01991895	3.30E-06	6.58E-05	4.556226552	LOC100912084
1376009_at	-1.03354382	5.12607718	-5.186780805	0.001706644	0.008170399	-2.558675294	LOC100912115
1389084_at	1.029188565	10.03207757	12.39374922	1.08E-05	0.000156958	3.200757327	LOC100912167
1384925_at	1.07656273	7.902042622	11.79643924	1.47E-05	0.000196937	2.854764047	LOC100912219
1389439_at	-1.164705981	7.614590334	-11.50894248	1.70E-05	0.000218781	2.682399143	LOC100912247
1386120_at	1.359757917	3.282047035	6.185137416	0.000656261	0.003727516	-1.479657655	LOC100912373
1368871_at	1.200569115	7.329700578	7.189359828	0.000280149	0.001890703	-0.51324133	LOC100912399 /// Map3k1
1397164_at	-1.103256767	7.656291	-6.023333073	0.000760129	0.004192102	-1.646018596	LOC100912446
1376708_at	-2.770798792	8.020865651	-15.18489682	3.09E-06	6.26E-05	4.633609356	LOC100912449
1368474_at	-3.831421109	12.48243964	-67.08361625	2.60E-10	1.49E-07	14.79953735	LOC100912479 /// Vcam1
1386346_at	-1.155468631	7.894445692	-10.83275909	2.46E-05	0.000288047	2.260874779	LOC100912615 /// Tmem19
1395426_at	-1.416685273	9.073443082	-13.38392055	6.74E-06	0.000112172	3.741308522	LOC100912618 /// LOC679539 /// Ube2v1
1383566_at	1.175413801	5.201649049	8.219062804	0.000128616	0.001026546	0.373527842	LOC100913073
1382017_at	1.928286183	7.834139811	11.64691295	1.58E-05	0.000208411	2.765607734	LOC102546483 /// LOC102550366
1383524_at	1.589037563	5.587485277	7.394759817	0.000238172	0.001667025	-0.328526946	LOC102546557
1390457_at	1.122824725	5.558091332	10.54393653	2.90E-05	0.000325185	2.073479105	LOC102546784
1397655_at	1.994826718	5.757598792	15.57805095	2.63E-06	5.55E-05	4.814783422	LOC102546864
1375859_a_at	1.038470506	7.145345547	5.86951206	0.000876471	0.004705227	-1.807119201	LOC102547059
1377403_at	1.217380959	5.764813338	5.22746547	0.001637505	0.007896535	-2.512154794	LOC102547199
1377458_at	1.429011772	5.026335907	5.314821756	0.00149946	0.007343575	-2.413029143	LOC102547257 /// Sorl1
1393994_at	-1.233697113	4.766629128	-7.027934919	0.000319115	0.002092306	-0.661344391	LOC102547607
1394922_at	1.794894263	5.592866695	6.363000972	0.000560229	0.003289756	-1.30035578	LOC102548026
1378117_at	-1.832777442	7.842833806	-22.05948682	2.98E-07	1.18E-05	7.286533493	LOC102548076 /// LOC102556098 /// LOC102556463
1397929_at	-1.413571421	6.515974288	-7.266806126	0.000263401	0.00180271	-0.443110306	LOC102548205
1383983_at	1.530648617	9.119795059	6.779990106	0.000391631	0.002469906	-0.894044364	LOC102548260
1389744_at	2.179986624	6.122958649	8.570424055	0.000100478	0.000843973	0.655176486	LOC102548740
1392637_at	-3.580793472	11.77894967	-52.41791767	1.25E-09	3.69E-07	13.24980228	LOC102549198
1373992_at	-3.172147486	13.16724056	-32.3606368	2.66E-08	2.26E-06	9.987225819	LOC102549198 /// MGC108823
1392046_at	1.192349615	4.087865411	6.674299597	0.000428122	0.002646988	-0.995216623	LOC102549303
1392080_at	5.021956923	8.708537655	44.94394386	3.31E-09	5.99E-07	12.23532013	LOC102549724 /// LOC102549828
1391730_at	1.408523312	6.113318574	17.6125378	1.22E-06	3.21E-05	5.686308584	LOC102550606
1396362_at	-3.693153705	5.23314488	-21.67669135	3.33E-07	1.28E-05	7.16221879	LOC102550729
1385073_at	1.422968835	7.852238482	8.823750518	8.45E-05	0.000736687	0.852239723	LOC102551114
1383753_at	1.620281219	5.97200704	6.115751609	0.000698692	0.003929939	-1.550613271	LOC102551211
1381758_at	1.207015288	7.026569196	6.859654998	0.00036646	0.002342557	-0.818575125	LOC102552118 /// Mtbp
1391047_at	1.139892174	7.653038393	7.807407166	0.000173773	0.001291322	0.030490228	LOC102553524
1371700_at	2.516913555	8.736356882	19.3976707	6.69E-07	2.10E-05	6.372682419	LOC102553715 /// Mfap4
1380079_at	-2.827543868	4.299647574	-5.605387897	0.001126529	0.005805583	-2.09065425	LOC102553883
1389419_at	-2.117781134	10.63368756	-19.62958111	6.21E-07	2.00E-05	6.457185274	LOC102553917
1393037_at	1.826080884	8.017600454	7.054179702	0.000312379	0.002055581	-0.637086084	LOC102554622
1389688_at	1.01634396	6.384827214	8.39462108	0.000113564	0.000929646	0.515493496	LOC102554639
1381199_at	-1.647529614	5.370009474	-4.268570264	0.004611055	0.019026032	-3.670603006	LOC102554657
1395056_at	1.321770869	4.582263304	8.784251129	8.68E-05	0.000752988	0.821833285	LOC102555472
1391520_at	3.512462141	4.726337728	17.00383078	1.53E-06	3.70E-05	5.43638179	LOC102555739
1377885_at	1.369568639	4.655909471	4.29929243	0.004451501	0.018485408	-3.631439856	LOC102556334
1374963_s_at	-2.038338998	4.086146364	-7.812463643	0.000173118	0.001288301	0.034793184	LOC102556459
1397457_at	-5.264324001	5.783698121	-24.0172217	1.75E-07	8.23E-06	7.889661304	LOC102557324
1397708_at	1.122044829	8.641929232	8.903899259	8.01E-05	0.000707061	0.913581142	LOC288978
1379687_at	-1.09317567	7.710209247	-3.979659199	0.00646603	0.025164193	-4.045552677	LOC301861
1381434_s_at	4.592768065	7.344299248	28.7713588	5.59E-08	3.79E-06	9.164507723	LOC302022
1378914_a_at	-2.14414131	7.598089188	-12.8241486	8.78E-06	0.000134608	3.440540802	LOC308990
1382956_at	1.370369419	3.449429202	5.888698429	0.000860912	0.00463677	-1.786865487	LOC361016
1381509_at	-1.043362997	6.737402505	-7.546052647	0.000211826	0.001516128	-0.19506467	LOC498369 /// Nbr1
1376920_at	-3.3007746	11.38300882	-67.40506006	2.52E-10	1.48E-07	14.82842119	LOC500013
1374225_at	1.266933	7.054551292	9.198237493	6.60E-05	0.000607678	1.13484652	LOC500700
1383662_at	-2.796451309	10.02162346	-87.33784898	4.86E-11	5.22E-08	16.31236728	LOC500956
1373831_at	-1.195311504	7.745388425	-18.77600797	8.21E-07	2.41E-05	6.141073737	LOC619574
1372719_at	-1.725099538	11.84073401	-30.99892462	3.49E-08	2.73E-06	9.687190814	LOC678893
1376699_at	1.59486707	4.93690697	9.419627803	5.73E-05	0.000543538	1.297262719	LOC679158
1390126_at	3.06192898	5.211585348	17.64035591	1.21E-06	3.18E-05	5.697525505	LOC679342
1376983_at	-1.898914282	6.32198017	-6.180018021	0.00065929	0.003742154	-1.484873331	LOC680200
1389196_at	1.1505011	9.34093085	13.60668424	6.09E-06	0.000104431	3.857697876	LOC681367
1396323_at	-1.235857713	8.108290299	-16.54150553	1.81E-06	4.17E-05	5.240599125	LOC681383
1373519_at	1.38376584	7.169119756	10.6077326	2.80E-05	0.000315807	2.115267825	LOC681943
1368080_at	2.948095188	9.251409281	24.36641906	1.59E-07	7.82E-06	7.991905704	LOC683573 /// Rgcc
1397669_at	-1.440557954	5.322214334	-7.294680618	0.000257655	0.001772747	-0.418013043	LOC683722
1383149_at	-3.293738968	6.786729715	-5.569274507	0.00116662	0.005973118	-2.130116345	LOC684122
1390312_at	-3.353721478	10.32467899	-36.85239025	1.17E-08	1.37E-06	10.88735339	LOC684193
1382950_at	-5.580926087	10.81033294	-72.94662344	1.53E-10	1.06E-07	15.29849633	LOC685067
1389440_at	1.502573585	8.486129518	13.42378535	6.62E-06	0.000110784	3.762271517	LOC686151
1393414_at	1.96559612	7.879016817	11.6053051	1.62E-05	0.000211705	2.740610627	LOC686461 /// Tmem64
1380486_at	1.002015068	7.456436886	7.322785112	0.000252006	0.001740449	-0.392785423	LOC687022
1388441_at	1.167294234	11.08374872	25.95002577	1.07E-07	5.99E-06	8.437281476	LOC689574
1384752_at	2.038613853	5.383245896	6.15361754	0.000675163	0.003814157	-1.511819652	LOC689770
1389365_at	-2.122716963	9.838869509	-43.13683507	4.30E-09	7.10E-07	11.95980901	LOC690000
1391855_at	1.113009508	6.271932712	5.291618246	0.001534802	0.00748249	-2.439257973	LOC690085
1398442_at	1.031123102	6.144006566	7.116215694	0.000297091	0.001979692	-0.580023771	LOC690422
1390823_at	1.312100614	8.202448003	18.51946157	8.95E-07	2.57E-05	6.043253638	LOC690646 /// Skp2
1386174_at	1.070510249	6.179917115	5.057920719	0.001948296	0.009133261	-2.707520973	LOC691422
1388598_at	1.885865895	5.682221403	20.0982346	5.36E-07	1.80E-05	6.624933696	LOC691995
1388902_at	1.97907889	9.762297488	21.74914468	3.26E-07	1.26E-05	7.185918998	Loxl1
1391450_at	1.245853301	10.10021169	10.70134904	2.65E-05	0.000304375	2.176180537	Loxl2
1385299_at	1.401502726	6.121170886	4.973718176	0.00212695	0.009853421	-2.806027879	Lpar4
1381193_at	1.038930819	7.348861221	10.17320182	3.60E-05	0.000382702	1.826032962	Lpgat1
1367996_a_at	1.692375605	4.26325114	5.681101159	0.001047431	0.005470952	-2.008467827	Lphn1
1386965_at	2.214298657	11.15135106	21.95570684	3.07E-07	1.20E-05	7.25304888	Lpl
1378633_at	-1.364833219	10.39215674	-25.60944051	1.17E-07	6.34E-06	8.343926076	Lpxn
1374652_at	-1.665278371	11.77906138	-18.79670892	8.15E-07	2.40E-05	6.148908721	Lrig1
1384069_at	-1.04780202	7.20158762	-16.48672118	1.85E-06	4.22E-05	5.217044344	Lrp11
1370932_at	1.206107394	11.21982492	21.51464949	3.49E-07	1.33E-05	7.108920365	Lrp4
1373167_at	1.055291475	6.373145966	6.036982915	0.000750681	0.004152513	-1.631862681	Lrrc20
1382941_at	1.603264235	6.067182761	9.877582389	4.31E-05	0.000438742	1.622873003	Lrrc32
1374020_at	-1.476210335	6.775821565	-14.53241837	4.05E-06	7.69E-05	4.322674638	Lrrc38
1385754_s_at	-1.803415993	8.302023006	-30.52831527	3.84E-08	2.96E-06	9.580186	Lrrc4
1384178_at	1.026559823	9.259526184	23.32463582	2.10E-07	9.39E-06	7.682258311	Lrrc4b
1394651_at	1.543430871	4.688139059	9.780546287	4.57E-05	0.000458234	1.555007958	Lrrc71
1392755_at	-1.348391666	8.12881376	-12.31217378	1.13E-05	0.000161643	3.154432465	Lrrc8c
1391601_at	1.898764688	8.467723464	36.52752832	1.23E-08	1.42E-06	10.82641259	Lrrn2
1368964_at	2.251266792	7.452986088	19.97968339	5.56E-07	1.85E-05	6.582874426	Lrrn3
1371712_at	1.334548144	9.008891723	21.46099731	3.55E-07	1.34E-05	7.091183259	Lsm2
1388673_at	-1.709075947	8.687193849	-9.901315663	4.24E-05	0.000433585	1.639381609	Lsp1
1367912_at	-1.059008664	8.738026864	-6.123975555	0.000693504	0.003904994	-1.542173295	Ltbp1
1371500_at	1.934681434	5.700013613	7.020057281	0.00032117	0.002101422	-0.668639499	Ltbp4
1388347_at	-4.926325879	10.3465672	-36.34142581	1.27E-08	1.45E-06	10.79122977	Ly6e
1376253_at	1.4901885	6.313991961	5.806158194	0.000930158	0.004949013	-1.874323747	Ly6h
1393280_at	-2.03941675	10.16443557	-60.66803852	4.93E-10	2.13E-07	14.18135761	Ly86
1372321_at	1.136803994	6.139961702	11.29617657	1.91E-05	0.000237589	2.552264784	Lyl1
1368679_a_at	-3.385518449	8.527582857	-24.14871074	1.69E-07	8.10E-06	7.928340229	Lyn
1398602_at	1.556337484	8.034876789	15.5034936	2.71E-06	5.65E-05	4.780769267	Mad2l1
1372409_at	-1.558818183	9.00187361	-18.0456057	1.05E-06	2.89E-05	5.858974833	Mad2l1bp
1380229_at	-1.872127177	7.390964325	-14.12589886	4.83E-06	8.75E-05	4.122083913	Maff
1368874_a_at	-1.168456398	6.642583345	-8.796228454	8.61E-05	0.000748174	0.831065708	Mafg
1368861_a_at	1.558280074	8.621202957	17.03738693	1.51E-06	3.66E-05	5.450387565	Mag
1381871_at	1.072179342	8.144343131	17.88589902	1.11E-06	3.00E-05	5.795781699	Magi1
1394346_at	-1.191567058	3.952321487	-3.336479823	0.014365849	0.049382507	-4.921673803	Man1a2
1398693_at	1.612911964	8.538020232	15.65805864	2.55E-06	5.42E-05	4.85110856	Man1c1
1388667_at	1.162150582	9.372451362	11.6809898	1.56E-05	0.000205505	2.786019037	Man2a1
1374110_at	1.135155708	6.901266782	10.24063099	3.46E-05	0.000371154	1.871634001	Man2a2
1388699_at	1.038254683	10.47481264	20.2988835	5.03E-07	1.73E-05	6.695553278	Man2b1
1371003_at	1.695036657	5.372416803	5.988477361	0.000784874	0.004303384	-1.682269415	Map1b
1388152_at	1.014410286	12.08917653	13.07268059	7.80E-06	0.000123662	3.5755786	Map2
1367760_at	-1.070266925	11.51306445	-29.49722585	4.77E-08	3.40E-06	9.339435672	Map2k1
1387809_at	1.274170389	3.248459522	5.317431113	0.001495543	0.00732901	-2.410084119	Map2k6
1369393_at	-3.796593672	7.755960837	-17.48447048	1.28E-06	3.33E-05	5.634441806	Map3k8
1372342_at	1.275577565	7.231006892	23.15437629	2.20E-07	9.61E-06	7.630301759	Marveld1
1390905_at	-1.754444889	7.280606813	-16.47168474	1.86E-06	4.24E-05	5.21056594	Mast4
1387646_a_at	-1.261440593	6.965667045	-11.18729575	2.03E-05	0.000248673	2.484797251	Max
1378601_at	1.490519776	7.000087749	8.433345857	0.000110522	0.000910802	0.546472509	Mboat2
1368810_a_at	1.13580937	13.23800517	16.6496545	1.74E-06	4.06E-05	5.286874553	Mbp
1396209_at	1.12629793	4.490084857	4.711857811	0.0028116	0.012478657	-3.118760643	Mcart1l
1370141_at	-1.486686273	10.00447041	-33.80167812	2.02E-08	1.93E-06	10.29019398	Mcl1
1374036_at	1.585697678	9.666099867	32.63133051	2.52E-08	2.21E-06	10.04524201	Mcm2
1372406_at	1.500579379	6.136599476	10.13193891	3.69E-05	0.000390129	1.797994174	Mcm3
1373557_at	1.082475712	11.09424165	16.18699938	2.07E-06	4.60E-05	5.086805143	Mcm4
1376055_at	2.150139666	8.425707206	17.27506132	1.38E-06	3.47E-05	5.548817883	Mcm5
1371074_a_at	2.115764658	10.16270064	35.97523741	1.36E-08	1.49E-06	10.7214145	Mcm6
1388744_at	1.341323302	10.80628314	22.31928444	2.77E-07	1.12E-05	7.369657584	Mcm7
1375382_at	2.149633851	7.285898256	11.36437432	1.84E-05	0.000231454	2.594220166	Mdc1
1381821_at	1.492918457	8.018226145	12.93527115	8.32E-06	0.000129413	3.501220538	Mdga2
1384427_at	-1.896744638	10.23586586	-161.5627741	9.72E-13	3.78E-09	19.00031472	Mdm2
1389572_at	1.867420572	4.889776553	5.346777091	0.00145228	0.007154066	-2.377026224	Me3
1376645_at	1.363033477	6.851868166	11.06399858	2.17E-05	0.000262101	2.407667373	Medag
1372332_at	1.259581396	8.804235166	10.13053041	3.70E-05	0.000390153	1.797035277	Mef2c
1380637_at	1.161578496	5.036832156	7.125444363	0.00029489	0.001969247	-0.571568213	Megf11
1387439_at	3.011112141	5.083548262	6.143528956	0.000681343	0.003844173	-1.522138692	Megf6
1389756_at	1.93343557	7.954143058	12.69243045	9.35E-06	0.000140923	3.367970445	Melk
1390389_at	-2.147630344	9.840257818	-28.72122909	5.65E-08	3.82E-06	9.152254266	Mertk
1371731_at	2.348900837	7.576554547	10.49114303	2.99E-05	0.000332115	2.03872458	Mest
1380565_at	1.035992733	6.050796172	7.996097483	0.000151139	0.001158274	0.189536456	Mettl18
1373674_at	3.165713799	4.523698781	15.16045117	3.12E-06	6.30E-05	4.62219462	Mfap5
1386860_at	1.125131961	7.365764557	6.414749117	0.000535363	0.003167067	-1.2488762	Mfge8
1383457_at	2.169737289	7.093077694	15.43683412	2.79E-06	5.77E-05	4.750223457	Mfsd4
1392547_at	-5.238027848	7.153953926	-21.27149527	3.75E-07	1.40E-05	7.028172511	MGC105649
1373333_at	1.504565713	10.43606648	20.16966618	5.24E-07	1.78E-05	6.650155572	MGC109340
1370129_at	-1.193661961	5.780013392	-6.074300412	0.000725523	0.004043555	-1.593276753	Mgea5
1370831_at	-1.054905645	9.430119162	-6.619988426	0.00044837	0.002752821	-1.047677444	Mgll
1368311_at	-1.796780947	9.962973565	-20.8686955	4.23E-07	1.53E-05	6.892326032	Mgmt
1367612_at	-1.887850362	12.15121703	-35.13576066	1.58E-08	1.65E-06	10.55835423	Mgst1
1388300_at	1.903150124	8.964153425	13.64236591	5.99E-06	0.000103268	3.87617234	Mgst3
1383952_at	1.807207502	6.31898642	9.85649815	4.36E-05	0.000443114	1.608177503	Mical1
1379059_at	-2.281116934	6.038420038	-6.538697487	0.000480746	0.002904179	-1.126805306	Micall2
1368610_at	-2.818382844	9.020452392	-26.69873811	8.96E-08	5.37E-06	8.638083804	Milr1
1395944_at	1.727906739	9.115158129	18.59155728	8.73E-07	2.52E-05	6.070879215	Mis18a
1393085_at	-2.80218055	9.779371386	-54.44609161	9.80E-10	3.12E-07	13.49509337	Mitd1
1374775_at	1.903784326	10.94069266	31.18303582	3.36E-08	2.71E-06	9.728579043	Mki67
1379325_at	-1.610285351	7.30040831	-6.435396232	0.000525794	0.003123531	-1.228421453	Mkrn1
1377659_at	2.192390345	6.177150603	11.55011342	1.67E-05	0.000215619	2.707324766	Mlf1
1367858_at	1.475146207	7.217316275	10.63890839	2.75E-05	0.000311645	2.135606559	Mmp11
1388204_at	-6.92736931	5.576101476	-64.73396237	3.26E-10	1.72E-07	14.58259241	Mmp13
1383668_at	1.545389789	8.957793115	20.42354082	4.84E-07	1.68E-05	6.73907363	Mmp15
1368657_at	-6.175177863	5.200251375	-125.7618142	4.79E-12	1.24E-08	18.06602528	Mmp3
1398275_at	-3.839113604	8.990798418	-59.40905607	5.63E-10	2.30E-07	14.04994844	Mmp9
1380243_at	1.696518219	6.784866886	17.07908627	1.48E-06	3.63E-05	5.46775437	Mms22l
1391626_at	1.411266768	5.528057906	7.604736672	0.000202515	0.001462614	-0.143874706	Mnd1
1385702_at	-6.452946429	7.445029587	-24.92511199	1.38E-07	7.18E-06	8.152378412	Mnda
1370434_a_at	1.697746993	4.802950592	3.43972309	0.012584816	0.044228183	-4.777446657	Mobp
1372683_at	-1.139435998	4.613753546	-10.77783613	2.54E-05	0.000295373	2.22559071	Mocos
1372177_at	-1.075617385	11.87146026	-21.88715628	3.13E-07	1.22E-05	7.230842456	Mocs2
1390142_at	-1.312239457	10.67478251	-24.07725538	1.72E-07	8.20E-06	7.907347911	Morc3
1390915_at	1.45077208	6.455564728	11.1735008	2.04E-05	0.000250121	2.476206391	Morc4
1374725_at	-4.968417713	6.254379696	-23.46064429	2.03E-07	9.15E-06	7.72348354	Mov10
1369427_at	-2.049039633	5.70703209	-6.915454099	0.000349926	0.002254476	-0.766113478	Mpeg1
1383324_at	1.918926891	7.638881913	22.76573306	2.45E-07	1.03E-05	7.510219171	Mpp6
1387368_at	-1.73449355	6.15706627	-8.857075648	8.27E-05	0.000724433	0.877802735	Mras
1392648_at	2.243105338	9.749431943	23.52428595	1.99E-07	9.04E-06	7.74268949	Mrc1
1379376_at	1.212227401	8.038841189	7.653125269	0.000195188	0.0014192	-0.101904706	Mreg
1383914_at	3.023296261	5.341410139	11.76967582	1.49E-05	0.000198461	2.83888321	Mrvi1
1376390_at	-3.571306843	9.018225324	-23.36714928	2.08E-07	9.29E-06	7.695170965	Ms4a6a
1378193_at	-3.75887522	11.42452833	-55.17883193	9.00E-10	3.04E-07	13.58093911	Ms4a7
1368002_at	1.22313225	8.416630449	22.60671428	2.56E-07	1.06E-05	7.460478965	Msh2
1368948_at	-1.536142964	6.405227204	-6.532060275	0.000483504	0.002917068	-1.133298279	Msn
1383193_at	1.841218855	8.070937379	17.90923952	1.10E-06	2.99E-05	5.805051956	Msrb3
1372808_at	-1.892617146	7.947844053	-21.35955102	3.65E-07	1.37E-05	7.057522246	Mthfd2 /// RGD1564040
1372911_at	1.376171423	8.261929806	19.56779489	6.34E-07	2.02E-05	6.434770044	Mthfr
1395344_at	1.600408542	5.957762794	11.23784482	1.97E-05	0.000243184	2.516194228	Mtmr1
1395041_at	2.265146146	5.153110599	6.684682692	0.000424371	0.002632131	-0.985223918	Mttp
1391563_at	1.938971984	6.654948566	12.0207099	1.31E-05	0.000180879	2.986544317	Mum1l1
1373032_at	3.022753466	5.071199024	16.53429915	1.82E-06	4.18E-05	5.237505079	Mustn1
1367925_at	-1.671689993	10.22462675	-20.70450019	4.44E-07	1.58E-05	6.836186892	Mvp
1371015_at	-6.924596958	12.18700007	-33.55242253	2.11E-08	1.97E-06	10.23880781	Mx1
1387283_at	-5.002638534	12.37330247	-53.80172984	1.06E-09	3.29E-07	13.41840506	Mx2
1376077_at	-2.824503755	5.708606771	-15.43737439	2.79E-06	5.77E-05	4.75047154	Mxd1
1374085_at	1.367508485	8.501947954	12.85948316	8.63E-06	0.000133049	3.459889159	Mxd4
1368963_at	-1.225125599	7.076386159	-5.943786916	0.000817948	0.004449424	-1.728965877	Mxi1
1390547_at	2.372726646	6.305187453	12.81600946	8.81E-06	0.000134991	3.436076892	Mxra7
1389236_at	-1.042749076	2.828343483	-4.681847648	0.002904753	0.0128262	-3.155224895	Mybphl
1379829_at	1.022654743	9.160158528	9.401927119	5.79E-05	0.000548379	1.284400323	Mycbp
1395781_at	1.702321906	6.308690581	9.037742943	7.33E-05	0.000658757	1.01496762	Mycl
1376648_at	1.715397971	4.86426055	5.755893318	0.00097541	0.005153629	-1.928002552	Mycn
1370158_at	1.925081631	11.53276709	32.3772467	2.65E-08	2.26E-06	9.990800846	Myh10
1370896_a_at	2.098750722	4.548858204	11.88959053	1.40E-05	0.000189602	2.909779036	Myh11
1371293_at	-1.024093584	2.678252076	-8.549466821	0.000101944	0.000853849	0.6386529	Myl4
1388298_at	3.027990982	10.86043937	40.77594931	6.14E-09	8.70E-07	11.57907735	Myl9
1370478_at	1.096114082	6.912698286	9.776705051	4.58E-05	0.000459022	1.552309233	Myo16
1388917_at	1.671572262	7.226031586	17.85356585	1.12E-06	3.03E-05	5.782919952	Myo1d
1384298_at	1.894491079	9.448173516	28.97600309	5.34E-08	3.68E-06	9.214295972	Myo1f
1398430_at	1.390567426	7.806822825	12.35871965	1.10E-05	0.000158968	3.180899834	Myo6
1380245_at	2.062691704	7.768764571	11.66964037	1.57E-05	0.000206379	2.779227088	Myo7a
1390859_at	-2.587628788	5.10179032	-32.19491652	2.74E-08	2.31E-06	9.951447845	N4bp1
1393757_at	-1.127107499	7.417157166	-12.04979502	1.29E-05	0.000178783	3.003467079	N4bp2l1
1392579_at	-1.819669719	9.611769494	-26.50713113	9.38E-08	5.51E-06	8.58726174	Nabp1
1392893_a_at	1.081714128	10.86801255	12.78113623	8.96E-06	0.000136742	3.416920432	Nacc2
1370555_at	1.141539075	8.423321995	11.22682298	1.98E-05	0.000244351	2.509359397	Nalcn
1389014_at	-2.641983041	10.72042859	-31.59209317	3.09E-08	2.57E-06	9.819601366	Nampt
1378264_at	1.357718393	9.682317065	14.39837811	4.29E-06	8.03E-05	4.257136117	Nasp
1387187_a_at	-1.225235857	8.18160926	-11.01951588	2.22E-05	0.000266137	2.379647935	Nat1
1369747_at	-1.377233903	5.888917246	-6.552809217	0.000474939	0.002874128	-1.113016552	Nat2
1374799_at	1.757438576	9.346062048	17.43120871	1.31E-06	3.36E-05	5.612760363	Ncapd2
1391604_at	1.09408657	8.624633548	16.61638055	1.76E-06	4.10E-05	5.272668576	Ncapd3
1378296_at	2.002272962	8.120236807	11.17164781	2.04E-05	0.000250188	2.475051695	Ncaph
1374265_at	-2.046421941	10.49584612	-19.26699499	6.98E-07	2.16E-05	6.324619978	Nceh1
1387413_at	-1.11300472	5.917981411	-6.379881836	0.000551976	0.003250501	-1.283528865	Ncf1
1391737_at	-3.314113642	9.043241403	-54.96458808	9.23E-10	3.07E-07	13.55598674	Ncf4
1395081_at	-1.443713102	7.103764874	-8.692242869	9.24E-05	0.00079071	0.750550227	Ncoa7
1384565_at	1.029392866	10.00385011	10.06363557	3.85E-05	0.000403414	1.751356142	Ndc1
1371360_at	-1.799598651	10.04501506	-17.47703254	1.29E-06	3.33E-05	5.631417942	Ndrg1
1393274_at	1.165206703	5.692541225	9.304490193	6.16E-05	0.000575148	1.213215744	Ndufaf7
1368566_a_at	1.144213136	10.20733506	34.15448055	1.89E-08	1.85E-06	10.36222363	Ndufv3
1394904_at	-1.627059763	4.826597303	-3.985343244	0.006422378	0.025016226	-4.038060618	Necap1
1370016_at	2.695054867	5.405196035	16.56065337	1.80E-06	4.15E-05	5.248813797	Nell2
1392770_at	1.170048339	8.659849402	12.66825125	9.46E-06	0.000142199	3.354572029	Neo1
1386948_at	1.460439693	9.001998971	16.42064415	1.90E-06	4.30E-05	5.188531966	Nes
1385492_at	1.089261561	4.842141963	3.330817165	0.014471184	0.049678701	-4.929620518	Neto1
1393729_at	1.862409034	6.071055691	14.64844959	3.86E-06	7.41E-05	4.378940077	Neto2
1383906_at	-4.814863066	5.970865416	-52.80273872	1.19E-09	3.56E-07	13.29723453	Neurl3
1370697_a_at	2.807834521	7.479119712	24.60655545	1.50E-07	7.57E-06	8.061341978	Nexn
1390068_at	-1.988535508	6.448100613	-8.077342475	0.000142446	0.001105826	0.257067038	Nfe2l1
1368488_at	-2.582114801	7.507754407	-7.740897189	0.000182658	0.001341317	-0.026321074	Nfil3
1370968_at	-1.205865549	9.976544665	-23.3975049	2.06E-07	9.24E-06	7.704376138	Nfkb1
1375989_a_at	-1.316124466	8.510119433	-31.35990866	3.24E-08	2.65E-06	9.768093206	Nfkb2
1389538_at	-2.693090742	11.89620329	-48.0143776	2.18E-09	4.89E-07	12.6748835	Nfkbia
1367943_at	-1.194847722	7.761271553	-9.788036299	4.55E-05	0.000456502	1.560267497	Nfkbib
1378032_at	-3.115341667	10.58089561	-30.90391218	3.56E-08	2.77E-06	9.665728503	Nfkbiz
1377014_at	1.574825837	9.174783914	12.49477419	1.03E-05	0.000151227	3.257733537	Nim1k
1370348_at	-1.947824508	11.72814344	-17.80245405	1.15E-06	3.06E-05	5.762541138	Ninj1
1390037_at	4.608180062	5.350324994	38.49073392	8.85E-09	1.12E-06	11.18582213	Nkain4
1392686_at	1.488091107	5.570574292	9.567456331	5.22E-05	0.000507185	1.403865013	Nkd2
1393957_at	-5.397416705	5.482011806	-36.53637989	1.23E-08	1.42E-06	10.82808102	Nlrc5
1368863_at	1.063521664	7.607154149	9.388517437	5.84E-05	0.000552387	1.27464193	Nme3
1381875_at	-3.071144017	9.780266635	-42.66965885	4.60E-09	7.13E-07	11.88640101	Nmi
1383711_at	-1.128284825	9.290669876	-8.290734695	0.000122211	0.000987947	0.431789392	Nmt1
1372236_at	-1.689203377	7.794900964	-27.34415797	7.71E-08	4.82E-06	8.806502664	Nod1
1385752_at	1.160601018	9.067281046	7.414064086	0.00023461	0.00164773	-0.311376926	Npas3
1374767_at	-1.355634967	8.17534088	-10.68122402	2.68E-05	0.000306731	2.163126738	Npepo
1382874_at	1.111001974	11.03511754	9.34600698	6.00E-05	0.000564161	1.243625862	Npl
1367564_at	3.066709157	5.646758047	14.83929424	3.56E-06	6.97E-05	4.470556899	Nppa
1370517_at	-1.696001924	6.738531492	-14.50702928	4.10E-06	7.76E-05	4.310305448	Nptx1
1387599_a_at	-2.381242007	12.52370384	-37.84117036	9.86E-09	1.22E-06	11.06921844	Nqo1
1387365_at	-2.708438719	8.728942598	-38.24135431	9.22E-09	1.16E-06	11.14131872	Nr1h3
1370063_at	1.284019194	8.252330871	8.936001957	7.84E-05	0.000695046	0.938017892	Nr2f2
1379982_at	-1.37163391	8.988648391	-10.69802738	2.66E-05	0.000304603	2.174027521	Nrip1
1390469_at	1.373909756	2.828651391	6.885605044	0.000358663	0.002301227	-0.794136596	Nrm
1370570_at	1.319524539	7.587585917	13.00267782	8.06E-06	0.000126346	3.537789784	Nrp1
1388340_at	1.566379912	11.52678208	18.41236152	9.28E-07	2.64E-05	6.002016782	Ns5atp9
1392604_at	1.408180132	8.28629441	25.04753585	1.34E-07	6.99E-06	8.187043885	Nsdhl
1387817_at	1.269500269	9.528952968	15.16760923	3.11E-06	6.29E-05	4.625538872	Nsg1
1372118_at	1.058782393	6.398861069	14.66179643	3.84E-06	7.38E-05	4.38538465	Nsg2
1371849_at	2.416774129	8.706924777	24.45120429	1.56E-07	7.78E-06	8.0165022	Nt5dc2
1369200_at	1.439878857	7.143162707	8.629965308	9.64E-05	0.000819037	0.701935121	Nt5e
1368688_at	1.398161505	3.46548982	11.39269948	1.81E-05	0.000228798	2.611577951	Ntsr2
1391459_at	1.245319376	8.941248987	24.15310422	1.69E-07	8.10E-06	7.929628861	Nudt11
1373840_at	-1.095614936	9.821539636	-29.5981319	4.67E-08	3.35E-06	9.363389976	Nudt9
1383940_at	1.83991773	9.60117261	22.92990947	2.34E-07	9.96E-06	7.561200701	Nuf2
1387151_at	1.04951758	7.70578852	6.899798975	0.000354478	0.002278136	-0.78079932	Nup107
1390650_at	1.320827415	7.777648568	17.80982	1.14E-06	3.06E-05	5.76548159	Nup85
1384280_at	1.443784794	10.20649286	20.03981558	5.46E-07	1.82E-05	6.604239258	Nusap1
1386697_at	1.266471277	7.781488456	16.41949237	1.90E-06	4.30E-05	5.188033971	Nxph1
1371152_a_at	-6.203966653	10.45077917	-48.29797973	2.10E-09	4.87E-07	12.71379428	Oas1a
1388056_at	-5.747058992	8.573172541	-22.22079249	2.85E-07	1.14E-05	7.33826118	Oas1b
1377497_at	-7.350277692	10.15901328	-33.52407317	2.12E-08	1.98E-06	10.23293697	Oasl
1378753_at	1.737762117	7.766480785	13.50813121	6.37E-06	0.000108072	3.806430925	Ocln
1386986_at	-1.936526195	10.4447407	-23.18229043	2.18E-07	9.55E-06	7.6388469	Ogfr
1383453_at	2.670398615	5.873445351	16.52062632	1.83E-06	4.19E-05	5.231631043	Olfml1
1382072_at	2.840275048	6.421568512	27.26841934	7.84E-08	4.86E-06	8.786956633	Olfml2a
1387200_at	1.696684172	11.97069214	24.56896507	1.51E-07	7.63E-06	8.05051901	Olig1
1368683_at	-4.189860137	5.795116474	-20.10093287	5.35E-07	1.80E-05	6.625888073	Olr1
1380360_at	-2.076178567	9.245134486	-28.45106629	6.00E-08	3.99E-06	9.085824198	Oma1
1387197_at	4.325667312	4.97021299	23.18500501	2.18E-07	9.55E-06	7.63967733	Omd
1378796_at	1.229791628	9.675901592	11.14892102	2.07E-05	0.000252464	2.460875163	Omg
1387961_at	1.143348237	9.881332878	16.71640953	1.70E-06	3.99E-05	5.315291114	Opcml
1385857_at	-1.229139023	4.913484574	-4.273236683	0.004586415	0.018945837	-3.664645671	Ophn1
1368091_at	2.783478013	8.278224696	36.24249299	1.30E-08	1.46E-06	10.77244496	Oplah
1393373_at	-1.411118075	8.774456943	-19.10309107	7.37E-07	2.25E-05	6.263872732	Opn3
1377955_at	-1.109283232	7.854330485	-7.656143177	0.000194742	0.001416671	-0.099294232	Orai2
1385522_at	1.370010038	3.623318153	6.976148297	0.0003329	0.002163152	-0.709418213	Orc1
1376316_at	1.139912977	7.868761199	6.427029171	0.000529649	0.003141026	-1.236704723	Orc6
1368731_at	-2.598733651	3.411205998	-6.573312448	0.000466645	0.002840515	-1.093022008	Orm1
1390923_a_at	1.203238168	8.200315771	13.6245596	6.04E-06	0.000103989	3.866958736	Osbpl1a
1370336_at	-1.551369843	4.518549198	-16.96926461	1.55E-06	3.71E-05	5.421925976	Osgin1
1385310_at	-3.808200895	6.566985057	-18.96020547	7.72E-07	2.32E-05	6.210488637	Osm
1371421_at	1.018248349	11.51167671	48.12512802	2.15E-09	4.89E-07	12.69011127	Oxct1
1369743_a_at	-1.020303007	9.52250982	-11.33199522	1.87E-05	0.000234191	2.57432938	P2rx4
1380822_at	1.954674267	8.750377347	28.32265045	6.17E-08	4.07E-06	9.054013476	P2ry12
1370449_at	-3.909979316	4.176943183	-23.04222846	2.27E-07	9.73E-06	7.595863897	P2ry14
1368940_at	-2.716360163	7.001537768	-13.57334938	6.18E-06	0.000105734	3.840396815	P2ry2
1368754_at	-1.966919829	10.73983733	-39.54570658	7.46E-09	9.83E-07	11.37056274	P2ry6
1389093_at	1.331549742	9.494883493	15.07826664	3.22E-06	6.45E-05	4.583688063	Pak1
1374287_at	1.540010216	5.944292809	19.95066863	5.61E-07	1.86E-05	6.572542394	Pald1
1367687_a_at	1.063124437	11.63524818	16.95751289	1.55E-06	3.72E-05	5.417004727	Pam
1382924_at	1.537694914	5.751886665	8.671345713	9.37E-05	0.000800309	0.734270625	Pank1
1370962_at	-2.70066921	8.011184281	-15.14583704	3.14E-06	6.32E-05	4.615362136	Parm1
1376056_at	-2.818307357	7.454431302	-35.69294649	1.43E-08	1.55E-06	10.66705544	Parp10
1376002_at	-2.305885212	8.592079985	-18.33888811	9.51E-07	2.69E-05	5.973588942	Parp11
1380071_at	-2.978287428	11.3569863	-91.78029035	3.55E-11	5.16E-08	16.57605488	Parp12
1379613_at	-4.486636247	7.067908892	-29.52410985	4.75E-08	3.39E-06	9.345826244	Parp14
1376144_at	-2.824426931	11.067377	-46.92899034	2.52E-09	5.33E-07	12.5233968	Parp9
1388010_at	1.790802204	5.926441884	8.158114624	0.000134366	0.001059498	0.323649037	Parpbp
1372205_at	1.019450389	9.249460636	8.514114644	0.000104472	0.000869869	0.610701847	Patz1
1397341_at	1.34749317	10.23481415	15.84319299	2.37E-06	5.11E-05	4.9344757	Pbk
1372485_at	1.276745946	4.925778551	4.175318131	0.005135678	0.020790736	-3.790312895	Pcbd1
1370187_at	1.228143004	9.008057199	7.906176488	0.000161476	0.00122035	0.114131251	Pccb
1384824_at	1.983169566	7.198659051	8.193915162	0.000130954	0.001040238	0.352984968	Pcdh18
1385229_at	1.325120127	6.855261965	9.210154899	6.55E-05	0.000604251	1.143675558	Pcdh20
1390821_at	1.120101702	8.255098945	10.88124438	2.40E-05	0.000281819	2.291888338	Pcdha1 /// Pcdha10 /// Pcdha11 /// Pcdha12 /// Pcdha13 /// Pcdha2 /// Pcdha3 /// Pcdha4 /// Pcdha5 /// Pcdha6 /// Pcdha7 /// Pcdha8 /// Pcdha9 /// Pcdhac1 /// Pcdhac2
1385274_at	1.078102785	8.310753126	9.847140158	4.39E-05	0.000444355	1.601646148	Pcdhb19
1374355_at	-1.421675166	6.373889109	-11.67119283	1.56E-05	0.000206299	2.780156503	Pced1b
1377042_at	-1.080242758	10.08633986	-10.39602545	3.16E-05	0.000346245	1.975708075	Pcgf5
1368145_at	1.140521698	5.624451503	4.158714431	0.005235879	0.021116663	-3.811759193	Pcp4
1390227_at	5.632185119	6.926390741	33.32697224	2.20E-08	2.02E-06	10.19196929	Pcp4l1
1387058_at	-1.375871801	5.842672251	-13.27367268	7.10E-06	0.000115937	3.683024682	Pctp
1384203_at	1.043069814	6.084008063	6.681378792	0.00042556	0.002637205	-0.988402325	Pde1b
1369044_a_at	-3.081187781	7.412437455	-42.80244938	4.51E-09	7.13E-07	11.90736062	Pde4b
1371933_at	-1.279105813	7.463519989	-8.05784182	0.000144479	0.001118125	0.240909572	Pde4dip
1374452_at	-1.404736662	7.026727133	-20.94741953	4.13E-07	1.50E-05	6.919083824	Pde9a
1370642_s_at	1.431837721	7.482166104	8.76339497	8.81E-05	0.000760505	0.805731115	Pdgfrb
1390203_at	1.587493301	7.254806505	20.66252987	4.50E-07	1.59E-05	6.821764794	Pdk1
1375367_at	1.05292099	8.253793973	6.063004183	0.000733036	0.004078849	-1.604939189	Pdlim2
1370347_at	1.029191895	8.371356685	13.4525127	6.54E-06	0.000109923	3.777341274	Pdlim7
1372941_at	-1.291976444	8.756945279	-32.77395073	2.45E-08	2.17E-06	10.07559933	Pdrg1
1384591_at	1.278699759	4.191062196	3.677534204	0.009334436	0.034224836	-4.450275823	Pear1
1367949_at	-1.061240039	11.88724872	-19.75225232	5.97E-07	1.95E-05	6.501479635	Penk
1390391_at	-1.171877358	12.01589009	-31.0947579	3.42E-08	2.71E-06	9.70876704	Pfkfb3
1368919_at	-3.216381635	6.884620782	-14.5508188	4.02E-06	7.64E-05	4.33162608	Pgf
1387361_s_at	-1.174819224	13.78795967	-26.73047687	8.89E-08	5.35E-06	8.646465319	Pgk1
1377325_a_at	2.215620293	5.102365598	5.900129974	0.00085179	0.004598926	-1.774819732	Pgm2l1
1369719_at	-4.582739942	4.401012465	-36.78946002	1.18E-08	1.37E-06	10.87559508	Phex
1374354_at	1.270404575	5.456717113	10.74090742	2.59E-05	0.000300061	2.201774817	Phf19
1391998_at	1.580452545	3.416297871	6.785234534	0.000389915	0.002462623	-0.889055395	Phf20l1
1375224_at	-1.547249289	10.769243	-16.09964024	2.14E-06	4.72E-05	5.048400593	Phlda3
1378094_at	2.713102449	6.83778831	14.70211943	3.77E-06	7.29E-05	4.404820508	Phldb2
1371974_at	-1.331729354	8.827479589	-13.10279391	7.69E-06	0.000122476	3.591775595	Phyhd1
1372640_at	1.562342315	7.986357352	11.85024275	1.43E-05	0.000192444	2.886589198	Pi16
1369452_a_at	-1.938011967	8.102054891	-8.486829663	0.000106472	0.000884394	0.589061907	Picalm
1382724_at	-1.452861045	6.294755409	-11.05637756	2.18E-05	0.000263008	2.402874238	Pigo
1376795_at	-2.403125066	10.33291714	-48.41888171	2.06E-09	4.87E-07	12.73029934	Pik3ap1
1381572_at	-1.934034807	4.866488514	-16.14238725	2.11E-06	4.67E-05	5.067218267	Pinlyp
1394846_at	-1.95476848	7.417315156	-19.37131214	6.75E-07	2.11E-05	6.363013925	Pira2
1389347_at	-2.138016906	9.105237435	-21.65383574	3.35E-07	1.28E-05	7.15472577	Pitpnm1
1387459_at	1.282088235	2.954227995	3.466691467	0.012160325	0.042881726	-4.73998411	Pkib
1375034_at	1.432368299	9.794048078	18.81816671	8.09E-07	2.39E-05	6.157021078	Pla2g15
1370202_at	-1.916381548	12.57921055	-45.06407919	3.26E-09	5.96E-07	12.25317635	Pla2g16
1368128_at	-7.43928576	6.01932698	-46.6782799	2.60E-09	5.33E-07	12.48781353	Pla2g2a
1384558_at	2.740713004	4.651279005	66.98610158	2.63E-10	1.49E-07	14.79073799	Plac9
1387122_at	1.587948507	6.001479567	6.762989414	0.000397254	0.002495799	-0.910237158	Plagl1
1387675_at	1.701340671	9.642379433	26.68135373	9.00E-08	5.37E-06	8.63348854	Plau
1387269_s_at	-1.798939261	7.944559592	-21.20437632	3.83E-07	1.41E-05	7.005718272	Plaur
1373175_at	1.776594376	8.190294309	28.42149544	6.04E-08	4.00E-06	9.078512501	Plbd1
1370530_a_at	-1.025299231	9.950521563	-35.97739573	1.36E-08	1.49E-06	10.7218283	Pld1
1390687_at	-2.57777223	9.095200051	-24.01996324	1.75E-07	8.23E-06	7.890469986	Plek
1384570_at	-4.082298352	5.642438029	-8.575775169	0.000100108	0.000841873	0.659390046	Plekha4
1370334_at	1.174003193	9.498965715	14.15471066	4.77E-06	8.69E-05	4.136481727	Plekhb1
1377365_at	-1.555630866	4.284610814	-4.500137651	0.003548274	0.015207795	-3.378782667	Plekhn1
1374594_at	-9.4974839	6.976000915	-235.4548224	8.86E-14	1.36E-09	19.98705168	Plet1
1390383_at	-1.463931115	10.92826659	-14.59464309	3.95E-06	7.56E-05	4.352901944	Plin2
1370297_at	2.432242807	6.876725433	25.33813569	1.25E-07	6.60E-06	8.268630335	Plk1
1377832_at	1.728543084	8.713203	16.61834201	1.76E-06	4.10E-05	5.273506775	Plk4
1387112_at	1.154488748	13.38115949	14.51530751	4.08E-06	7.73E-05	4.314340765	Plp1
1369029_at	-5.091959664	7.874917805	-40.26187916	6.66E-09	9.12E-07	11.49282807	Plscr1
1376872_at	1.253118447	8.592775657	11.29417283	1.91E-05	0.000237589	2.551028564	Plxnc1
1393229_at	1.096852137	9.175481705	13.37904507	6.76E-06	0.000112305	3.738740675	Pmel
1382177_at	-3.215937259	9.248055305	-42.75750215	4.54E-09	7.13E-07	11.90027457	Pml
1397458_at	-1.723549408	7.394185714	-6.556101594	0.000473596	0.002868454	-1.109802715	Pmm2
1370247_a_at	1.157496257	11.12171351	25.42803186	1.22E-07	6.52E-06	8.293671959	Pmp22
1368554_at	1.423204389	9.75744818	16.75224907	1.67E-06	3.95E-05	5.330501508	Pnlip
1368369_at	-2.206389458	8.720554706	-19.57540799	6.32E-07	2.02E-05	6.437535811	Pnoc
1373913_at	-1.648437554	10.83692067	-22.84998049	2.39E-07	1.01E-05	7.536427324	Pnpt1
1376611_at	1.271108611	8.640698091	17.5644701	1.25E-06	3.25E-05	5.666885191	Pola1
1387795_at	1.472140846	5.135698383	6.992698134	0.000328422	0.002138525	-0.69402493	Pola2
1370127_at	1.114929386	7.360690039	10.40084308	3.15E-05	0.000345763	1.978912258	Pold1
1384265_at	-1.237667988	6.851234652	-8.588807981	9.92E-05	0.000836433	0.669642993	Pold3
1389421_at	1.922373429	5.924939256	13.18987101	7.38E-06	0.000119054	3.638414411	Pole
1393982_at	2.422250677	7.005740492	10.04128	3.90E-05	0.00040725	1.736030266	Pole2
1375649_at	1.332075346	6.0182062	6.870173738	0.000363276	0.002325545	-0.80866054	Pou2f2
1372101_at	-1.087815208	13.46231825	-23.06705578	2.25E-07	9.69E-06	7.603502562	Ppap2b
1369785_at	-1.263747346	9.047566221	-9.97596474	4.06E-05	0.0004185	1.691078624	Ppat
1372531_at	1.414756149	4.978529647	7.804510784	0.00017415	0.001293192	0.028024442	Ppfibp2
1387229_at	1.104246727	6.818146681	5.187329762	0.001705689	0.008169523	-2.558046086	Ppig
1370174_at	-1.425846455	7.295696821	-14.05393533	4.99E-06	8.97E-05	4.085999217	Ppp1r15a
1386968_at	2.183309862	8.212497307	19.45942064	6.56E-07	2.08E-05	6.395281247	Ppp1r1a
1372208_at	1.487707933	5.646528564	5.097290895	0.001870603	0.008828941	-2.661801272	Ppp1r1b
1369152_at	-2.009961035	3.82903968	-3.609319809	0.010160782	0.036760139	-4.543375078	Ppp3r1
1370236_at	1.329635793	11.78947305	22.09094885	2.96E-07	1.18E-05	7.296653001	Ppt1
1392975_at	1.461128692	7.710789446	15.09113562	3.21E-06	6.44E-05	4.589731051	Pradc1
1392899_at	1.810259641	9.432297181	39.81685981	7.14E-09	9.57E-07	11.4171472	Prc1
1393657_at	-1.547915333	7.271118612	-11.73817537	1.51E-05	0.000201081	2.820148661	Prcp
1367677_at	-1.482770639	13.43699437	-16.17242398	2.09E-06	4.62E-05	5.080411646	Prdx5
1379369_at	1.278981999	9.043374576	12.34668991	1.11E-05	0.000159477	3.1740683	Prickle1
1370585_a_at	1.546518615	10.5339523	18.42727207	9.23E-07	2.63E-05	6.007772091	Prkcb
1367691_at	1.392238255	11.97821992	11.98437011	1.33E-05	0.000182747	2.965346968	Prkcdbp
1372995_at	-1.100993256	7.624391134	-17.08370801	1.48E-06	3.63E-05	5.469676647	Prkd2
1379304_at	-1.242777904	7.189783498	-12.61946205	9.69E-06	0.000144388	3.327463223	Prkrip1
1368008_at	1.006392139	5.491527657	5.112547225	0.001841439	0.008708733	-2.644142173	Prom1
1383722_at	-1.307777523	7.311264541	-3.729020456	0.00875966	0.032461472	-4.380418359	Prosc
1375485_at	-1.439137718	4.578169299	-11.73274731	1.51E-05	0.000201458	2.816915682	Prrx1
1379747_at	3.427765569	4.501687229	14.26376248	4.55E-06	8.39E-05	4.190724049	Prss35
1368792_at	-1.066489902	4.813295972	-7.473037471	0.000224101	0.001587543	-0.259204538	Psen1
1370064_at	-1.417587529	6.566969371	-14.21832506	4.64E-06	8.50E-05	4.168171949	Psen2
1395165_at	1.10077723	8.582645581	8.3238642	0.000119374	0.000968539	0.45857783	Psip1
1374033_at	-2.354876693	11.10503434	-32.36051947	2.66E-08	2.26E-06	9.98720056	Psmb10
1367786_at	-3.312611013	12.10987165	-91.34609673	3.66E-11	5.16E-08	16.55116654	Psmb8
1370186_at	-3.321732802	12.94176931	-63.14914485	3.82E-10	1.86E-07	14.43024537	Psmb9
1367663_at	-1.334648612	13.55453299	-47.71802389	2.26E-09	4.99E-07	12.63392907	Psme1
1367710_at	-1.740149353	12.86751472	-31.13883546	3.39E-08	2.71E-06	9.718666813	Psme2
1389387_at	-2.044186624	12.18923558	-31.0292524	3.47E-08	2.73E-06	9.694026658	Psmf1
1392162_at	-1.682755818	5.826035631	-11.25944359	1.95E-05	0.000240832	2.529570208	Pspc1
1383426_at	-4.662465855	6.55953493	-24.55836795	1.52E-07	7.63E-06	8.047464803	Pstpip1
1383372_at	-1.012629262	9.926950856	-17.01491648	1.52E-06	3.69E-05	5.441011783	Ptafr
1385901_at	1.422195269	5.963327963	11.78863106	1.47E-05	0.000197225	2.850134293	Ptdss2
1369766_at	-3.586011387	4.093859046	-27.40062643	7.61E-08	4.79E-06	8.821038569	Ptger2
1368014_at	-5.958346635	9.85332275	-34.63443244	1.73E-08	1.76E-06	10.45891501	Ptges
1374532_at	-1.026014022	9.456562954	-9.851454396	4.37E-05	0.000443757	1.604657928	Ptges2
1388102_at	-2.467224825	8.469022458	-9.580321672	5.17E-05	0.000503743	1.413073977	Ptgr1
1368527_at	-2.299474485	11.91389202	-12.44563676	1.06E-05	0.00015406	3.230074996	Ptgs2
1370259_a_at	1.104942694	7.49660611	12.11472025	1.24E-05	0.000174343	3.041106272	Pth1r
1368681_at	1.234993514	4.820736188	5.088896151	0.001886872	0.008884155	-2.671531871	Pthlh
1369688_s_at	-1.019830367	3.336016056	-4.669466221	0.00294419	0.012958017	-3.170306773	Ptk2b
1371508_at	1.352937325	10.12151062	31.21944622	3.33E-08	2.70E-06	9.736732972	Ptp4a2
1383696_at	1.2347225	8.537447992	12.30440591	1.13E-05	0.000162074	3.150006329	Ptpla
1386811_at	-1.677528991	4.589985885	-4.267115283	0.004618768	0.019052801	-3.672461137	Ptplad2
1374774_at	1.260014023	8.15851288	9.151080598	6.81E-05	0.000622102	1.099812583	Ptpn14
1373065_at	-1.278341598	10.10588555	-18.40550741	9.30E-07	2.64E-05	5.999369611	Ptpn18
1374591_at	1.384093189	8.813952518	14.50389972	4.10E-06	7.76E-05	4.308779334	Ptprd
1372917_at	1.171233813	7.196876732	7.597588812	0.000203624	0.001468575	-0.150092701	Ptrh2
1373556_at	1.201676702	8.653848649	9.150416148	6.81E-05	0.000622102	1.09931783	Ptrhd1
1367780_at	1.881249886	9.46667861	13.98123578	5.15E-06	9.18E-05	4.049365593	Pttg1
1370214_at	-2.359061811	3.352355299	-14.82813713	3.58E-06	6.99E-05	4.465232163	Pvalb
1375216_at	-1.963119259	8.409515961	-24.16243429	1.68E-07	8.10E-06	7.93236462	Pvrl2
1388945_at	1.900433878	9.60198793	28.1413493	6.43E-08	4.20E-06	9.008841396	Pxdc1
1390422_at	-1.031395762	9.0849493	-15.87998883	2.34E-06	5.06E-05	4.950932026	Pxk
1383117_at	1.05977259	10.21106454	13.39971538	6.70E-06	0.000111506	3.749621347	Pxmp4
1389873_at	-1.820676747	9.738268104	-20.96702896	4.11E-07	1.49E-05	6.925733101	Pycard
1368674_at	-2.958476405	8.231986125	-31.31692597	3.27E-08	2.65E-06	9.758512797	Pygl
1368024_at	-1.135532723	7.03193011	-6.738319094	0.000405578	0.002535802	-0.933790211	Qsox1
1392876_at	-1.863736934	5.347788486	-9.19352935	6.62E-05	0.000609358	1.131355745	Rab11fip1
1388140_at	-1.222353745	10.90876709	-18.89223102	7.90E-07	2.35E-05	6.184951146	Rab13
1373646_at	1.672450042	4.138038041	7.652308678	0.000195309	0.001419474	-0.102611195	Rab15
1384148_at	-2.472796313	7.702611282	-18.49101677	9.03E-07	2.59E-05	6.032324706	Rab20
1377669_at	2.818843725	5.974197491	19.65882194	6.15E-07	1.98E-05	6.46776879	Rab27a
1370122_at	-2.434884696	5.319631883	-17.1398904	1.45E-06	3.58E-05	5.493003185	Rab27b
1383786_at	-1.932171357	10.38957879	-33.12804322	2.29E-08	2.07E-06	10.15035307	Rab32
1392092_at	1.546052387	6.603046168	5.696108446	0.00103251	0.005404817	-1.99226498	Rab33a
1379144_at	1.058339894	6.054821698	5.1357206	0.001798114	0.008542553	-2.617380661	Rab36
1388632_at	1.018602407	8.366102596	12.34204615	1.11E-05	0.000159772	3.171429503	Rab6b
1383709_at	-1.864722769	8.251871298	-29.05970907	5.25E-08	3.63E-06	9.234553422	Rab8b
1383483_at	1.303360656	6.826655759	8.371037389	0.000115464	0.000943211	0.496568083	Rab9b
1391897_at	-2.765469202	6.23369304	-13.3796231	6.76E-06	0.000112305	3.73904516	Rabgap1l
1372404_at	-1.669489862	11.26548927	-20.49438638	4.74E-07	1.65E-05	6.763687939	Rac2
1373658_at	1.733423038	10.5062554	21.00651024	4.06E-07	1.48E-05	6.939101562	Racgap1
1392449_at	1.242734704	9.209305627	19.83569496	5.82E-07	1.92E-05	6.53145164	Rad18
1380277_at	1.34707978	5.66093424	5.553737795	0.001184363	0.006049021	-2.147145955	Rad51ap1
1393655_at	1.07899097	5.752478055	5.041704921	0.001981346	0.009271424	-2.726414617	Rad54l
1395465_at	-1.721647935	6.503692446	-7.236002493	0.000269922	0.001836827	-0.470933476	Rae1
1398615_at	-1.218879998	7.429226717	-7.500059972	0.000219466	0.001559681	-0.235408363	Rap1gap2
1373933_at	-1.299889296	11.7406791	-11.17302377	2.04E-05	0.000250121	2.475909144	Rapgef2
1373666_at	1.154043135	8.924365708	23.96346746	1.77E-07	8.32E-06	7.873785936	Rapgef5
1376755_at	-2.124192821	6.981093791	-6.472377319	0.000509137	0.003041426	-1.191905655	Rarb
1374165_at	-3.65445191	7.87190074	-14.49532501	4.12E-06	7.78E-05	4.30459629	Rasa4
1378740_at	1.050184142	8.856132672	12.80753023	8.85E-06	0.000135399	3.431423624	Rasal2
1387908_at	-4.511538542	6.11765285	-84.02803364	6.22E-11	6.04E-08	16.10212316	Rasd1
1389811_at	-1.197694894	3.922761986	-4.057841518	0.005893334	0.023307951	-3.942905082	Rasgef1c
1374649_at	1.480231394	4.2714575	8.187256532	0.000131581	0.001043621	0.347536796	Rasgrp2
1390159_at	6.200486523	5.741766654	45.23950746	3.18E-09	5.92E-07	12.2791511	Rasgrp3
1383322_at	-1.137168158	5.98557603	-9.586996098	5.15E-05	0.000501957	1.417847223	Rasl11b
1378484_at	-3.685320572	6.006576327	-22.78927924	2.43E-07	1.03E-05	7.517554034	Rasl12
1391593_at	-1.552983548	9.071819099	-17.35845966	1.34E-06	3.41E-05	5.583040213	Rassf4
1378471_at	1.96615058	4.709111687	9.720576914	4.74E-05	0.000470886	1.512768194	Raver2
1375093_at	-1.665840704	9.023060381	-17.9279997	1.10E-06	2.98E-05	5.812494347	Rbks
1393569_at	-1.957327237	5.946913037	-6.520219021	0.000488471	0.002942086	-1.144894409	Rbm18
1393832_at	-1.742907185	7.2090079	-23.59250954	1.95E-07	8.93E-06	7.763218908	Rbm43
1376728_at	-1.963456343	8.487824568	-25.83730325	1.10E-07	6.10E-06	8.406526091	Rbm47
1374181_at	1.145539102	7.634422965	9.829298117	4.43E-05	0.000448201	1.589178147	Rbmx
1387766_a_at	-2.775209891	3.86101957	-7.903985666	0.000161738	0.001222032	0.112285305	Rbp2
1379302_at	-1.081372196	9.821149085	-23.20058458	2.17E-07	9.53E-06	7.644441419	Rbpj
1375898_at	-1.007073351	6.687811123	-9.721392707	4.74E-05	0.000470886	1.513344345	Rbpms
1389066_at	1.60348307	8.303571435	16.27240675	2.01E-06	4.51E-05	5.124156331	Rcan2
1373452_at	-1.536293921	9.776197354	-29.2078956	5.08E-08	3.54E-06	9.270264006	Rcl1
1397230_at	-1.727510498	2.974569905	-5.97725175	0.000793037	0.004338197	-1.693975892	Rd3
1373886_at	1.764746057	6.371839125	7.137517825	0.000292039	0.001953564	-0.560519103	Reep1
1376160_at	-2.074953145	6.520848769	-11.46154129	1.75E-05	0.0002228	2.653599728	Relb
1377751_at	3.487125917	5.755350652	9.118446281	6.95E-05	0.000632432	1.075476057	Reps2
1390812_a_at	1.577574363	2.902925769	4.769397192	0.002642208	0.011838354	-3.049207305	Rerg
1389326_at	1.155427604	8.60123606	9.446392747	5.63E-05	0.000536839	1.316671662	Rfc3
1388458_at	1.13558183	9.808876222	12.71393604	9.26E-06	0.000139859	3.379867209	Rfc4
1392589_at	1.23850972	9.429770672	18.68052583	8.47E-07	2.47E-05	6.104823343	Rfc5
1385504_at	-1.363652414	4.312560696	-7.722479173	0.000185209	0.001356528	-0.042123594	Rffl
1391817_at	-1.559245429	8.849731726	-17.26346232	1.39E-06	3.48E-05	5.544045352	RGD1304595
1376583_at	1.105786613	9.191437718	16.03525291	2.20E-06	4.81E-05	5.019964329	RGD1304884
1380619_at	-1.229331323	8.985483003	-14.3443747	4.39E-06	8.18E-05	4.230565606	RGD1305537
1382218_at	-2.091244033	7.022136516	-12.01910613	1.31E-05	0.000180879	2.985610077	RGD1305807
1395297_at	-1.067320046	6.539427587	-9.407862616	5.77E-05	0.000546786	1.288715775	RGD1309621
1392838_at	-1.137698968	8.356578693	-9.088156774	7.09E-05	0.000641822	1.052820566	RGD1309995
1377245_a_at	1.047355216	7.292259502	4.449913902	0.003753221	0.015967362	-3.441414439	RGD1311723
1379608_at	1.770042307	6.094318391	13.4646198	6.50E-06	0.000109551	3.783683254	RGD1560010
1379091_at	1.263909036	5.165922808	18.69711432	8.43E-07	2.46E-05	6.11113451	RGD1560755
1388624_at	-2.0106441	10.26335146	-19.72103498	6.03E-07	1.96E-05	6.490233877	RGD1561113
1373889_at	1.65785691	8.797943071	10.97242671	2.28E-05	0.000271262	2.349874073	RGD1561778
1377145_at	2.118447133	5.842533365	11.94029633	1.36E-05	0.00018577	2.939558057	RGD1562101
1372940_at	1.290109647	10.5501908	26.44566793	9.52E-08	5.53E-06	8.57087762	RGD1562339
1380078_at	-1.126794899	4.509684489	-3.874186315	0.007338616	0.028009772	-4.185403096	RGD1562747
1385559_at	1.530362246	8.300156585	18.15186099	1.01E-06	2.82E-05	5.900711511	RGD1563441
1396486_x_at	1.036769759	6.696704357	5.554608757	0.00118336	0.006044893	-2.14619047	RGD1564162
1386857_at	1.049143563	13.32837681	55.23046222	8.95E-10	3.04E-07	13.58693424	RGD1565395 /// Stmn1
1376633_at	1.030859956	8.213112431	14.3999675	4.29E-06	8.03E-05	4.257916672	RGD1566029
1374211_at	1.338734646	5.697518803	4.56107934	0.003316193	0.014355553	-3.303275173	RGD1566084
1390707_at	1.361132506	10.3160772	26.53896964	9.31E-08	5.48E-06	8.595733234	Rgs10
1373777_at	-1.012017823	6.956370097	-5.439411376	0.001324708	0.006628657	-2.273431529	Rgs16
1384765_at	-2.085061	7.450187034	-28.52520475	5.90E-08	3.95E-06	9.104120367	Rhbdf2
1389003_at	1.421620303	8.812531899	21.56060924	3.45E-07	1.31E-05	7.124078689	Rhobtb3
1394122_at	-5.503498334	5.397869749	-21.86253494	3.16E-07	1.23E-05	7.222849267	Rhoh
1395699_at	-1.871915939	9.597605882	-51.3172305	1.43E-09	4.04E-07	13.11174195	Riok3
1381279_at	-2.473274297	9.219982179	-38.63546727	8.64E-09	1.11E-06	11.2115024	Ripk2
1370422_at	-1.657702439	9.752431752	-43.10785001	4.32E-09	7.10E-07	11.95528133	Ripk3
1378320_at	2.245997721	9.949844262	33.51378254	2.13E-08	1.98E-06	10.23080456	Rlbp1
1389053_at	-1.200264681	8.865805764	-18.86900819	7.96E-07	2.36E-05	6.176205469	Rmnd1
1374455_at	1.457561428	8.777160088	13.49758924	6.40E-06	0.000108262	3.800925998	Rnaseh2c
1381533_at	-2.357727564	7.473527533	-19.77485685	5.93E-07	1.94E-05	6.509611568	Rnd1
1385658_at	-3.086045798	8.871950519	-28.87046654	5.47E-08	3.74E-06	9.188666593	Rnf114
1384098_at	-3.620294257	7.565215754	-13.12238322	7.62E-06	0.000121804	3.60229319	Rnf125
1397584_at	1.538289941	8.438276347	9.468221322	5.55E-05	0.000530769	1.332465327	Rnf151
1373514_at	-3.841953048	10.56302359	-28.71540022	5.66E-08	3.82E-06	9.150828015	Rnf213
1393047_at	-1.407656395	9.073155227	-10.89839203	2.37E-05	0.000280012	2.302826746	Rnf217
1398336_at	-1.011118331	8.77774411	-14.33720577	4.41E-06	8.19E-05	4.227031164	Rnf25
1383679_at	-1.04372804	7.912869301	-11.045752	2.19E-05	0.000263835	2.396186399	Rnf31
1381816_at	-1.504482606	3.014095731	-6.407228415	0.000538898	0.003182676	-1.256338878	Rnls
1385806_at	-1.331570232	8.915302317	-13.21359153	7.30E-06	0.000118233	3.651068752	Rp9
1372181_at	1.223002024	10.05630684	35.42322917	1.50E-08	1.60E-06	10.61467194	Rpa1
1388135_at	1.356045246	9.226578903	24.5397714	1.53E-07	7.65E-06	8.042101775	Rpa2
1398308_at	1.060258004	11.19653806	6.567603715	0.000468938	0.002850739	-1.098584423	Rpa3
1380513_at	-1.232703598	9.851388154	-20.14811668	5.27E-07	1.78E-05	6.642556117	Rpap2
1369056_at	2.954135613	5.376284298	10.68315449	2.68E-05	0.000306723	2.164379873	Rpe65
1372133_at	1.184872919	9.714164492	18.95363321	7.74E-07	2.32E-05	6.208023488	Rras2
1371862_at	1.338000419	11.44913578	27.06559218	8.22E-08	5.04E-06	8.734330134	Rrm1
1370913_at	-7.642123195	12.06225373	-23.840007	1.83E-07	8.52E-06	7.837184562	Rsad2
1390943_at	-1.157274845	6.853588777	-4.700101632	0.002847687	0.012619012	-3.133029759	Rsrp1
1370428_x_at	-2.590311437	13.1774988	-27.77038793	6.99E-08	4.50E-06	8.915448393	RT1-A2 /// RT1-A3 /// RT1-EC2
1371213_at	-1.222025902	2.932776996	-4.889553975	0.002324133	0.010622899	-2.905483392	RT1-A3
1377334_at	-9.326305966	6.819009727	-176.029687	5.63E-13	2.92E-09	19.26757458	RT1-Ba
1388203_x_at	-3.804707567	6.101483547	-24.80660855	1.42E-07	7.31E-06	8.118654371	RT1-CE10 /// RT1-EC2
1388236_x_at	-3.329409731	9.530280371	-38.74919408	8.48E-09	1.09E-06	11.23160533	RT1-CE12
1370463_x_at	-1.383406846	5.7556861	-10.98997656	2.26E-05	0.00026936	2.360984199	RT1-CE16
1371209_at	-5.04319255	9.278310489	-51.14645285	1.46E-09	4.08E-07	13.08999706	RT1-CE5
1371210_s_at	-4.323899717	4.558587636	-90.13905978	3.98E-11	5.16E-08	16.48099335	RT1-CE5 /// RT1-EC2
1370883_at	-8.476180936	6.618397898	-89.12337657	4.28E-11	5.18E-08	16.42079987	RT1-Da
1370383_s_at	-6.117857877	5.662710065	-37.0066527	1.14E-08	1.35E-06	10.91608255	RT1-Db1
1388071_x_at	-2.101607577	13.52528416	-45.30266252	3.15E-09	5.90E-07	12.28847326	RT1-EC2
1370429_at	-4.585069601	10.14126425	-25.56555762	1.18E-07	6.37E-06	8.331803632	RT1-EC2 /// Rt1.aa
1387205_at	-2.681769943	9.905063603	-47.48697427	2.34E-09	5.08E-07	12.60178854	RT1-M3-1
1387839_at	-3.515693412	4.572426297	-6.564047674	0.000470372	0.002854399	-1.102051147	RT1-N1 /// RT1-N2
1370400_at	-5.46153255	6.464308085	-25.2888059	1.26E-07	6.66E-06	8.254849652	RT1-N3
1388212_a_at	-4.440412276	11.38520619	-58.6813845	6.09E-10	2.31E-07	13.97235039	RT1-S3
1389734_x_at	-2.954805383	10.22219819	-26.3708646	9.69E-08	5.56E-06	8.55088359	RT1-T24-4
1379285_at	-4.220389222	11.66779993	-22.74732254	2.46E-07	1.03E-05	7.504478697	Rtp4
1368914_at	-1.897895189	8.878120483	-33.58985066	2.10E-08	1.97E-06	10.24655048	Runx1
1385519_at	1.823038264	4.841799153	11.94383334	1.36E-05	0.000185571	2.941630924	Runx1t1
1375954_at	1.210572552	10.59704261	11.75973148	1.49E-05	0.000199093	2.832973938	S100a13
1368382_at	4.25106221	5.424689444	15.24695844	3.01E-06	6.12E-05	4.662508891	S100a3
1367661_at	1.115703089	14.50769496	13.35049821	6.85E-06	0.000113275	3.72368762	S100a6
1368494_at	-2.011752054	6.389082739	-13.66811231	5.92E-06	0.000102288	3.889474207	S100a8
1392647_at	-3.554852886	9.209622417	-25.53068935	1.19E-07	6.41E-06	8.322155975	Saal1
1369552_at	-2.493501197	7.294171509	-14.07679534	4.94E-06	8.90E-05	4.097481037	Samsn1
1383581_at	2.094272611	7.812331234	26.20555074	1.01E-07	5.73E-06	8.506485929	Sapcd2
1392040_at	1.423944842	5.978774212	18.38616775	9.36E-07	2.66E-05	5.991895029	Sass6
1379626_at	1.61579263	8.738272403	25.72921064	1.13E-07	6.23E-06	8.376902199	Satb1
1388462_at	1.296516145	6.499122779	5.650278395	0.001078848	0.00560399	-2.041836681	Sbk1
1392107_at	-1.272370799	7.872161245	-11.28718796	1.92E-05	0.000238289	2.546717646	Sbno2
1373781_a_at	-2.366026402	6.863465897	-16.26216224	2.01E-06	4.51E-05	5.119686234	Sbsn
1390777_at	1.145766772	9.584952416	11.30662191	1.90E-05	0.000236653	2.558705824	Sc5d
1371090_at	-1.924318439	5.648001787	-5.036177375	0.001992756	0.009312204	-2.732863336	Scamp2
1384707_at	-2.599402335	7.410145746	-13.52971528	6.31E-06	0.000107268	3.817689215	Scara5
1386956_at	1.001468582	7.886694349	16.06604496	2.17E-06	4.77E-05	5.033577325	Scarb1
1368379_at	-1.105925322	10.58594	-16.5168575	1.83E-06	4.19E-05	5.230011067	Scarb2
1372887_at	1.282336855	3.86969506	9.47884324	5.51E-05	0.00052819	1.340139089	Scarf2
1370355_at	1.351509242	8.637364696	9.985441384	4.03E-05	0.000417111	1.697616908	Scd1
1368044_at	1.185101807	12.87629909	8.655270198	9.48E-05	0.00080694	0.721724505	Scg2
1370850_at	1.441573556	6.049476563	16.83719754	1.62E-06	3.86E-05	5.366426566	Scn3b
1373188_at	-3.77250001	6.995748089	-9.365484447	5.93E-05	0.000558356	1.25785208	Scn4b
1370973_at	1.640293425	10.98121283	18.90655775	7.86E-07	2.35E-05	6.190341217	Scn7a
1373377_at	-1.000208704	9.090249796	-11.27063298	1.94E-05	0.000239855	2.53649048	Scnm1
1378080_at	-1.121282429	10.19442533	-15.37330727	2.86E-06	5.89E-05	4.720993757	Sco1
1393338_at	2.361548747	6.741470265	18.56506248	8.81E-07	2.53E-05	6.060739381	Scx
1382921_at	-1.068472835	8.008071897	-19.69831639	6.08E-07	1.97E-05	6.482038468	Sdad1
1367849_at	-2.945611721	10.43882244	-31.60335088	3.09E-08	2.57E-06	9.822088408	Sdc1
1382189_at	1.536027131	11.12559523	30.39323695	3.95E-08	3.00E-06	9.549145547	Sdc2
1367721_at	-1.272455249	12.59375312	-18.86942485	7.96E-07	2.36E-05	6.176362478	Sdc4
1382452_at	2.894946142	4.004259624	7.379772356	0.00024098	0.00168145	-0.341866507	Sdpr
1385670_at	-1.110679974	5.038250281	-8.208037441	0.000129635	0.001031871	0.364527787	Sdsl
1376976_at	-2.384335756	4.679164452	-11.71207464	1.53E-05	0.000202968	2.804590273	Sectm1b
1388705_at	1.130618143	9.565338378	9.980585664	4.04E-05	0.000418196	1.694267459	Selm
1391946_at	-1.067901279	4.250142513	-8.777603394	8.72E-05	0.000755536	0.816704397	Selp
1388745_at	-3.467005112	7.878696523	-20.9802162	4.09E-07	1.49E-05	6.930201169	Sema4a
1393134_at	1.427658678	6.835661129	7.192436427	0.000279461	0.001887698	-0.51044402	Sephs1
1368224_at	-4.482093073	4.756206889	-22.09197715	2.96E-07	1.18E-05	7.296983495	Serpina3n
1377034_at	1.576429606	8.815707534	26.48969308	9.42E-08	5.52E-06	8.58261736	Serpinb1a
1368487_at	-6.583399631	5.426953567	-40.76489734	6.15E-09	8.70E-07	11.57723613	Serpinb2
1392264_s_at	-2.950531799	8.149038975	-29.42062837	4.85E-08	3.44E-06	9.321193661	Serpine1
1368256_at	-2.042235217	6.241804488	-29.45713941	4.81E-08	3.42E-06	9.329895219	Serpini1
1372417_at	-1.497474568	9.49214051	-21.29408393	3.73E-07	1.39E-05	7.035713247	Sertad1
1379621_at	-1.676772038	7.31329175	-17.79730571	1.15E-06	3.06E-05	5.760485229	Sertad3
1372248_at	1.690735531	7.187690814	12.13015985	1.24E-05	0.000173427	3.050029461	Sesn1
1391607_at	-1.078280049	8.601093886	-10.30584468	3.33E-05	0.000359912	1.915481684	Sesn2
1391032_at	1.120336229	8.617128458	17.32141411	1.36E-06	3.43E-05	5.567858723	Sez6
1371861_at	1.099324093	8.282534124	11.19628021	2.02E-05	0.000247907	2.490387144	Sfrp1
1390119_at	-1.688459117	7.155947575	-13.09563951	7.71E-06	0.000122777	3.58793066	Sfrp2
1389231_at	-1.389172745	3.5877308	-5.401308252	0.001375585	0.006845787	-2.315904347	Sgip1
1384762_at	1.615457802	8.348824354	13.28238731	7.07E-06	0.000115651	3.687648436	Sgol1
1382843_at	-1.465283513	4.728299977	-7.010014678	0.00032381	0.002114251	-0.677948694	Sgpl1
1368605_at	-1.976354899	6.827948628	-10.99593895	2.25E-05	0.000268782	2.36475508	Sh2b2
1384968_at	-1.891178642	6.273536909	-9.237396841	6.44E-05	0.000596694	1.1638206	Sh3bp2
1384174_at	2.199194767	7.944798792	20.24189464	5.12E-07	1.75E-05	6.675567483	Shcbp1
1388776_at	-1.314319126	12.09122905	-44.94374476	3.31E-09	5.99E-07	12.23529049	Shisa5
1370302_at	1.272409067	8.444324027	11.16672728	2.05E-05	0.000250488	2.471984604	Shroom2
1388828_at	1.103293664	11.40429493	18.30808567	9.61E-07	2.70E-05	5.961637351	Sidt2
1385465_at	-4.548680792	9.418601513	-34.12963828	1.90E-08	1.85E-06	10.35717842	Siglec5
1383379_at	-1.41783811	5.218985937	-5.013516937	0.00204031	0.009503009	-2.759344699	Sik3
1367881_at	1.107288507	10.58408037	10.62598549	2.77E-05	0.000313306	2.127182347	Sirpa
1383962_at	1.065090626	9.891884597	10.44246048	3.08E-05	0.000339341	2.006536368	Siva1
1391317_at	2.236200275	8.468738384	23.59541763	1.95E-07	8.93E-06	7.764092634	Ska1
1382459_at	1.422633172	6.388041801	7.519735696	0.00021616	0.001541435	-0.218125027	Ska3
1377523_at	1.206514111	7.974347864	16.40724606	1.91E-06	4.32E-05	5.182736959	Skida1
1378443_at	-3.030036161	11.70363328	-30.13357638	4.17E-08	3.10E-06	9.489059516	Slamf9
1367877_at	-1.775957871	10.99436545	-23.66157035	1.92E-07	8.83E-06	7.783938116	Slc11a2
1386679_at	1.086990985	10.6693737	10.52755211	2.93E-05	0.000327438	2.062709891	Slc14a1
1398255_at	2.429872809	9.402742962	29.77275154	4.50E-08	3.30E-06	9.404638308	Slc15a2
1370516_at	-1.855362119	9.516702367	-17.28875961	1.38E-06	3.46E-05	5.55445012	Slc15a3
1386981_at	-1.622191835	11.5970644	-34.25254021	1.85E-08	1.84E-06	10.38209936	Slc16a1
1370548_at	-3.079730569	4.737159798	-17.91690834	1.10E-06	2.98E-05	5.808095201	Slc16a10
1368965_at	-4.553889407	5.228097297	-19.97389948	5.57E-07	1.86E-05	6.580816006	Slc16a3
1369693_a_at	-1.760113683	5.559763825	-8.827413921	8.43E-05	0.000735904	0.855053885	Slc1a2
1387434_at	-4.884849093	5.84982454	-14.03965357	5.02E-06	9.01E-05	4.078816896	Slc22a4
1383444_at	2.135436992	4.079077647	5.364806979	0.0014264	0.007046804	-2.356773161	Slc24a2
1376165_at	1.771197175	6.833005182	8.563038865	0.000100992	0.000847703	0.649357594	Slc24a3
1376936_at	-1.529532725	8.840940316	-19.07905203	7.42E-07	2.26E-05	6.254919392	Slc24a6
1374800_at	1.077572099	8.118356785	9.230249559	6.47E-05	0.000599102	1.158540283	Slc25a15
1392978_at	-2.664488588	7.958413782	-17.23798113	1.40E-06	3.50E-05	5.533549728	Slc25a28
1392789_at	-2.09440186	8.255540619	-19.22375841	7.08E-07	2.19E-05	6.308645689	Slc25a36
1382688_at	-3.557950336	6.928015668	-11.28898753	1.92E-05	0.000238152	2.547828541	Slc25a37
1388051_at	4.05139294	4.204466925	16.2620365	2.01E-06	4.51E-05	5.11963135	Slc26a3
1390192_at	-4.123262379	8.827447607	-58.00829022	6.55E-10	2.43E-07	13.89946824	Slc27a3
1368227_at	-4.298541757	9.989881378	-40.06535661	6.86E-09	9.31E-07	11.45952468	Slc28a2
1370848_at	-2.012670359	11.45238562	-26.48124084	9.43E-08	5.53E-06	8.580365072	Slc2a1
1389310_at	1.887993365	8.896322057	17.93613891	1.09E-06	2.98E-05	5.815720869	Slc2a13
1383971_at	1.759208237	5.0263557	4.990356786	0.002090235	0.009705019	-2.786484141	Slc30a10
1394954_at	-2.236144992	8.076786122	-27.87721767	6.82E-08	4.40E-06	8.94247819	Slc31a2
1378899_at	2.331874107	6.438403239	9.479536901	5.51E-05	0.000528121	1.34063996	Slc35d3
1382076_at	-1.413410882	7.458901711	-8.475576489	0.00010731	0.000890639	0.580119803	Slc37a1
1369074_at	2.038612754	3.128948871	4.858797814	0.002401247	0.010928785	-2.942076827	Slc38a4
1373984_at	-3.039754752	8.174726004	-44.38707376	3.58E-09	6.30E-07	12.1518151	Slc39a14
1393162_at	-1.045727933	10.69640646	-11.5648815	1.65E-05	0.000214613	2.716245673	Slc39a6
1376709_at	-3.61198366	10.05808422	-73.79661629	1.42E-10	1.00E-07	15.36621569	Slc39a8
1376972_at	-1.153179352	6.730264326	-9.681218213	4.86E-05	0.000480256	1.484920431	Slc40a1
1379736_at	-1.134087177	9.571317793	-14.84101992	3.56E-06	6.97E-05	4.471380133	Slc43a2
1383471_at	3.135473189	6.229491828	15.91638559	2.30E-06	5.01E-05	4.967173343	Slc46a3
1390835_at	-1.423591007	4.265693075	-13.26904249	7.11E-06	0.000115939	3.680566853	Slc47a1
1373613_at	-1.831198966	10.39565356	-17.41140896	1.32E-06	3.37E-05	5.604683725	Slc48a1
1387656_at	-3.487558851	3.853421919	-17.56604191	1.25E-06	3.25E-05	5.667521166	Slc4a1
1368170_at	1.212305831	9.983444834	13.71525608	5.80E-06	0.000100817	3.913769303	Slc6a1
1387968_at	1.527101366	9.370118322	26.30903861	9.83E-08	5.63E-06	8.534313403	Slc6a15
1369705_at	-1.566791737	8.862041533	-9.855243935	4.36E-05	0.000443309	1.60730245	Slc6a20
1378133_at	-3.019708783	9.237330595	-23.97769059	1.77E-07	8.30E-06	7.877990059	Slc7a11
1387808_at	-1.339638675	9.195360805	-13.35002733	6.85E-06	0.000113275	3.723439066	Slc7a7
1372449_at	1.458701957	10.92127835	19.96176277	5.59E-07	1.86E-05	6.576494755	Slc8a1
1390440_at	1.109504888	9.068234768	13.3013567	7.01E-06	0.000114939	3.697703177	Slc9a6
1378131_at	3.226223957	7.152670704	26.380849	9.66E-08	5.56E-06	8.553555729	Slc9a9
1368295_at	3.79506218	5.613958011	10.97955933	2.27E-05	0.000270399	2.354391407	Slco2b1
1373734_at	-1.886352868	9.143466432	-44.34589137	3.61E-09	6.30E-07	12.14559111	Slco3a1
1389067_at	-2.760485355	4.368912231	-16.18682868	2.07E-06	4.60E-05	5.086730299	Slco4a1
1379957_at	-2.249817931	11.28866478	-20.53777938	4.68E-07	1.64E-05	6.778721853	Slfn13
1377916_at	-2.675372352	11.71461694	-39.77102313	7.19E-09	9.60E-07	11.40929767	Slfn2
1387134_at	-5.259130234	11.37134329	-25.12872862	1.31E-07	6.89E-06	8.209937512	Slfn3
1388880_at	-3.424330126	9.998222329	-36.95337544	1.15E-08	1.36E-06	10.90617552	Slfn5
1395986_at	1.020598298	10.79264661	23.4223323	2.05E-07	9.21E-06	7.711895786	Slit2
1391019_at	1.570061345	6.933962673	6.637650799	0.000441668	0.002717734	-1.030581409	Slitrk1
1367998_at	-4.938570187	8.067413092	-64.20027995	3.44E-10	1.77E-07	14.53184702	Slpi
1389127_at	-1.086762098	8.932004122	-12.70433661	9.30E-06	0.000140374	3.374559202	Smad3
1378255_at	1.028395944	6.214513637	9.640840712	4.98E-05	0.000489566	1.456247895	Smad5
1371665_at	1.039122641	8.741026988	14.13100534	4.82E-06	8.74E-05	4.124637769	Smarcd3
1372843_at	1.623369245	6.088790323	8.991705589	7.56E-05	0.000674617	0.980241158	Smco4
1381304_at	-1.198615644	3.229703539	-3.361720835	0.013906374	0.048058041	-4.886296789	Smg7
1390435_at	1.490541679	7.963935374	14.32785748	4.43E-06	8.21E-05	4.222419704	Smim4
1389475_at	1.921841917	7.139402301	13.78715201	5.62E-06	9.82E-05	3.950667473	Smo
1388545_at	1.288381196	8.002804907	22.01995459	3.02E-07	1.19E-05	7.273797393	Smoc1
1372684_at	1.100139869	3.634570241	7.014727404	0.000322568	0.002107302	-0.673578849	Smtn
1370898_at	-1.125188763	11.99333437	-13.019406	8.00E-06	0.000125813	3.546837399	Snn
1379275_at	-2.674484362	7.759131855	-15.31702732	2.92E-06	5.99E-05	4.695000433	Snx10
1369002_at	-2.147730562	4.500363652	-6.1736625	0.000663072	0.00376152	-1.491352699	Soat1
1369584_at	-3.13841394	4.139860772	-15.32999955	2.91E-06	5.96E-05	4.70099996	Socs3
1370172_at	-3.536616869	13.62567677	-59.33864048	5.67E-10	2.30E-07	14.04249283	Sod2
1387018_at	1.515137288	9.093843518	19.47320793	6.53E-07	2.07E-05	6.400317209	Sorbs2
1389193_at	1.431743668	4.650359916	5.617582824	0.001113344	0.005760088	-2.077366735	Sorcs2
1393933_at	2.079902722	7.916819892	16.51709021	1.83E-06	4.19E-05	5.230111107	Sorl1
1372728_at	1.262077486	8.435684002	24.04526522	1.73E-07	8.21E-06	7.897928918	Sort1
1386065_at	-1.449955594	11.40559192	-24.70452116	1.46E-07	7.42E-06	8.089467857	Sowahc
1387275_at	1.018571727	7.468051006	5.42157964	0.001348249	0.006730206	-2.293284183	Sox11
1375153_at	-1.168938737	9.00420523	-5.026694333	0.002012503	0.009388964	-2.743936659	Sox2
1373860_at	1.444768329	10.4345876	12.1368879	1.23E-05	0.00017297	3.053914576	Sox4
1384415_at	-1.589993893	4.27115122	-4.407897619	0.003934858	0.016626378	-3.49409179	Sox7
1379742_at	-2.422645492	8.866307012	-11.89774754	1.39E-05	0.000188937	2.914577508	Sp100
1394819_at	-4.089843353	9.444058172	-46.10182415	2.82E-09	5.48E-07	12.40513313	Sp110
1374838_at	-2.09082486	8.138311683	-19.39255781	6.70E-07	2.10E-05	6.370808006	Sp140
1370999_at	1.893553591	7.925281332	14.08765687	4.91E-06	8.87E-05	4.102930173	Spag5
1372027_at	-1.58302399	9.59758919	-12.31622288	1.13E-05	0.000161466	3.156738616	Spata13
1373026_at	1.380953418	9.328534539	13.75248073	5.70E-06	9.95E-05	3.932896549	Spc24
1389668_at	2.092291738	9.702968059	20.27350741	5.07E-07	1.74E-05	6.686660964	Spc25
1373998_at	1.068843042	9.315336792	14.34829839	4.39E-06	8.17E-05	4.232499355	Specc1
1368001_at	2.636872278	6.716383617	16.97446531	1.54E-06	3.71E-05	5.424102797	Speg
1383603_at	-1.290131502	10.31068454	-16.68826924	1.71E-06	4.01E-05	5.303325844	Sppl2a
1384721_at	-8.353506147	7.150058945	-30.44970464	3.90E-08	2.98E-06	9.562139538	Sprr2d
1393805_at	-1.60135526	4.15608766	-9.036876733	7.34E-05	0.000658943	1.014315639	Spsb1
1371046_at	1.322094835	3.521130395	5.301380005	0.00151982	0.007430418	-2.428214595	Sptbn1
1374457_at	-1.359886871	8.902035203	-16.18699339	2.07E-06	4.60E-05	5.086802516	Sptlc2
1371715_at	1.359910269	11.94141998	23.23149543	2.15E-07	9.52E-06	7.653883953	Sptssa
1387017_at	1.310221012	10.21314365	14.96857623	3.37E-06	6.69E-05	4.531976535	Sqle
1389381_at	-1.021737018	10.72863873	-8.07918037	0.000142256	0.001105179	0.258588178	Sqstm1
1388426_at	-1.552221891	10.2953479	-39.47349108	7.54E-09	9.88E-07	11.35809505	Srebf1
1392134_x_at	-1.361519703	8.756678305	-15.92221855	2.30E-06	5.01E-05	4.969772819	Srgap2
1368655_at	-4.096201237	11.84505055	-55.17880805	9.00E-10	3.04E-07	13.58093634	Srgn
1373000_at	1.237640442	6.658483778	15.59082864	2.62E-06	5.53E-05	4.82059691	Srpx2
1381103_a_at	-1.041004785	6.511294218	-8.0471153	0.000145612	0.001124477	0.232008201	Srrd
1371999_at	1.160012775	9.394692215	18.93212501	7.79E-07	2.33E-05	6.199950123	Srsf6
1372510_at	-2.727362281	8.998909296	-29.26677231	5.02E-08	3.51E-06	9.284398896	Srxn1
1379451_at	-1.061620963	5.910026159	-4.390676733	0.004012121	0.016906903	-3.515756181	Ssbp2
1368517_at	1.299023559	8.546839093	7.378275196	0.000241262	0.001683044	-0.343200236	Ssbp3
1369718_at	-2.557853945	8.059946997	-6.64667724	0.000438287	0.002698531	-1.021857597	Ssr3
1369732_a_at	1.064967169	9.766891375	15.52789847	2.69E-06	5.61E-05	4.791920588	St3gal2
1383309_at	-1.502112501	9.170227856	-17.20113677	1.42E-06	3.52E-05	5.518346567	St3gal6
1374247_at	1.832493872	8.73237871	27.51534773	7.41E-08	4.69E-06	8.85047284	Stab1
1382337_at	2.943010197	3.641458943	6.232906693	0.000628749	0.003602998	-1.431139067	Stap1
1389420_at	-2.748504969	6.634147176	-24.12102684	1.70E-07	8.15E-06	7.920214811	Stap2
1388948_at	1.225058386	6.69402973	6.078766936	0.000722576	0.004030048	-1.588669673	Stard10
1393183_at	-2.896814037	6.031479858	-17.00554286	1.52E-06	3.70E-05	5.437097042	Stard5
1368835_at	-2.936706166	12.05518174	-49.73756609	1.74E-09	4.38E-07	12.90717255	Stat1
1389571_at	-3.423558969	11.30801866	-35.39922107	1.50E-08	1.60E-06	10.60998785	Stat2
1371781_at	-1.167666533	9.530949864	-10.22399991	3.50E-05	0.000373914	1.860411746	Stat3
1368231_at	-1.784107437	7.43261122	-17.84977948	1.13E-06	3.03E-05	5.781412269	Stat5a
1377404_at	2.070127493	6.662073908	24.47121066	1.55E-07	7.76E-06	8.022293253	Stc1
1393706_at	-2.215113182	7.108731765	-12.00217072	1.32E-05	0.000181873	2.975737683	Steap1
1385397_at	-3.328665499	10.07525683	-24.38931809	1.59E-07	7.82E-06	7.998557508	Steap4
1383741_at	1.573220849	6.748845362	9.5229021	5.36E-05	0.000517929	1.371888971	Stil
1387502_at	-1.487721988	9.136375843	-15.04709526	3.27E-06	6.52E-05	4.569029971	Stk17b
1387059_at	1.103725273	7.708647116	18.24951832	9.81E-07	2.75E-05	5.938857511	Stk39
1373590_at	1.361503116	10.05992042	19.73662146	6.00E-07	1.95E-05	6.495850995	Stom
1377918_at	-1.630460545	8.880276961	-24.36871575	1.59E-07	7.82E-06	7.992573148	Stoml1
1379732_at	-1.003358049	6.36237789	-6.998779207	0.000326794	0.002129262	-0.688375908	Stx11
1390447_at	-1.414912513	8.45751623	-28.55230103	5.86E-08	3.94E-06	9.110794723	Stx3
1369057_at	-1.577897436	6.055133881	-11.85154296	1.42E-05	0.000192398	2.887356622	Stxbp2
1374957_at	1.277178023	6.455006385	5.75472132	0.000976494	0.005157606	-1.929257961	Stxbp5
1389086_at	1.764002445	5.74074	24.32909822	1.61E-07	7.89E-06	7.98105073	Susd4
1376572_a_at	-1.303060615	10.71419603	-26.71829224	8.92E-08	5.35E-06	8.643248858	Svil
1368186_a_at	1.066025133	7.181494533	8.786540766	8.67E-05	0.000752244	0.823599026	Syk
1390397_at	1.140328825	4.720056803	5.226954763	0.001638353	0.0078994	-2.512737356	Syndig1
1370264_at	1.750607048	6.656431785	13.03002784	7.96E-06	0.000125353	3.552576644	Syne1
1377653_at	1.015591272	10.10301262	11.47160709	1.74E-05	0.000221987	2.659724537	Syne2
1383686_at	2.983777047	6.382588938	21.67675831	3.33E-07	1.28E-05	7.162240731	Syngr1
1372658_at	3.541263803	8.27219623	25.37594747	1.23E-07	6.58E-06	8.279174491	Synm
1371679_at	-1.121104721	7.184534543	-10.44321503	3.08E-05	0.000339341	2.007036295	Synpo2
1370418_s_at	1.178075957	3.086485755	13.23850718	7.22E-06	0.000117111	3.66433753	Syt17
1387662_at	-2.298171202	5.515142235	-9.417454558	5.73E-05	0.000543958	1.295684645	Syt4
1390149_at	1.296392828	9.577733209	10.57192078	2.86E-05	0.000321044	2.091837823	Tacc2
1372886_at	1.626101371	8.930179096	50.35944553	1.61E-09	4.19E-07	12.9886348	Tacc3
1397958_at	-3.437109708	5.739643737	-10.80211236	2.51E-05	0.000292168	2.241206527	Tagap
1367570_at	2.264644358	13.26245937	20.62458045	4.55E-07	1.60E-05	6.808698871	Tagln
1387529_a_at	2.943938534	6.24729755	20.66963027	4.49E-07	1.59E-05	6.824206756	Tagln3
1388149_at	-3.973664208	10.57670243	-45.05579185	3.26E-09	5.96E-07	12.25194636	Tap1
1368732_at	-3.0168701	8.97625132	-30.04628234	4.25E-08	3.15E-06	9.468734997	Tap2
1369726_at	-2.924988185	9.068194743	-34.56414054	1.75E-08	1.77E-06	10.44484615	Tapbp
1385716_at	1.422021185	7.863618404	12.4445046	1.06E-05	0.000154073	3.229436524	Tbc1d16
1376880_at	-1.224418736	11.07495274	-10.59054838	2.83E-05	0.000317866	2.104033926	Tbk1
1383606_at	3.625965169	5.017028312	12.5875189	9.84E-06	0.000146165	3.309661278	Tc2n
1378855_a_at	1.314698932	6.08524799	8.697730815	9.21E-05	0.000788408	0.754819998	Tceal3 /// Tceal5 /// Tceal6
1378856_at	1.075460697	7.397445081	9.442385921	5.64E-05	0.000537906	1.313769126	Tceal3 /// Tceal6
1389555_at	1.606718891	9.13169582	16.57005518	1.79E-06	4.14E-05	5.252843884	Tcf19
1392621_at	-1.105839625	7.304455604	-10.34058573	3.27E-05	0.000354874	1.938739	Tcf25
1376197_at	1.677983306	6.873610953	10.00380724	3.99E-05	0.000413755	1.710272488	Tcf7
1380019_at	-1.576733911	8.606378096	-11.06520343	2.17E-05	0.000262029	2.40842487	Tcirg1
1367765_at	1.097544662	11.08570457	13.54607917	6.26E-06	0.000106703	3.826213282	Tcn2
1370351_at	-1.405946594	10.64722209	-38.48381816	8.86E-09	1.12E-06	11.18459234	Tdrd7
1379318_at	1.255828534	6.627157738	5.692840378	0.001035738	0.00541807	-1.995790945	Tdrp
1375656_at	1.199457776	5.693652107	9.648719802	4.96E-05	0.000487726	1.461851228	Tecpr1
1382814_at	1.470034337	6.682331819	7.808222355	0.000173668	0.001290908	0.031184091	Tenm3
1384049_at	2.779067888	4.437452038	15.18050997	3.09E-06	6.26E-05	4.631562256	Tfap2b
1393337_at	-1.873724981	6.52791727	-7.44978273	0.00022818	0.001610566	-0.279738031	Tfcp2l1
1390818_at	1.343670927	4.878662815	12.71080139	9.27E-06	0.000140003	3.378134315	Tfdp2
1378428_at	-2.462962661	8.849516733	-35.79394898	1.40E-08	1.53E-06	10.68655933	Tfec
1377340_at	-1.061592687	7.168006689	-7.205754948	0.000276505	0.001872083	-0.498345366	Tfpi2
1388099_a_at	-1.353405329	7.346787163	-9.164022397	6.75E-05	0.000619148	1.109442904	Tfpt
1387172_a_at	1.18856516	10.20212512	17.09513377	1.48E-06	3.62E-05	5.474426658	Tgfb2
1367859_at	1.103097182	8.99546832	16.62734031	1.75E-06	4.10E-05	5.277350818	Tgfb3
1376636_at	2.175458851	12.63782309	51.39370366	1.41E-09	4.03E-07	13.1214506	Tgfbr1
1373421_at	-1.004398669	11.77074123	-18.20014371	9.97E-07	2.78E-05	5.919596675	Tgif1
1390681_at	1.485154752	6.956332735	21.24241176	3.78E-07	1.40E-05	7.018451636	Tgif2
1370051_at	-2.64551951	3.656286387	-63.0270379	3.87E-10	1.86E-07	14.41829796	Tgm1
1369943_at	-2.882105937	11.19768382	-55.85004021	8.34E-10	2.98E-07	13.65833456	Tgm2
1371028_at	-1.452410873	4.944288475	-6.089342059	0.000715654	0.00400146	-1.57777134	Tgoln2
1375951_at	-1.817973991	7.18317831	-10.76639636	2.56E-05	0.000296781	2.218220946	Thbd
1388138_at	1.329629358	4.348527351	4.172488316	0.005152603	0.020842978	-3.793965235	Thbs4
1369652_at	1.071065993	4.734622686	5.939543823	0.000821169	0.004462265	-1.733412176	Thy1
1378418_at	-1.180034727	2.823446659	-3.787162891	0.008156986	0.030585256	-4.301961803	Tifab
1368522_at	2.106519888	6.924878562	12.23718396	1.17E-05	0.00016636	3.111593877	Timeless
1390237_at	1.109353731	10.55683957	14.47405536	4.16E-06	7.83E-05	4.294209943	Timm8a1
1367712_at	-1.402322213	13.82594194	-37.33967607	1.07E-08	1.30E-06	10.97765096	Timp1
1367823_at	1.159557536	4.034272963	4.963083511	0.002150796	0.009931344	-2.818539704	Timp2
1375138_at	1.290929938	10.26083973	21.82393198	3.19E-07	1.24E-05	7.210298541	Timp3
1367650_at	3.976551002	4.468927142	11.49994382	1.71E-05	0.000219557	2.676940258	Tinagl1
1374446_at	-1.579038254	9.323350297	-24.17946814	1.67E-07	8.09E-06	7.937356469	Tiparp
1377322_at	-1.205857222	6.395339572	-9.175125428	6.70E-05	0.000615235	1.117695555	Tirap
1372631_at	2.57312899	7.211712678	30.37003342	3.97E-08	3.00E-06	9.543798597	Tk1
1387495_at	-1.00815086	6.483549345	-5.592407317	0.001140757	0.00586193	-2.104818985	Tle4
1384946_at	-4.696761791	5.192035613	-22.76518402	2.45E-07	1.03E-05	7.510048045	Tlr1
1392280_at	-1.728170898	11.23228808	-36.01988754	1.35E-08	1.49E-06	10.72996927	Tlr2
1382531_at	-3.708178821	9.531689901	-61.71704924	4.42E-10	1.99E-07	14.2881809	Tlr7
1382078_at	-2.209864829	10.67280345	-26.5514136	9.28E-08	5.48E-06	8.599041392	Tlr8
1373847_at	2.371037762	5.499274961	10.97524633	2.28E-05	0.000270942	2.351660155	Tm4sf1
1368706_at	2.791017583	3.700674731	8.133289914	0.000136793	0.00107301	0.303244051	Tm4sf4
1389725_at	1.962159624	8.071416672	21.37265097	3.64E-07	1.36E-05	7.061878072	Tm7sf2
1395343_at	-1.057998206	6.924537018	-5.284098924	0.001546456	0.00753222	-2.447773293	Tm9sf3
1394808_at	-1.061144853	6.319046093	-6.054979409	0.000738427	0.004099033	-1.61323347	Tm9sf4
1391818_at	-3.360815194	4.673048934	-16.906305	1.58E-06	3.78E-05	5.39552123	Tmco4
1374948_at	-4.090990208	9.363037761	-46.16425745	2.79E-09	5.48E-07	12.41414664	Tmem106a
1382010_at	1.24534736	9.545916017	16.67640604	1.72E-06	4.03E-05	5.298275665	Tmem107
1390042_at	-2.568531722	8.892137195	-36.70251316	1.20E-08	1.39E-06	10.85931249	Tmem140
1390226_at	-2.245759338	8.524865036	-11.90498267	1.39E-05	0.000188565	2.91883112	Tmem173
1373204_at	1.202190169	11.43364803	16.8637818	1.61E-06	3.83E-05	5.377632575	Tmem176a
1376106_at	-1.008180747	7.10685332	-7.069152391	0.000308609	0.002040426	-0.623278114	Tmem178a
1379419_at	1.891545344	9.476391644	25.94324316	1.07E-07	5.99E-06	8.435434843	Tmem184c
1394160_at	-2.00876654	9.054842478	-40.39439916	6.52E-09	9.02E-07	11.51518128	Tmem2
1376623_at	2.281199784	3.892448707	7.031651711	0.000318151	0.002086942	-0.657904651	Tmem204
1394295_at	1.350412676	6.38126594	9.398788633	5.80E-05	0.000549117	1.282117499	Tmem255a
1397227_at	1.044196062	4.245284746	6.394863391	0.000544767	0.003212918	-1.268622519	Tmem35
1388103_at	-1.741590174	10.83850169	-29.15745618	5.14E-08	3.57E-06	9.258130581	Tmem37
1383593_at	1.42759499	9.210436446	14.54628383	4.03E-06	7.65E-05	4.329420917	Tmem56
1376691_at	1.430030429	9.591547651	18.95209418	7.74E-07	2.32E-05	6.207446099	Tmem64
1373309_at	-1.266059691	10.75809686	-19.42384306	6.64E-07	2.09E-05	6.382269597	Tmem86a
1396086_at	1.403819877	8.854713154	14.6869912	3.80E-06	7.32E-05	4.397534663	Tmem97
1388718_at	-1.396617959	7.945419908	-23.74040855	1.88E-07	8.67E-06	7.807514689	Tmod1
1368136_at	1.167665436	9.819151499	19.28112972	6.95E-07	2.16E-05	6.329834444	Tmpo
1373401_at	1.156472752	13.47875738	20.91440049	4.17E-07	1.51E-05	6.907873277	Tnc
1391384_at	-1.88225102	5.11400574	-11.76481324	1.49E-05	0.000198823	2.835994277	Tnf
1388773_at	-3.640475696	7.906541662	-43.03678556	4.36E-09	7.10E-07	11.94416564	Tnfaip2
1385641_at	-3.725535083	9.690061416	-48.29432827	2.10E-09	4.87E-07	12.71329502	Tnfaip3
1379760_at	-1.016459839	9.694696585	-14.7780445	3.65E-06	7.11E-05	4.441277731	Tnfaip8l2
1369407_at	2.192439068	8.074058511	21.15376897	3.88E-07	1.43E-05	6.988740166	Tnfrsf11b
1376327_at	-6.136260975	5.344872414	-61.11170793	4.71E-10	2.06E-07	14.22682844	Tnfrsf14
1392731_at	-6.77703286	7.057032667	-24.27702384	1.63E-07	7.97E-06	7.965875803	Tnfrsf1b
1375900_at	-4.67596462	5.240433536	-16.97050104	1.54E-06	3.71E-05	5.422443561	Tnfrsf9
1377353_a_at	1.176348979	8.742169426	15.68276593	2.53E-06	5.38E-05	4.862289708	Tnfsf13
1388492_at	-2.258396097	11.23687989	-37.76215557	9.99E-09	1.23E-06	11.05488155	Tnip1
1383655_at	-2.206052527	8.880390409	-25.65222002	1.15E-07	6.30E-06	8.355722905	Tnip2
1368237_at	3.982106247	8.040121703	14.871654	3.51E-06	6.90E-05	4.48597878	Tnmd
1367592_at	4.385386832	7.322001292	33.42784947	2.16E-08	2.00E-06	10.21296965	Tnnt2
1369692_at	1.145460412	8.615151336	11.60101668	1.62E-05	0.000211976	2.738029535	Tnr
1388145_at	1.816759306	7.256121513	13.70774199	5.82E-06	0.000101046	3.909902319	Tnxb
1378572_at	-2.115215982	5.651352834	-13.74871904	5.71E-06	9.96E-05	3.930965914	Tollip
1388650_at	1.778834216	10.42063283	29.05942145	5.25E-08	3.63E-06	9.234483923	Top2a
1375969_at	-1.192937157	5.950855289	-6.91665231	0.000349581	0.002253315	-0.764990508	Tor1aip2
1373406_at	-2.098678961	10.47603427	-31.11848676	3.40E-08	2.71E-06	9.714098391	Tor1b
1372868_at	-4.025984644	9.333724484	-45.8287746	2.93E-09	5.62E-07	12.36554323	Tor3a
1382579_at	1.272378494	8.790834151	20.31430263	5.01E-07	1.72E-05	6.70095099	Tox3
1375420_at	-1.303294559	7.804244226	-14.55188079	4.02E-06	7.64E-05	4.332142382	Tp53i11
1374096_at	1.072932592	4.819092542	5.524825438	0.001218197	0.00619335	-2.178920397	Tpbgl
1372626_at	1.22300355	2.817961543	4.621429815	0.003102967	0.01355135	-3.229028755	Tpd52l1
1383270_at	1.257785494	5.807860962	12.5952949	9.80E-06	0.00014575	3.313998748	Tpgs2
1370288_a_at	1.538125109	11.57258696	42.34284206	4.83E-09	7.30E-07	11.83449443	Tpm1
1372219_at	3.210109812	12.05473319	52.83738787	1.19E-09	3.56E-07	13.30148444	Tpm2
1387918_at	-1.339377462	10.66108905	-9.599573135	5.11E-05	0.000499275	1.426833815	Tpm3
1370821_at	1.24714119	7.431735841	6.605902968	0.000453797	0.002779174	-1.061335816	Tpmt
1372664_at	-1.124799457	7.076110541	-10.50636125	2.97E-05	0.000329814	2.048759043	Traf2
1371551_at	1.244759771	9.096085646	16.58610391	1.78E-06	4.13E-05	5.259718001	Traf4
1373757_at	-1.841702066	10.32955485	-29.11476475	5.18E-08	3.60E-06	9.247843516	Trafd1
1376485_at	1.056226769	5.049873581	6.261586473	0.000612861	0.003535407	-1.402138218	Traip
1392759_at	2.774224806	9.642954785	34.48661869	1.78E-08	1.79E-06	10.42929376	Trem2
1378257_at	-3.534830318	9.580663224	-26.88572123	8.57E-08	5.21E-06	8.687312147	Trex1
1388821_at	1.281616138	10.14509084	22.36333151	2.74E-07	1.12E-05	7.383652764	Trib2
1386321_s_at	-4.488476622	4.921967587	-68.9520502	2.19E-10	1.36E-07	14.96485691	Trib3
1374496_at	1.353019748	11.27881735	38.40369326	8.98E-09	1.14E-06	11.17032604	Tril
1381858_at	-1.824679704	3.413992731	-17.78612501	1.15E-06	3.07E-05	5.756018357	Trim14
1377726_at	-2.311218417	9.119338806	-26.45198205	9.50E-08	5.53E-06	8.572562599	Trim25
1378293_at	-1.792086536	6.0210065	-19.77899742	5.92E-07	1.94E-05	6.511100116	Trim26
1390909_at	-4.644620144	9.469345503	-34.02675292	1.93E-08	1.88E-06	10.33624059	Trim30
1385252_at	-2.424052663	11.00471975	-22.81344178	2.42E-07	1.02E-05	7.525072839	Trim34
1372616_at	1.766876498	4.894439509	18.32224117	9.57E-07	2.69E-05	5.967132281	Trim36
1373398_at	1.020933332	8.430953404	10.98638245	2.26E-05	0.000269689	2.358710227	Trim37
1372112_at	-1.954444767	11.10754406	-64.13653556	3.46E-10	1.77E-07	14.52574842	Trim5
1387486_at	1.150228101	6.549989874	7.317794748	0.000252999	0.001744955	-0.397259347	Trim9
1387449_at	-1.37190535	5.208146346	-7.11895296	0.000296436	0.001977024	-0.577514919	Tshr
1381070_at	1.280760434	4.127125747	3.611575714	0.010132204	0.036673813	-4.540286402	Tslp
1377630_at	1.205136635	10.99675853	16.37750488	1.93E-06	4.36E-05	5.169856583	Tspan13
1368104_at	1.185291149	10.61036836	20.79024791	4.33E-07	1.54E-05	6.865560388	Tspan2
1380725_at	-2.5562292	7.761929894	-30.42729973	3.92E-08	2.98E-06	9.556986952	Tspan5
1368052_at	4.295332892	7.55567147	9.73121112	4.71E-05	0.000468786	1.520275218	Tspan8
1370249_at	-1.854651985	12.595901	-27.43476435	7.55E-08	4.77E-06	8.829810943	Tspo
1390097_at	1.315684675	6.860284048	7.870185936	0.000165838	0.001245748	0.083752946	Tspyl4
1373603_at	-1.02265797	9.355148653	-11.13190024	2.09E-05	0.000254199	2.450240612	Tsr3
1377860_at	-1.822386598	6.812259906	-22.1063843	2.94E-07	1.18E-05	7.301612312	Ttc39b
1376974_at	-1.046212523	7.265658882	-10.78108723	2.54E-05	0.000295092	2.227683846	Ttc7a
1379448_at	1.839947891	8.552845265	14.22943987	4.62E-06	8.47E-05	4.173694976	Ttk
1375905_at	1.336493888	12.71231902	20.42359482	4.84E-07	1.68E-05	6.739092424	Ttyh1
1398335_at	1.379065382	10.17554454	23.24249056	2.15E-07	9.52E-06	7.657239597	Ttyh3
1390766_at	-2.014433278	6.737470213	-5.925455102	0.000831969	0.004511493	-1.748191531	Tuba8
1398624_x_at	1.369298623	4.233854881	5.108435886	0.001849248	0.008742741	-2.648897852	Tubb4a
1370290_at	1.029286008	12.34207112	22.95237151	2.32E-07	9.93E-06	7.568146705	Tubb5
1383568_at	1.467240903	4.997721378	7.394366268	0.000238245	0.001667025	-0.328876949	Tube1
1371131_a_at	-1.190346127	10.74659087	-20.67948556	4.48E-07	1.59E-05	6.827594775	Txnip
1386958_at	-1.316386227	8.084061367	-12.82770707	8.76E-06	0.000134491	3.442491604	Txnrd1
1373274_at	1.285560626	5.616270845	9.740326647	4.68E-05	0.000466794	1.526704394	Txnrd3
1367953_at	1.100200294	8.570306991	26.80002325	8.75E-08	5.29E-06	8.664794568	Tyro3
1382819_at	2.526846814	3.968458522	13.20900176	7.32E-06	0.000118363	3.648621893	Tyrp1
1379633_a_at	-7.123734382	6.261120232	-50.82754796	1.52E-09	4.11E-07	13.04915371	Uba7
1373298_at	1.418638797	7.537743012	10.90108668	2.37E-05	0.00027988	2.304544224	Ubash3b
1368762_at	-1.691823123	3.35013391	-7.264136124	0.000263959	0.001805734	-0.445518278	Ubd
1388484_at	1.843318585	9.750577701	17.31415258	1.36E-06	3.44E-05	5.564879151	Ube2c
1382262_at	1.303483982	6.038628756	8.936735035	7.84E-05	0.000694905	0.938575033	Ube2e3
1375965_at	1.430683833	7.261901359	4.928487358	0.002230474	0.010242988	-2.85935245	Ube2k
1373037_at	-2.345372927	11.0229659	-21.97871695	3.05E-07	1.20E-05	7.260486992	Ube2l6
1379414_at	1.268916908	4.727258989	12.25952332	1.16E-05	0.000164886	3.124380992	Ube2ql1
1390481_a_at	1.656805491	8.496098506	16.33374934	1.96E-06	4.42E-05	5.150865152	Ube2t
1373249_at	1.103565628	7.486474928	7.693796347	0.000189264	0.001382319	-0.066794347	Ubl4a
1387759_s_at	-1.237595397	9.96773046	-17.53713511	1.26E-06	3.28E-05	5.6558161	Ugt1a1 /// Ugt1a2 /// Ugt1a3 /// Ugt1a5 /// Ugt1a6 /// Ugt1a7c /// Ugt1a8 /// Ugt1a9
1368858_at	1.808932249	8.027075371	7.955170147	0.000155747	0.001185989	0.155302966	Ugt8
1378640_at	1.512434247	9.473946535	12.91676879	8.40E-06	0.000130298	3.491151271	Uhrf1
1389738_at	1.187572531	8.602075387	10.91479494	2.35E-05	0.000278172	2.313275448	Ung
1372691_at	-5.21525534	6.733627443	-19.52192034	6.43E-07	2.05E-05	6.418081377	Upp1
1373538_at	1.14935466	8.860319694	13.76375747	5.67E-06	9.91E-05	3.938681173	Usp1
1389034_at	-5.792364934	11.2310771	-29.61371761	4.66E-08	3.34E-06	9.367082137	Usp18
1378679_at	-1.326010596	12.2621197	-9.635066965	5.00E-05	0.000490648	1.452139247	Usp25
1398840_at	-1.226961272	8.246507128	-7.863858171	0.000166619	0.001249802	0.078400142	Vamp5
1369970_at	-1.02090455	11.62863027	-17.22182294	1.41E-06	3.51E-05	5.526886293	Vamp8
1375493_at	1.040435661	8.356604697	8.345791156	0.000117538	0.000957388	0.476258805	Vangl2
1369387_at	-1.503047914	8.137253796	-10.73554931	2.60E-05	0.000300748	2.198313127	Vav1
1393349_x_at	1.149555041	8.258559187	10.3265587	3.29E-05	0.000356932	1.929357088	Vav2
1372905_at	1.629817002	11.44414123	61.78402877	4.39E-10	1.99E-07	14.29492119	Vcl
1373807_at	-2.110637856	8.567453484	-35.01036997	1.61E-08	1.66E-06	10.53362984	Vegfa
1368359_a_at	-2.811907482	11.17666643	-42.96220485	4.41E-09	7.13E-07	11.93247711	Vgf
1384709_at	1.051466641	4.443001493	9.762287085	4.62E-05	0.000462219	1.542171277	Vgll3
1392924_at	1.03953571	6.390925705	5.758837353	0.000972691	0.005142763	-1.92484976	Vldlr
1373338_at	1.111193993	8.10771466	8.181177755	0.000132156	0.001046051	0.342559844	Vmac
1375464_at	-1.384320258	3.554021202	-4.695686764	0.002861373	0.012672155	-3.138393444	Vsig10l
1391041_at	-3.078973663	4.586917245	-11.44278238	1.76E-05	0.000224578	2.642172144	Vwa3b
1384101_at	-1.168050096	8.445732886	-9.431050186	5.68E-05	0.000540929	1.305551702	Wasl
1380930_at	1.169374754	5.563034151	4.07409565	0.005781468	0.02294511	-3.921674201	Wdfy4
1395974_at	-1.093786984	9.702737172	-10.48177348	3.01E-05	0.000333441	2.03254003	Wdr81
1397409_s_at	1.609429604	6.914029014	11.7038511	1.54E-05	0.000203668	2.799681661	Wee1
1393260_at	-6.77007193	5.779253435	-68.17655577	2.35E-10	1.42E-07	14.89698953	Wfdc21
1377000_at	-1.15698236	4.236849164	-14.03263804	5.03E-06	9.02E-05	4.075286215	Whamm
1377273_at	1.403920738	8.186789762	9.987050816	4.03E-05	0.000416845	1.698726766	Whsc1
1389068_at	-1.064218412	7.717516471	-14.38979733	4.31E-06	8.05E-05	4.252920643	Wipi2
1398645_at	2.101399398	7.33851987	9.566020316	5.22E-05	0.000507483	1.402836445	Wnt7a
1376818_at	1.568225691	6.797867507	14.60558111	3.93E-06	7.54E-05	4.358202564	Wtip
1379027_at	1.195053788	10.25815676	8.251360893	0.000125683	0.001009458	0.399835057	Wwc1
1376642_at	-2.474616744	6.121207524	-22.44310699	2.68E-07	1.10E-05	7.408928468	Xkr8
1393405_at	1.765101122	3.715800524	10.03669842	3.91E-05	0.000407961	1.732885609	Xrcc2
1374991_at	1.777349703	5.603302349	7.499062319	0.000219635	0.001560527	-0.236285679	Ydjc
1385027_at	1.614233842	4.33979558	7.496831275	0.000220014	0.001562148	-0.238247954	Ypel1
1371070_at	-7.851452127	6.717694376	-42.74207005	4.56E-09	7.13E-07	11.89783968	Zbp1
1393140_at	-3.48440306	6.065854108	-14.98988322	3.34E-06	6.64E-05	4.542049921	Zc3h12a
1398625_at	1.049762836	11.19916333	9.550133242	5.27E-05	0.000511285	1.391448007	Zcchc18
1398386_at	-1.289246862	9.714659388	-17.97869894	1.08E-06	2.95E-05	5.832568782	Zcchc6
1373767_at	-1.262899445	9.308761892	-11.12087728	2.10E-05	0.000255237	2.443345555	Zfand2a
1375984_at	1.129513555	7.795902202	5.539331636	0.001201087	0.006122373	-2.162964534	Zfhx4
1390592_at	1.414199935	8.051275191	9.926085445	4.18E-05	0.000428942	1.656573788	Zfp106
1374127_at	-1.02553203	7.871399582	-6.014769972	0.000766125	0.004219184	-1.654910729	Zfp18
1379967_at	1.42239165	9.615582435	14.38381005	4.32E-06	8.07E-05	4.24997784	Zfp367
1396860_s_at	-1.179649058	6.584882083	-10.91675118	2.35E-05	0.000278172	2.314520624	Zfp423
1379070_at	1.648075946	7.59970571	12.03515049	1.30E-05	0.000179959	2.994951118	Zfp488
1385059_at	-1.893127501	4.378218729	-5.982341048	0.000789324	0.004322283	-1.688666677	Zfp655
1376465_at	1.249545736	9.68054985	13.00752811	8.04E-06	0.000126184	3.540414246	Zfp704
1393020_at	-1.022683015	9.330113351	-9.870977859	4.32E-05	0.000439911	1.618272707	Zmym6nb
1372826_at	-1.133028937	8.342918395	-18.12972126	1.02E-06	2.83E-05	5.892035148	Znrf1
1373136_at	-1.446153884	9.750563568	-22.22276284	2.85E-07	1.14E-05	7.33889066	Zufsp
1385220_at	1.10619218	9.278106358	18.9983839	7.62E-07	2.30E-05	6.224791907	Zwilch
